1 ***Rare but not absent: the Inverted Mitogenomes of Deep-Sea Hatchetfish***

2

3 André Gomes-dos-Santos<sup>1</sup>, Nair Vilas-Arrondo<sup>2,3</sup>, André M. Machado<sup>1</sup>, Esther  
4 Román-Marcote<sup>3</sup>, Jose Luís Del Río Iglesias<sup>3</sup>, Francisco Baldó<sup>4</sup>, Montse Pérez<sup>3</sup>,  
5 Miguel M. Fonseca<sup>1</sup>, L. Filipe C. Castro<sup>1,5\*</sup> and Elsa Froufe<sup>1\*</sup>

6

7 <sup>1</sup>CIIMAR/CIMAR - Interdisciplinary Centre of Marine and Environmental Research,  
8 University of Porto, Matosinhos, Portugal

9 <sup>2</sup> Programa de Doctorado “Ciencias marinas, Tecnología y Gestión” (Do\*MAR),  
10 Montse Pérez Facultad de biología, Universidad de Vigo, Vigo, Spain

11 <sup>3</sup> Centro Oceanográfico de Vigo Instituto Español de Oceanografía (IEO, CSIC).  
12 Subida a Radio Faro, 50. 36390 Vigo (Pontevedra), Spain

13 <sup>4</sup> Centro Oceanográfico de Cádiz, Instituto Español de Oceanografía (IEO, CSIC),  
14 Puerto pesquero, dársena de Levante s/n, 11006 Cádiz, Spain

15 <sup>5</sup> Department of Biology, Faculty of Sciences, University of Porto, Porto, Portugal

16 \* Corresponding authors: Elsa Froufe [elsafroufe@gmail.com](mailto:elsafroufe@gmail.com) and L. Filipe C. Castro  
17 [lfilipecastro@gmail.com](mailto:lfilipecastro@gmail.com)

18

19

20

21 **Abstract**

22 Mitochondrial genomes are by definition compact and structurally stable over aeons.  
23 This generalized perception results from a vertebrate-centric vision, as very few  
24 types of mtDNA rearrangements have been described in vertebrates. By combining a  
25 panel of sequencing approaches, including short- and long-reads, we show that  
26 species from a group of illusive marine teleosts, the deep-sea hatchetfish  
27 (Stomiiforms: Sternoptychidae), display a myriad of new mtDNA structural  
28 arrangements. We show a never reported inversion of the coding direction of protein-  
29 coding genes (PCG) coupled with a strand asymmetry nucleotide composition  
30 reversal directly related to the strand location of the Control Region (which includes  
31 the heavy strand replication origin). An analysis of the 4-fold redundant sites of the  
32 PCGs, in thousands of vertebrate mtDNAs, revealed the rarity of this phenomenon,  
33 only found in 9 fish species, five of which are deep-sea hatchetfish. Curiously, in  
34 Antarctic notothenioid fishes (Trematominae), where a single PCG inversion (the only  
35 other record in fish) is coupled with the inversion of the Control Region, the standard  
36 asymmetry is disrupted for the remaining PCG but not yet reversed, suggesting a  
37 transitory state in this species mtDNA. Together, our findings hint that a relaxation of  
38 the classic vertebrate mitochondrial structural *stasis*, observed in Sternoptychidae  
39 and Trematominae, promotes disruption of the natural balance of asymmetry of the  
40 mtDNA. Our findings support the long-lasting hypothesis that replication is the main  
41 molecular mechanism promoting the strand-specific compositional bias of this unique  
42 and indispensable molecule.

43

44

45 **Keywords:** mitogenome; strand asymmetry; deep-sea fish; vertebrate; mitochondrial

46 gene order; rearrangements.

47

48 **Introduction**

49 Counterintuitively, the mitochondrial genome (mtDNA) is far more variable than  
50 normally recognized, including structure, gene content, order and orientation,  
51 organization and mode of expression (Shtolz and Mishmar 2023). In Metazoa,  
52 several types of mtDNA are described, including linear telomeric molecules (e.g.,  
53 Cnidaria), “giant” circular molecules (e.g. some Bivalvia and Placozoa) and several  
54 mini-circular molecules (e.g. Insecta) (Kolesnikov and Gerasimov 2012; Shtolz and  
55 Mishmar 2023). In vertebrates, the classic mtDNA is described as a compact circular  
56 molecule, maternally inherited, between 16–19 kbp and two compositionally distinct  
57 strands, conventionally referred to as heavy (H-strand with high G composition) and  
58 light (L-strand with low G composition) (Clayton 1982; Boore 1999; Kolesnikov and  
59 Gerasimov 2012). The standard vertebrate mtDNA encodes 37 genes, 13 protein-  
60 coding genes (PCG); two ribosomal RNAs (rRNAs); 22 transfer RNAs (tRNAs); and  
61 two differently located and strand-specific replication origins (heavy strand replication  
62 origin [OH] and light strand replication origin [OL]) (Clayton 1982; Lee et al. 1995;  
63 Boore 1999; Kolesnikov and Gerasimov 2012). The OH is placed within a larger non-  
64 coding region, the Control Region (CR), which includes several regulators of the  
65 mtDNA replication and transcription and where four evolutionary conserved  
66 sequence blocks are commonly found (i.e, CSB-I, CSB-II, CSB-III, and CSB-D)  
67 (Clayton 1982; Lee et al. 1995; Boore 1999; Kolesnikov and Gerasimov 2012). The  
68 13 mtDNA PCG, which follows the standard architecture (i.e., number, relative  
69 positioning and coding strand), play key functional roles in the oxidative  
70 phosphorylation (OXPHOS) cascade (Clayton 1982; Boore 1999; Kolesnikov and  
71 Gerasimov 2012).

72 Exceptions to this generalized picture, in vertebrate classes, are extremely rare, with  
73 very few and small-scale deviations (Gissi et al. 2010; Zhang et al. 2020; Formenti et  
74 al. 2021; Montaña-Lozano et al. 2022; Sharbrough et al. 2023; Shtolz and Mishmar  
75 2023). Among the different groups, birds and reptiles show the highest distribution of  
76 rearranged genes, while mammals and fish show residual examples of  
77 rearrangements (Zhang et al. 2020; Montaña-Lozano et al. 2022; Shtolz and  
78 Mishmar 2023). In fish, three distinct types of mtDNA gene rearrangements have  
79 been described recently by Satoh et al. (2016): “shuffling”, i.e., local position change  
80 maintaining coding polarity (i.e., genes coding strand); “translocation”, i.e., movement  
81 to a distinct location maintaining the genes encoded strand; and the rarest event  
82 “inversions”, i.e., genes (or non-coding unities) switch to their complementary strand  
83 (Fonseca et al. 2008; Kong et al. 2009; Gong et al. 2013; Fonseca et al. 2014;  
84 Arrondo et al. 2020; Papetti et al. 2021; Shtolz and Mishmar 2023). Inversions, when  
85 acting upon the replication controlling unities (i.e., the CR or OH), have been shown  
86 to promote a switch of the strand asymmetry nucleotide composition. Consequently,  
87 The mtDNA replication is suggested to be involved in the differently accumulated  
88 strand mutation patterns of the mtDNA (assuming an asymmetric model of mtDNA  
89 replication) (Fonseca et al. 2008; Fonseca et al. 2014; Shtolz and Mishmar 2023).  
90 Marine deep-sea hatchetfish from the family Sternoptychidae (Order: Stomiiformes)  
91 are a group of small (less than 100 mm) and peculiar mesopelagic fishes (Nelson  
92 2016). The family consists of two subfamilies, Maurolicinae and Sternoptychinae,  
93 which include around 70 species distributed through 10 genera (Howell and Krueger  
94 1987; Nelson 2016; Coad 2019). These species are generally found in high  
95 abundance and biomass within the mesopelagic ichthyofauna and with important  
96 ecological functions and a key trophic position (Gjoesaeter and Kawaguchi 1980;

97 Eduardo et al. 2020). Species from the family Sternoptychidae have been described  
98 as “*some of the most bizarre stomiiforms*” and are characterized by having a  
99 condensed body with a reflecting fattened silver side that allows camouflage  
100 (Carnevale 2008). As in all other Stomiiformes, deep-sea hatchetfish possess  
101 specialized bioluminescent organs, i.e., photophores that allow them to produce light  
102 (Krönström et al. 2005; Carnevale 2008; Haddock et al. 2009).

103 Here we describe four new Sternoptychidae whole mtDNA, using Illumina PE short  
104 reads and Oxford Nanopore long reads, showing that the mtDNA of Sternoptychidae  
105 have a diverse and unusual gene architecture. Our findings include mtDNA gene  
106 shuffling, translocation and inversions, acting on PCG, tRNA rRNA and/or CR. In  
107 particular, we demonstrate that strand asymmetry nucleotide composition reversal  
108 occurs when genes change their coding polarity relative to the Control Region (i.e.  
109 OH, initiation of replication). Conversely, inversions of CR were shown to promote  
110 the complete nucleotide strand asymmetry reversal in two deep-sea hatchetfish  
111 species. Moreover, by investigating over 6000 species we determine that strand  
112 asymmetry is a rare event in vertebrate mitochondrial genomes. In Antarctic  
113 notothenioid fishes (Trematominae), a PCG inversion (the only case previously  
114 reported in fish) coupled with the CR inversion is shown to disrupt the standard  
115 asymmetry for the remaining PCG. Together, our findings provide strong evidence  
116 supporting the long-lasting theory that replication is the main molecular mechanism  
117 promoting the strand-specific compositional bias of the mtDNA.

118

## 119 **Results and Discussion**

120

121 **Deep-sea hatchetfish mtDNA show a widespread complex repetitive region**  
122 **hampering full sequence circularization**

123

124 We generated four novel whole mitochondrial genomes from the marine hatchetfish,  
125 two of them resulting from new nuclear genome assemblies: *Argyropelecus*  
126 *aculeatus* Valenciennes, 1850 (lovely hatchetfish), *Argyropelecus hemigymnus*  
127 Cocco, 1829 (half-naked hatchetfish), *Argyropelecus olfersii* (Cuvier, 1829) and  
128 *Maurollicus muelleri* (Gmelin, 1789) (Mueller's pearlside). The raw sequencing reads  
129 and mtDNA assemblies were deposited at NCBI, and respective SRA and assembly  
130 accessions are depicted in Table 1 and linked to BioProject PRJNA977192  
131 (Provisory Reviewer Link  
132 <https://dataview.ncbi.nlm.nih.gov/object/PRJNA977192?reviewer=qp1erbs33ac430jh>  
133 [nvu9demc1m](#)).

134 The mtDNA lengths varied from 15,230 bp in *M. muelleri* to 23,291 bp in *A.*  
135 *aculeatus*, largely influenced by poorly resolved repetitive regions, which includes the  
136 putative CR and long species-specific intergenic regions (figs 1-3). The only  
137 previously assembled hatchet fish mtDNA with a CR annotation is *Polyipnus polli*  
138 Schultz, 1961 (AP012962.1) (fig. 1). Conversely, in other publicly available mtDNAs,  
139 the CR was either not annotated, i.e., in *Sternoptyx obscura* Garman, 1899  
140 (OP057081.1) and in *Sternoptyx diaphana* Hermann, 1781 (MT588184.1) (fig. 2), or  
141 not sequenced, i.e., in *M. muelleri* (AP012963.1) and *Argyropelecus affinis* Garman,  
142 1899 (AP012964.1) (fig 1). The difficulty in obtaining this region has already been  
143 observed in many other animal groups (e.g., (Ghiselli et al. 2021)). Conversely, in the  
144 three novel *Argyropelecus sp.* sequenced mtDNAs, i.e., *A. aculeatus*, *A.*  
145 *hemigymnus*, and *A. olfersii*, long intergenic repeats were identified (fig. 3). The

146 difficulty in resolving these repetitive regions using short reads prevented the  
147 assembly of a single contig in *A. offersii* (composed of two contigs), as well as the  
148 circularization of the *A. hemigymnus* assembly (fig. 3). This factor also hampered the  
149 assembly of the recently published *S. diaphana* mtDNA, which required scaffolding  
150 with Sanger sequencing (Arrondo et al. 2020). Nevertheless, we efficiently identified  
151 the CSB-II (thus the CR) in all but one (i.e., *A. offersii*) (Supplementary File 1 and fig.  
152 S1).

153 Sequencing approaches are key for resolving complex mtDNA assemblies (e.g.  
154 (Calcino et al. 2020; Formenti et al. 2021)). Consequently, in *A. aculeatus* we used  
155 Oxford Nanopore long-reads to determine the composition of the complete mtDNA  
156 molecule. The produced reads were highly efficient in resolving the full mtDNA  
157 sequence, with some reads even spanning the entire molecule, supporting the  
158 inferred architecture. The final assembly was circularized, revealing two long  
159 repetitive regions, one spanning ~4800 bp, which included the CSB-II (between  
160 tRNA-Asp and tRNA-Pro) and the other ~1750 bp (between tRNA-Phe and a COI)  
161 (figs 3 and S2). As for the other two *Argyroleucus sp.*, although the short-read  
162 assemblies retrieved all the mtDNA genes, the aforementioned repetitive regions  
163 were fragmented (fig. 3).

164

### 165 **Gene shuffling, translocations, duplications and inversions define the structure** 166 **of mtDNA structure in deep-sea hatchetfish**

167

168 We next investigated the gene content and overall structure of the mtDNA in deep-  
169 sea hatchetfish. The newly sequenced genomes as well as those deposited in  
170 GenBank show striking deviations from the standard vertebrate gene arrangement



171 (figs 1-3). While the mtDNA from three species, i.e., *M. muelleri*, *A. affinis* and *P.*  
172 *polli*, maintain the standard vertebrate mtDNA architecture (fig. 2), most of the newly  
173 sequenced mtDNA revealed considerably modified architectures (figs 2-3) (Saccone  
174 et al. 2002; Satoh et al. 2016). The results show that shuffling, translocation and  
175 inversion of PCGs, rRNAs and more abundantly tRNAs, are widespread in the  
176 mtDNA deep-sea hatchetfish (figs 2-3). Even within the same genus, high structural  
177 differences can be detected (figs 2-3). Species from the *Argyropelecus* genus show  
178 four distinct mtDNA architectures: one maintains the standard vertebrate structure;  
179 while the other three share a radical inversion of a large fragment composed of  
180 several genes, with reciprocal additional unique features (fig. 3). This fragment  
181 includes the inversion of the PCGs ND2 and ND1, the rRNA 16S and 12S and  
182 several tRNAs (M, I, L1, V and F), as well as the shuffling of two tRNAs (A and C)  
183 (fig. 3). The inversion of two PCGs has never been reported in fish mtDNA before. To  
184 date, the only reported inversion of a PCG is of ND1 in a single clade of Antarctic  
185 notothenioid fishes (Nototheniidae: Trematominae) (Papetti et al. 2021; Minhas et al.  
186 2023). Interestingly, this also resulted from the inversion of a large fragment, which  
187 included the rRNA genes, several tRNAs (E, I, L2, V and F) as well as the CR  
188 (Papetti et al. 2021; Minhas et al. 2023).

189 Some species-specific tRNA duplications were observed (figs. 2-3). The most striking  
190 of these duplications was captured by the Nanopore-based assembly in *A. aculeatus*,  
191 corresponding to a tandem duplication of two tRNAs C-A, followed by one tRNA C.  
192 This pattern seems to also occur in *A. offersii*, in which a shorter tandem duplication  
193 of two tRNAs C-A was present, while in *A. hemigymnus* the two tRNAs are present in  
194 the same location but in a single copy (fig. 3). Furthermore, *A. hemigymnus* shows a  
195 unique shuffling of the ND6 and the tRNA E (fig. 2). The two *Sternoptyx sp.* revealed

196 the overall same mtDNA architecture, with *S. obscura* having duplications and  
197 “*pseudogenization*” of ND3 and 16S (fig. 2). Gene duplication in mtDNA is often  
198 followed by the loss of one the copies, frequently retaining fragments of the original  
199 duplicated gene (Sato et al. 2016; Papetti et al. 2021).

200

## 201 **Phylogenetic Analysis shows poorly resolved deep-sea hatchetfish**

### 202 **evolutionary relationships**

203

204 We next analysed the phylogenetic relationships between the various deep-sea  
205 hatchetfish species. The resulting phylogenetic inference, rooted with *Coregonus*  
206 *lavaretus* (Linnaeus, 1758) (following (Ijichi et al. 2018; Arrondo et al. 2020)), is split  
207 into two major groups, one composed of order Stomiiformes and the other composed  
208 of families Synodontidae, Ateleopodidae, Myctophidae and Trachipteridae (fig. 4).  
209 Stomiiformes' phylogenetic relationships are poorly resolved, with very low support in  
210 most of the nodes. Within deep-sea hatchet fish, i.e., family Sternoptychidae, the  
211 relationships among the genus are also poorly resolved and an unexpected long  
212 branch is seen for the two *Sternoptyx* species (fig. 4). The low support persisted in  
213 the amino acid-based phylogeny (fig. S3). The mtDNA phylogeny here presented is  
214 the first to include more than one species of the deep-sea hatchet fish (see (Arrondo  
215 et al. 2020)). However, the taxon representation is still incomplete, which likely  
216 explains the low support observed. The relationships of the four *Argyropelecus* sp.  
217 are well resolved and reflect the structural mtDNA variation here described (figs. 1-3).  
218 *Argyropelecus affinis*, the only species to preserve the standard vertebrate structure  
219 is the first split within the genus, followed by *A. hemigymnus*, sister to *A. offersii* + *A.*  
220 *aculeatus*, the two most structurally similar (fig. 4).

221 To obtain a more taxa-representative phylogeny, all the cytochrome oxidase subunit I  
222 (COI) sequences available on GenBank were used (fig. 3). The COI alignment  
223 included a total of 261 sequences (total length of 652 bp) (Supplementary File 2),  
224 from 26 distinct deep-sea hatchetfish species and the outgroup species, i.e.,  
225 *Coregonus clupeaformis* (Mitchill, 1818). The resulting nucleotide phylogeny shows  
226 once again low support among inter-genus relationships (fig. 4). Even though this  
227 phylogeny includes 260 sequences from marine hatchetfish, it highlights the need to  
228 increase the molecular data for the whole group.

229

230 **GC/AT skew of strand-specific 4-fold redundant sites show a strikingly**  
231 **frequent strand asymmetry reversal in deep-sea hatchetfish always coupled**  
232 **with CR strand relative position**

233

234 The mtDNA asymmetric strand nucleotide composition of the H and L strands is  
235 generally highly demarked in vertebrates, with a strong signature in the A-T and C-G  
236 composition of each stand (Saccone et al. 2002). This pronounced signature is the  
237 distinguishable factor between the two strands, i.e., the H(heavy)-strand, which is  
238 guanine rich, and L(light)-strand, which is guanine poor (Francino and Ochman  
239 1997). Conversely, inverted genes, i.e., genes that change to the complementary  
240 strand, will be exposed to the mutational bias specific of the new strand, and thus are  
241 expected to change their mutational signature accordingly, as proposed by the  
242 asymmetric model of mtDNA replication (Fonseca et al. 2008; Kennedy et al. 2013;  
243 Fonseca et al. 2014).

244 Given the newly detected inversions of two PCGs in *A. aculeatus*, *A. hemigymnus*,  
245 and *A. olfersii*, as well as the oddly long branch lengths observed in *Sternoptyx sp.*,

246 we next estimated the GC/AT skew of the PCGs at the 4-fold redundant sites (the  
247 most likely to accumulate strand-specific mutations and to reflect the underlying  
248 mutational processes given that selection acting on these sites is weaker) for all the  
249 marine hatchetfish under study.

250 As expected, in the mtDNA that maintains the standard vertebrate architecture with  
251 no detectable structural changes, i.e., *M. muelleri*, *A. affinis* and *P. polli*, shows the  
252 AT/GC skew pattern of a gene encoded in the L-strand (fig. 5 and S4, i.e., AT skew <  
253 0 and GC skew > 0). Interestingly, in the two *Argyropelecus sp.* with inverted PCG  
254 polarity, this AT/GC skew pattern was observed in ND6, but also in ND1 and ND2,  
255 the two PCGs included in the inverted fragment (fig. 5 and S4). Most strikingly, for  
256 the two *Sternoptyx sp.*, the entire AT/GC skew pattern is reversed in all PCGs (fig. 5  
257 and S4) but with no rearrangements or inversions detected in those genes. What  
258 could be causing the AT/GC skew reversion in these genomes? To date, such  
259 phenomenon, in vertebrates, has been suggested to result from CR inversion, and  
260 from the replication mechanism itself with the leading strand becoming the lagging  
261 strand and vice-versa during an asymmetric mode of replication (Fonseca et al.  
262 2008; Fonseca et al. 2014). We tested this hypothesis by characterising the relative  
263 positioning of the initiation of replication and by identifying elements that have been  
264 described to be key in the replication mechanism of vertebrate mtDNA: the  
265 conserved sequence blocks CSB-II and III. Typically, CSB-II consists of six or more  
266 cytosines, one thymine and one adenine ending with five or more cytosines: 5'-  
267 CCCCCCTACCCCC – 3'. We used this sequence as a reference, allowing for some  
268 variation in the length of the poly-C flanks. CSB-III is less conserved, generally  
269 identified by its positioning regarding CSB-II, and may be absent in fish CR (Sato et  
270 al. 2016). The Motif Discovery analysis identified CSB-II in all the analysed

271 sequences, except in *P. polli* while CSB-III was less prevalent, as previously  
272 observed by Satoh et al., (2016) (Supplementary File 1 and fig. S1). The absence of  
273 both CSBs in *P. polli* needs further evaluation, as this mitogenome is a direct  
274 submission to NCBI without detailed information on how it was generated.  
275 Astonishingly, as previously predicted, the orientation of the CSB-II and therefore of  
276 the CR relative to the PCG was the common denominator determining the AT/GC  
277 skew nucleotide asymmetry pattern (Supplementary File 1 and figs 1-3 and S1). That  
278 is, in the two *Sternoptyx sp.* the CSB-II is the only element changing its coding  
279 polarity (inversion), having the same polarity as ND6 and contrary to all other PCGs,  
280 while in the remaining species, the relative position follows the standard vertebrate  
281 architecture (Supplementary File 1 and figs 1-3 and S1).  
282 To date, the only reported PCG inversion in a vertebrate is in one clade of Antarctic  
283 notothenioid fishes (Nototheniidae: Trematominae), consisting of the inversion of a  
284 large genomic segment (~5kbp), which includes four tRNAs, two rRNAs, the PCG  
285 inversion (ND1) and the CR (Kennedy et al. 2013; Papetti et al. 2021). Once again,  
286 the relative position of the CR, here identified through CSB-II (Supplementary File 1  
287 and fig. S1), is the determining factor shaping the nucleotide strand asymmetry, i.e.,  
288 ND1 is the only PCG with the same polarity as the CR and thus it is also the only  
289 PCG maintaining its AT/GC skew pattern, while the remaining genes show a  
290 completely disrupted pattern. Interestingly, the fact that the latter-mentioned PCG  
291 shows a disruption but not a reversal AT/GC skew pattern, suggests that, in this  
292 group of organisms, the process of the mtDNA nucleotide composition strand  
293 asymmetry reversal is still in a transitory state (fig. S5). A complete disruption of the  
294 typical strand asymmetry signature was detected in all 15 Trematominae mtDNA

295 available, while the remaining notothenioid fishes maintained the standard pattern  
296 (fig. S5).

297 To access similar putative hidden patterns in other vertebrates, we next performed a  
298 vertebrate-wide assessment of the AT/GC skew at 4-fold redundant sites (Fonseca et  
299 al. 2008; Fonseca et al. 2014) in a total of 6,297 mtDNA (Retrieved from RefSeq in  
300 May 2022). The results demonstrate that the complete reversal of the nucleotide  
301 strand asymmetry composition is observed solely in the *Sternoptyx sp.* and those  
302 previously reported by Fonseca et al., (2008, 2014), totalizing seven species (figs. 6  
303 and S4). Moreover, single gene asymmetry reversal is detectable for the ND1 and  
304 ND2 genes of the three *Argyropelecus* species here described (figs. 6 and S4).

305 Given that there are still many un-sequenced marine hatchetfish whole mtDNA, we  
306 hypothesised that calculating the AT/GC skew pattern at 4-fold redundant sites for  
307 the most sequenced mitochondrial gene of the group, i.e., COI, would be an  
308 informative strategy regarding the whole family. The results also show the reversed  
309 pattern in all analysed *Sternoptyx* species (n=4), thus suggesting the reversal of the  
310 nucleotide strand asymmetry is shared by all analysed *Sternoptyx* (figs. 6 and S4).  
311 The remaining hatchetfish species maintain the standard vertebrate AT/GC skew  
312 pattern, which is also in accordance with the results deduced from whole mtDNA  
313 assembly and annotation.

314

### 315 **Genomic *Oddities*: inverted mtDNA and large nuclear genomes**

316

317 The combination of sequencing methodologies allowed the determination of *de novo*  
318 four mtDNA from deep-sea hatchetfish species. Strikingly, the sequential analysis of  
319 gene annotation, phylogenetics, and AT/GC skew sequence investigations support a

320 unique case of mtDNA structural plasticity (Shtolz and Mishmar 2023). We expanded  
321 the analysis to include thousands of available mtDNA. Our findings show that partial  
322 or full mtDNA inversions are evolutionary restricted in a minute of unrelated fish  
323 clades: *Argyropelecus sp.* *Sternoptyx sp.* The immediate causes of this  
324 phylogenetically restricted alteration of mtDNA structure are unknown and deserve  
325 further exploration. In fact, within Metazoa, vertebrates show the strongest signs of  
326 purifying selection for gene rearrangement (Shtolz and Mishmar 2023), with recent  
327 studies suggesting that gene blocks inversions (only recorded in invertebrates)  
328 promote sticking changes in the transcriptional pattern, thus requiring new regulatory  
329 elements (Blumberg et al. 2014; Blumberg et al. 2017; Barshad et al. 2018; Shtolz  
330 and Mishmar 2023). Consequently, our highly unexpected findings raise the  
331 interesting possibility of an adaptive scenario of the reported mtDNA oddities.  
332 Interestingly, using the high-coverage whole genome sequencing for *A. aculeatus*  
333 and *S. diaphana* we were able to appraise the genome size for both species (fig. S6).  
334 The results show an unexpectedly large genome size estimation, with both species  
335 being approximately 2.70 Gbp long (fig. S6). Most teleost species have an average of  
336 1 Gbp long genome size, with the exceptions being usually attributed to whole  
337 genome duplication events (Parey et al. 2022). Together, our results suggest that like  
338 the mitogenomes, the whole genome of deep-sea hatchetfish is also unusual and  
339 deserves future explorations.

340

341

## 342 **Methods**

343

### 344 **Samples collection and DNA extraction**

345 In total, four specimens were captured for this study, three from the genus  
346 *Argyropelecus*, i.e., *Argyropelecus aculeatus* Valenciennes, 1850, *Argyropelecus*  
347 *hemigymnus* Cocco, 1829, and *Argyropelecus offersii* (Cuvier, 1829), and one from  
348 genus *Maurolicus*, i.e., *Maurolicus muelleri* (Gmelin, 1789). The specimens were  
349 obtained during the scientific surveys: EU Groundfish Survey (Platuxa-2019) in North  
350 Atlantic (43,1544 N- 51,4429 W, 2019); from the EU Groundfish Survey (Platuxa-  
351 2019) in the Northwest Atlantic Ocean (43,3838 N- 49,0036 W, 2019); from the  
352 Survey PORCUPINE20 In Porcupine Bank (51.0677 N; -14.2862 W, 2020) and from  
353 EU Groundfish Survey FN3L19 in North Atlantic (-47,668 N; 47,497833 W),  
354 respectively. Morphological identification was performed onboard and whole  
355 specimens are stored in absolute ethanol and are stored at DNA and Tissue bank at  
356 CIIMAR – Interdisciplinary Center of Marine and Environmental Research. The  
357 specimen treatment has been approved by the CIIMAR ethical committee and by  
358 CIIMAR Managing Animal Welfare Body (ORBEA) according to the European Union  
359 Directive 2010/63/EU. Whole genomic DNA for each specimen was obtained from a  
360 small portion of the muscle tissue using the Qiagen MagAttract HMW DNA extraction  
361 kit, following the manufacturer's instructions. For all samples, total DNA was used for  
362 Illumina paired-end (PE) library preparation and sequencing at the Macrogen, Inc.  
363 (Seoul, Korea), using Illumina HiSeq X Ten platform, with 150 bp PE configuration.  
364 For *A. aculeatus* and *S. diaphana* high coverage whole genome (WGS) PE  
365 sequencing was performed, while the remaining samples were only sequenced at  
366 low coverage. Furthermore, low-coverage Nanopore (Oxford Nanopore) genome  
367 skimming was performed for *A. aculeatus*. Briefly, ~1 µg of genomic DNA was used  
368 for library preparation using the LSK109 kit and after sequenced on an FLO-MIN106  
369 revD SpotON R9.4 Flow Cell for 48 h.



370

### 371 **Whole mitogenome assemblies and annotation**

372 Raw Illumina PE reads were quality-filter and adaptors were removed using  
373 Trimmomatic (version 0.38) (Bolger et al. 2014), using the parameters LEADING:5  
374 TRAILING:5 SLIDINGWINDOW:5:20 MINLEN:36. Read quality was inspected before  
375 and after trimming using FastQC (version 0.11.8)  
376 (<http://www.bioinformatics.babraham.ac.uk/projects/fastqc/>).

377 Whole mitogenome reconstruction for each species was obtained using several  
378 distinct approaches. For each species, assemblies were performed with  
379 GetOrganelle v1.7.1 (Jin et al. 2020), specifying a multi k-mer approach (i.e., from  
380 20-125 with a 5-mer increment). GetOrganelle is an interactive baiting pipeline that  
381 filters mtDNA reads and uses the SPAdes assembler (Bankevich et al. 2012) to  
382 reconstruct the mitogenome with the filtered reads. The results of the assemblies  
383 were individually validated using multiple approaches. For cases where multiple  
384 assemblies were generated, i.e., *A. hemigymnus*, and *A. olfersii*, the gfa files were  
385 inspected using Bandage v0.8.1 (Wick et al. 2015) which revealed several  
386 ambiguous disjoints. Furthermore, annotation was generated for some of the putative  
387 assemblies using the module “annotate” from MitoZ v.3.4 (Meng et al. 2019), which  
388 showed that the ambiguous disjoints were localized within no-coding repetitive  
389 regions. Consequently, new assemblies were performed, first using larger k-mer with  
390 GetOrganelle v1.7.1 and if the problem persisted, using metaSPAdes v3.12.0 (Nurk  
391 et al. 2017) with the maximum K-mer size possible, i.e., 127. In the end, the selected  
392 best representative assemblies for each species were as follows, for *M. muelleri* the  
393 GetOrganelle assembly with multi k-mer (20-125-mer with a 5-mer increment), for *A.*  
394 *olfersii* the GetOrganelle assembly single k-mer (131-mer) and for *A. hemigymnus*

395 the metaSPAdes assembly with the maximum allowed k-mer size (127-mer). Every  
396 generated assembly was annotated with MitoZ (as described above). Read coverage  
397 distributions were analysed by aligning PE reads to the final genome assemblies  
398 using the Burrows-Wheeler Aligner (BWA) v.0.7.17-r1198 (Li 2013) and visualized in  
399 Artemis v17.0.1 (Carver et al. 2012) (fig. S7).

400 The Nanopore reads of *A. aculeatus* were quality-filtered using Filtlong  
401 (<https://github.com/rwick/Filtlong>). Given that long repetitive regions seem to cause  
402 problems with the PE-based assemblies, the Nanopore reads were filtered by size  
403 (i.e., >21,000bp) to include only reads spanning the whole mitogenome. The  
404 mitogenome assembly was performed using Unicycler v.0.4.8. (Wick et al. 2017)).  
405 The assembly was polished, following the author's suggestions, with the Nanopore  
406 reads using medaka v1.2.2 (<https://github.com/nanoporetech/medaka>) and with  
407 short-reads, first using Polypolish v0.4.3 (Wick and Holt 2022) and after using Polca  
408 (Zimin and Salzberg 2020). Genome annotation was performed with MitoZ (as  
409 described above). Read coverage distributions were analysed by aligning PE reads  
410 (as described above).

411 Finally, since the *Sternopyx obscura* mitogenome available on NCBI (OP057081) is  
412 marked as "UNVERIFIED" and therefore no annotation is provided, the mitogenome  
413 was downloaded and annotated using MitoZ (as described above).

414 To identify the putative Control Region (CR) of the deep sea hatchet fish mitogenome  
415 assemblies, we search for conserved motifs within non-coding regions to identify any  
416 of the known Conserved Sequence Blocks (CSB) that are involved in the replication  
417 initiation (Sato et al. 2016). The recently described CSBs of several fish species  
418 were here used as a reference to guide the search, including one Stomiformes, i.e.  
419 *Diplophos taenia* (Sato et al. 2016). We focused on the two most conserved of the

420 three CSBs, i.e., CSB-II and CSB-III. Given the lack of significant non-coding regions  
421 within the mitogenomes of *M.muelleri*, *A. affinis*, and *A. olfersii* (see Results and  
422 Discussion), these mitogenomes were not included in the analysis. Moreover, given  
423 the highly disproportionate read coverage distribution in the mitogenome non-coding  
424 regions of *A. hemigymnus* (fig. S7), this mitogenome was not considered. The  
425 coverage distribution indicates regions likely represented by the collapse of a highly  
426 repetitive region, thus not suited for the analysis. The non-coding regions from the  
427 remaining deep-sea hatchet fish species, the Antarctic Trematominae species,  
428 *Pagothenia borchgrevinkias* (with the only other record CDS mitochondrial inversion),  
429 as well as all the fish CSB-II and CSB-III identified by Satoh et al. (2016) were used.  
430 The sequences were uploaded to MEME v.5.5.2 (Bailey and Elkan 1994) and the  
431 Motif Discovery model was used to identify conserved motifs across all sequences,  
432 specifying a maximum motif width of 25.

433

#### 434 **Phylogenetic reconstruction**

435 To produce a phylogenetic reconstruction, the whole mitogenomes of all  
436 Stomiiformes available on NCBI (n=15), including four Sternoptychidae species (i.e.,  
437 *S. obscura*, *M. muelleri*, *P. polli*, *A. affinis*), the mitogenomes here produced and four  
438 outgroup taxa were used (Table 1). Alignments of the 13 protein-coding genes  
439 (PCGs) were produced using MAFFT v7.453 (Kato and Standley 2013). Positions  
440 with gaps in 50% or more of the individual alignments were removed using trimAL v.  
441 1.2rev59 (Capella-Gutiérrez et al. 2009) and all alignments were concatenated using  
442 FASconCAT-G (<https://github.com/PatrickKueck/FASconCAT-G>). The alignment  
443 composed by the concatenated PCGs from 15 species had a total length of 11,436  
444 bp. The partition scheme and the evolutionary models that best fit those schemes, as

445 well as Maximum Likelihood (ML) phylogenetic inference were produced in IQ-TREE  
446 v.1.6.12 (Nguyen et al. 2015; Kalyaanamoorthy et al. 2017).

447 For the amino acid phylogenetic reconstruction, individual alignments were translated  
448 to proteins using the EMBOSS seqret V.6.6.0.0, trimmed with trimAL v. 1.2rev59 (as  
449 described above) and concatenated using FASconCAT-G. The alignment composed  
450 by the concatenated PCGs from 15 species had a total length of 3,801 aa. The  
451 partition scheme and the evolutionary models that best fit those schemes, as well as  
452 Maximum Likelihood (ML) phylogenetic inference were produced in IQ-TREE  
453 v.1.6.12.

454

#### 455 **COI Phylogeny**

456 To produce a phylogenetic reconstruction with a wider taxa representation, all COI  
457 sequences available on GenBank (n=261) were downloaded (including the outgroup  
458 taxa *C. clupeiformis*). Alignment was performed using MAFFT v7.453 (Kato and  
459 Standley 2013) and an ML phylogenetic inference was constructed in IQ-TREE  
460 v.1.6.12, also estimating the best evolutionary model for the analysis.

461

#### 462 **Strand-specific 4-fold redundant sites GC/AT skew estimations**

463 The protein-coding genes of the complete mitogenomes of all vertebrates available in  
464 GenBank (<http://www.ncbi.nlm.nih.gov>) in May of 2022 were retrieved. The  
465 calculation of the GC skew  $(G-C)/(G+C)$  and the AT skew  $(A-T)/(A+T)$  at 4-fold  
466 redundant sites using custom Perl scripts (Fonseca et al. 2014). The  
467 redundant codons examined were alanine (GCN), proline (CCN), serine (TCN),  
468 threonine (ACN), arginine (CGN), glycine (GGN), leucine (CTN), and valine (GTN).

469 Furthermore, to infer GC/AT skew inversions in other species from family  
470 Sternoptychidae, for which no whole mitogenome is available, the COI sequences for  
471 all Sternoptychidae species available on GenBank were downloaded and the  
472 calculations applied, as described above.

473

#### 474 **Whole Genome size estimation**

475 The high coverage WGS PE sequencing reads for *A. aculeatus* and *S. diaphana*  
476 were used to estimate the overall characteristics of each species' genomes using  
477 Jellyfish v.2.2.10 and GenomeScope2 (Ranallo-Benavidez et al. 2020) with a k-mers  
478 length of 21.

479

#### 480 **Data Availability Statement**

481 The raw sequencing reads and mtDNA assemblies are deposited at NCBI, and  
482 respective SRA and assembly accessions are depicted in Table 1, all linked to  
483 BioProject PRJNA977192.

484

485

#### 486 **Funding**

487 AGS was funded by grant 2023\_033\_BI\_ATLANTIDA, under the Project  
488 “ATLANTIDA - Platform for the monitoring of the North Atlantic Ocean and tools for  
489 the sustainable exploitation of the marine resources” (NORTE-01-0145-FEDER-  
490 000040), co-financed by Portugal 2020 and the European Union through Program  
491 FEDER. EF is funded by the Portuguese Foundation for Science and Technology  
492 (FCT) under grant CEECINST/00027/2021. This research was developed under the

493 project ATLANTIDA - Platform for the monitoring of the North Atlantic Ocean and  
494 tools for the sustainable exploitation of the marine resources” (NORTE-01-0145-  
495 FEDER-000040). Additional strategic funding was provided by FCT  
496 UIDB/04423/2020 and UIDP/04423/2020. EU-Spain NAFO Groundfish survey has  
497 been co-funded by the European Union through the European Maritime and  
498 Fisheries Fund (EMFF) within the National Program of collection, management and  
499 use of data in the fisheries sector and support for scientific advice regarding the  
500 Common Fisheries Policy and IEO BIOPEOPLE project. The Spanish Bottom Trawl  
501 Survey on the Porcupine Bank (SP-PORC-Q3) was funded in part by the EU through  
502 the European Maritime and Fisheries Fund (EMFF) within the Spanish National  
503 Program of Collection, Management and Use of Data in the Fisheries Sector and  
504 Support for Scientific Advice Regarding the Common Fisheries Policy.

505

506

## 507 **FIGURE AND TABLE LEGENDS**

508

509 FIG.1. Left: Schematic representation of circular mitochondrial molecule highlighting  
510 the protein-coding genes encoded in the different strands. Right: Representation of  
511 linearized mitochondrial molecule, depicting the standard vertebrate gene order  
512 shared by the deep-sea hatchetfish species, *Polyipnus polli*, *Maurolicus muelleri* and  
513 *Argyropelecus affinis*. Genes encoded in the L-strand are depicted in red; Genes  
514 encoded in the H-strand are depicted in white. \* Control Region has not been  
515 sequenced in either *Maurolicus muelleri* or *Argyropelecus affinis*. The CSB-II  
516 sequence is a representation of the generally expected composition of the motif.

517

518 FIG.2. Left: Schematic representation of circular mitochondrial molecule highlighting  
519 the protein-coding genes encoded in the different strands. Right: Representation of  
520 linearized mitochondrial molecule, depicting the standard vertebrate gene order  
521 (middle) comparatively to deep-sea hatchetfish species, *Sternoptyx obscura*,  
522 *Sternoptyx diaphana*. Genes encoded in the L-strand are depicted in red; Genes  
523 encoded in the H-strand are depicted in white; Red shadow represents  
524 macrosyntenic patterns of gene inversion. The CSB-II sequence for the typical  
525 vertebrate mtDNA is a representation of the generally expected composition of the  
526 motif. The CSB-II sequences for the marine hatchet fish are the ones here identified.  
527

528 FIG.3. Left: Schematic representation of circular mitochondrial molecule highlighting  
529 the protein-coding genes encoded in the different strands. Right: Representation of  
530 linearized mitochondrial molecule, depicting the standard vertebrate gene order  
531 (second from the top) comparatively to deep-sea hatchetfish species, *Argyropelecus*  
532 *hemingymnus*, *Argyropelecus aculeatus* and *Argyropelecus olfersii*. Genes encoded  
533 in the L-strand are depicted in red; Genes encoded in the H-strand are depicted in  
534 white; Red shadow represents macrosyntenic patterns of gene inversion; Grey  
535 shadow represents macrosyntenic patterns of genes in the same strand. The CSB-II  
536 sequence for the typical vertebrate mtDNA is a representation of the generally  
537 expected composition of the motif. The CSB-II sequences for the marine hatchet fish  
538 are the ones here identified.

539

540 FIG.4. a) IQ-tree Maximum Likelihood (ML) phylogenetic inference retrieved from the  
541 nucleotide alignment of the 13 mitogenomes concatenated protein-coding genes. b)  
542 IQ-tree Maximum Likelihood (ML) phylogenetic inference retrieved from the

543 nucleotide alignment of all available COI sequences of deep-sea hatchetfish in NCBI.

544 Above the nodes are represented ultrafast bootstrap values above 80%.

545

546 FIG.5. Top: Strand-specific 4-fold redundant sites GC/AT skew estimations for all

547 protein-coding genes, for four model vertebrate species with standard vertebrate

548 mitogenome gene order, each species of deep-sea hatchetfish analysed and one

549 representative species from the Antarctic fish subfamily Trematominae that have an

550 inversion of the ND1 and CR (inside the box). Bottom: Strand-specific 4-fold

551 redundant sites GC/AT skew estimations for COI mitochondrial gene of all deep-sea

552 hatchetfish, available in NCBI. Red shadows highlight the inversion of the strand-

553 specific nucleotide GC/AT skew pattern. Middle: Schematic representation of circular

554 mitochondrial molecule highlighting the protein-coding genes encoded in the different

555 strands.

556

557 FIG.6. Plots of the GC and AT skews at the 4-fold redundant sites of the

558 mitochondrial protein-coding genes ND1, ND2, COX1 and ND6 from 6,297 vertebrate

559 species. Dots represent each of the 6,297 analysed vertebrate species, with red

560 (deep-sea hatchetfish) and green (other fish species) dots highlighting genes with

561 inverted AT and GC skews. The plots for the remaining protein-coding genes are

562 provided in fig.S4.

563

564 Table 1. List of whole mitogenomes used in the whole mitogenome-based phylogeny.

565 \* represent mitogenomes sequenced in this study.

566



567 FIG.S1. Schematic representation of the MEME - Motif discovery results, including  
568 the inferred conserved motif representing CSB-II (in red) and, in some species, CSB-  
569 III (in blue). The results include several CR from fish species studied in Satoh et al  
570 (2016) (using the same abbreviated nomenclature), as well as the non-coding  
571 regions of the deep-sea marine hatchet fish species *Sternoptyx obscura*, *Sternoptyx*  
572 *diaphana*, *Argyropelecus aculeatus*, the Stomiiformes species *Diplophos taenia*, and  
573 the Antarctic Trematominae species *Pagothenia borchgrevinki*.

574

575 FIG.S2. Complete circular mitochondrial molecule of the deep-sea hatchetfish  
576 species *Argyropelecus aculeatus*, produced by CGView/Proksee (<https://proksee.ca>).

577

578 FIG.S3. IQ-tree Maximum Likelihood (ML) phylogenetic inference retrieved from the  
579 amino acid alignments of the 13 concatenated mitogenome protein-coding genes.

580 Above the nodes are represented ultrafast bootstrap values.

581

582 FIG.S4. Plots of the GC and AT skews at the 4-fold redundant sites of the  
583 mitochondrial protein-coding genes ND3, ND4, ND4L, ND5, COX2, COX3, CYTB,  
584 ATP6 ATP8 from 6,297 vertebrate species. Dots represent each of the 6,297  
585 analysed vertebrate species, with red (deep-sea hatchetfish) and green (other fish  
586 species) dots highlighting genes with inverted AT and GC skews. The plots for the  
587 remaining protein-coding genes are provided in fig.6.

588

589 FIG.S5. Strand-specific 4-fold redundant sites GC/AT skew estimations for all  
590 protein-coding genes, for all mitogenomes of notothenioid fishes available on NCBI.

591 Coloured circles represent the mitochondrial gene orders described by Papetti et al.

592 2021. Species not studied by Papetti et al. 2021 are in the black box. Mitogenomes  
593 with an inversion of the ND1 gene are highlighted in a thick red box.

594

595 FIG.S6. GenomeScope2 k-mer (21) distributions displaying estimation of genome  
596 size (len), homozygosity (aa), heterozygosity (ab), mean k-mer coverage for  
597 heterozygous bases (kcov), read error rate (err), the average rate of read  
598 duplications (dup), k-mer size used on the run (k:), and ploidy (p:) for *Argyropelecus*  
599 *aculeatus* (left) and *Sternoptyx diaphana* (right).

600

601 FIG.S7. Artemis read coverage plot distribution across the assembled marine hatchet  
602 fish mitogenome assemblies.

603

604 Supplementary File 1 - MEME - Motif discovery results, including the sequences of  
605 the inferred conserved motif representing CSB-II and, in some species, CSB-III. The  
606 results include all the CR of the fish species studied in Satoh et al (2016) (using the  
607 same abbreviated nomenclature), as well as the non-coding regions deep-sea  
608 marine hatchet fish species *Sternoptyx obscura*, *Sternoptyx diaphana*, *Argyropelecus*  
609 *aculeatus*, the Stomiiformes species *Diplophos taenia*, and the Antarctic  
610 Trematominae species *Pagothenia borchgrevinki*.

611 Supplementary File 2 - COI alignment including 261 sequences from 26 distinct  
612 deep-sea marine hatchetfish species and the outgroup species, i.e., *Coregonus*  
613 *clupeiformis* (Mitchill, 1818) (total length of 652 bp).

## 614 References

- 615 Arrondo NV, Gomes-dos-Santos A, Román Marcote E, Pérez M, Froufe E, Castro LFC. 2020. A new  
616 gene order in the mitochondrial genome of the deep-sea diaphanous hatchet fish *Sternoptyx*  
617 *diaphana* Hermann, 1781 (Stomiiformes: Sternoptychidae). *Mitochondrial DNA B Resour*  
618 [Internet] 5:2859–2861. Available from:  
619 <https://www.tandfonline.com/doi/full/10.1080/23802359.2020.1790325>
- 620 Bailey TL, Elkan C. 1994. Fitting a mixture model by expectation maximization to discover motifs in  
621 biopolymers. *Proceedings of the Second International Conference on Intelligent Systems for*  
622 *Molecular Biology* 2:28–36.
- 623 Bankevich A, Nurk S, Antipov D, Gurevich AA, Dvorkin M, Kulikov AS, Lesin VM, Nikolenko SI, Pham S,  
624 Prjibelski AD, et al. 2012. SPAdes: A New Genome Assembly Algorithm and Its Applications to  
625 Single-Cell Sequencing. *Journal of Computational Biology* [Internet] 19:455–477. Available from:  
626 <http://www.liebertpub.com/doi/10.1089/cmb.2012.0021>
- 627 Barshad G, Marom S, Cohen T, Mishmar D. 2018. Mitochondrial DNA Transcription and Its  
628 Regulation: An Evolutionary Perspective. *Trends in Genetics* 34:682–692.
- 629 Blumberg A, Rice EJ, Kundaje A, Danko CG, Mishmar D. 2017. Initiation of mtDNA transcription is  
630 followed by pausing, and diverges across human cell types and during evolution. *Genome Res*  
631 27:362–373.
- 632 Blumberg A, Sailaja BS, Kundaje A, Levin L, Dadon S, Shmorak S, Shaulian E, Meshorer E, Mishmar D.  
633 2014. Transcription Factors Bind Negatively Selected Sites within Human mtDNA Genes.  
634 *Genome Biol Evol* [Internet] 6:2634–2646. Available from:  
635 <https://academic.oup.com/gbe/article/6/10/2634/610683>

- 636 Bolger AM, Lohse M, Usadel B. 2014. Trimmomatic: a flexible trimmer for Illumina sequence data.  
637 *Bioinformatics* [Internet] 30:2114–2120. Available from:  
638 <https://academic.oup.com/bioinformatics/article-lookup/doi/10.1093/bioinformatics/btu170>
- 639 Boore JL. 1999. Animal mitochondrial genomes. *Nucleic Acids Res* [Internet] 27:1767–1780. Available  
640 from: <https://academic.oup.com/nar/article/27/8/1767/2847916>
- 641 Calcino A, Baranyi C, 1, Wanninger A. 2020. Heteroplasmy and repeat expansion in the plant-like  
642 mitochondrial genome of a bivalve mollusc. *bioRxiv* [Internet]:2020.09.23.310516. Available  
643 from: <https://www.biorxiv.org/content/10.1101/2020.09.23.310516v2>
- 644 Capella-Gutiérrez S, Silla-Martínez JM, Gabaldón T. 2009. trimAl: A tool for automated alignment  
645 trimming in large-scale phylogenetic analyses. *Bioinformatics* [Internet] 25:1972–1973.  
646 Available from: <https://academic.oup.com/bioinformatics/article/25/15/1972/213148>
- 647 Carnevale G. 2008. Miniature deep-sea hatchetfish (Teleostei: Stomiiformes) from the Miocene of  
648 Italy. *Geol Mag* [Internet] 145:73–84. Available from:  
649 [https://www.cambridge.org/core/journals/geological-magazine/article/miniature-deepsea-](https://www.cambridge.org/core/journals/geological-magazine/article/miniature-deepsea-hatchetfish-teleostei-stomiiformes-from-the-miocene-of-italy/F6121BE08716E80EA7731CC94A62DAB6)  
650 [hatchetfish-teleostei-stomiiformes-from-the-miocene-of-](https://www.cambridge.org/core/journals/geological-magazine/article/miniature-deepsea-hatchetfish-teleostei-stomiiformes-from-the-miocene-of-italy/F6121BE08716E80EA7731CC94A62DAB6)  
651 [italy/F6121BE08716E80EA7731CC94A62DAB6](https://www.cambridge.org/core/journals/geological-magazine/article/miniature-deepsea-hatchetfish-teleostei-stomiiformes-from-the-miocene-of-italy/F6121BE08716E80EA7731CC94A62DAB6)
- 652 Carver T, Harris SR, Berriman M, Parkhill J, McQuillan JA. 2012. Artemis: an integrated platform for  
653 visualization and analysis of high-throughput sequence-based experimental data. *Bioinformatics*  
654 [Internet] 28:464–469. Available from:  
655 <https://academic.oup.com/bioinformatics/article/28/4/464/213043>
- 656 Clayton DA. 1982. Replication of animal mitochondrial DNA. *Cell* 28:693–705.
- 657 Coad BW. 2019. Family Sternoptychidae – Marine Hatchetfishes, haches d’argent. *Marine Fishes of*  
658 *Arctic Canada*:305–307.

- 659 Eduardo LN, Bertrand A, Mincarone MM, Santos L V., Frédou T, Assunção R V., Silva A, Ménard F,  
660 Schwamborn R, Le Loc'h F, et al. 2020. Hatchetfishes (Stomiiformes: Sternoptychidae)  
661 biodiversity, trophic ecology, vertical niche partitioning and functional roles in the western  
662 Tropical Atlantic. *Prog Oceanogr* 187:102389.
- 663 Fonseca MM, Harris DJ, Posada D. 2014. The Inversion of the Control Region in Three Mitogenomes  
664 Provides Further Evidence for an Asymmetric Model of Vertebrate mtDNA Replication. *PLoS*  
665 *One* [Internet] 9:e106654. Available from:  
666 <https://journals.plos.org/plosone/article?id=10.1371/journal.pone.0106654>
- 667 Fonseca MM, Posada D, Harris DJ. 2008. Inverted Replication of Vertebrate Mitochondria. *Mol Biol*  
668 *Evol* [Internet] 25:805–808. Available from: [https://academic.oup.com/mbe/article-](https://academic.oup.com/mbe/article-lookup/doi/10.1093/molbev/msn050)  
669 [lookup/doi/10.1093/molbev/msn050](https://academic.oup.com/mbe/article-lookup/doi/10.1093/molbev/msn050)
- 670 Formenti G, Rhie A, Balacco J, Haase B, Mountcastle J, Fedrigo O, Brown S, Capodiferro MR, Al-Ajli  
671 FO, Ambrosini R, et al. 2021. Complete vertebrate mitogenomes reveal widespread repeats and  
672 gene duplications. *Genome Biol* [Internet] 22:1–22. Available from:  
673 <https://genomebiology.biomedcentral.com/articles/10.1186/s13059-021-02336-9>
- 674 Francino MP, Ochman H. 1997. Strand asymmetries in DNA evolution. *Trends in Genetics* 13:240–  
675 245.
- 676 Ghiselli F, Gomes-dos-Santos A, Adema CM, Lopes-Lima M, Sharbrough J, Boore JL. 2021. Molluscan  
677 mitochondrial genomes break the rules. *Philosophical Transactions of the Royal Society B:*  
678 *Biological Sciences* [Internet] 376:20200159. Available from:  
679 <https://royalsocietypublishing.org/doi/10.1098/rstb.2020.0159>
- 680 Gissi C, Pesole G, Mastrototaro F, Iannelli F, Guida V, Griggio F. 2010. Hypervariability of Ascidian  
681 Mitochondrial Gene Order: Exposing the Myth of Deuterostome Organelle Genome Stability.

- 682 *Mol Biol Evol* [Internet] 27:211–215. Available from:  
683 <https://academic.oup.com/mbe/article/27/2/211/968133>
- 684 Gjoesaeter J, Kawaguchi K. 1980. A review of the world resources of mesopelagic fish. *FAO Fisheries*  
685 *Technical Papers (FAO)*.
- 686 Gong L, Shi W, Wang ZM, Miao XG, Kong XY. 2013. Control region translocation and a tRNA gene  
687 inversion in the mitogenome of *Paraplagusia japonica* (Pleuronectiformes: Cynoglossidae).  
688 <http://dx.doi.org/10.3109/19401736.2013.773984> [Internet] 24:671–673. Available from:  
689 <https://www.tandfonline.com/doi/abs/10.3109/19401736.2013.773984>
- 690 Haddock SHD, Moline MA, Case JF. 2009. Bioluminescence in the Sea.  
691 <https://doi.org/10.1146/annurev-marine-120308-081028> [Internet] 2:443–493. Available from:  
692 <https://www.annualreviews.org/doi/abs/10.1146/annurev-marine-120308-081028>
- 693 Howell WH, Krueger WH. 1987. Family Sternoptychidae, marine hatchetfishes and related species.  
694 Smithsonian contributions to zoology. In: GIBBS RH, KRUEGER WH, editors. Biology of Midwater  
695 Fishes of the Bermuda Ocean Acre. Vol. 452. Washington, D.C.: Smithsonian Institution Press. p.  
696 32–50.
- 697 Ijichi M, Takano T, Hasegawa M, Yashiki H, Kogure K, Kojima S, Yoshizawa S. 2018. The complete  
698 mitochondrial genome of the longfin dragonfish *Tactostoma macropus* (Stomiiformes:  
699 Stomiidae). *Mitochondrial DNA B Resour* [Internet] 3:486–487. Available from:  
700 <https://www.tandfonline.com/doi/full/10.1080/23802359.2018.1464411>
- 701 Jin JJ, Yu W Bin, Yang JB, Song Y, Depamphilis CW, Yi TS, Li DZ. 2020. GetOrganelle: A fast and  
702 versatile toolkit for accurate de novo assembly of organelle genomes. *Genome Biol* [Internet]  
703 21:241. Available from: [https://genomebiology.biomedcentral.com/articles/10.1186/s13059-](https://genomebiology.biomedcentral.com/articles/10.1186/s13059-020-02154-5)  
704 [020-02154-5](https://genomebiology.biomedcentral.com/articles/10.1186/s13059-020-02154-5)

- 705 Kalyaanamoorthy S, Minh BQ, Wong TKF, Von Haeseler A, Jermiin LS. 2017. ModelFinder: Fast model  
706 selection for accurate phylogenetic estimates. *Nat Methods* [Internet] 14:587–589. Available  
707 from: <http://www.nature.com/articles/nmeth.4285>
- 708 Katoh K, Standley DM. 2013. MAFFT multiple sequence alignment software version 7: Improvements  
709 in performance and usability. *Mol Biol Evol* [Internet] 30:772–780. Available from:  
710 <https://academic.oup.com/mbe/article-lookup/doi/10.1093/molbev/mst010>
- 711 Kennedy SR, Salk JJ, Schmitt MW, Loeb LA. 2013. Ultra-Sensitive Sequencing Reveals an Age-Related  
712 Increase in Somatic Mitochondrial Mutations That Are Inconsistent with Oxidative Damage.  
713 *PLoS Genet* 9:e1003794.
- 714 Kolesnikov AA, Gerasimov ES. 2012. Diversity of mitochondrial genome organization. *Biochemistry*  
715 (*Moscow*) [Internet] 77:1424–1435. Available from:  
716 <https://link.springer.com/article/10.1134/S0006297912130020>
- 717 Kong X, Dong X, Zhang Y, Shi W, Wang Z, Yu Z. 2009. A novel rearrangement in the mitochondrial  
718 genome of tongue sole, *Cynoglossus semilaevis*: Control region translocation and a tRNA gene  
719 inversion. *Genome* [Internet] 52:975–984. Available from:  
720 <https://cdnsiencepub.com/doi/abs/10.1139/G09-069>
- 721 Krönström J, Holmgren S, Baguet F, Salpietro L, Malfet J. 2005. Nitric oxide in control of  
722 luminescence from hatchetfish (*Argyropspectus hemigymnus*) photophores. *Journal of*  
723 *Experimental Biology* [Internet] 208:2951–2961. Available from:  
724 [https://journals.biologists.com/jeb/article/208/15/2951/15770/Nitric-oxide-in-control-of-](https://journals.biologists.com/jeb/article/208/15/2951/15770/Nitric-oxide-in-control-of-luminescence-from)  
725 luminescence-from
- 726 Lee WJ, Conroy J, Howell WH, Kocher TD. 1995. Structure and evolution of teleost mitochondrial  
727 control regions. *J Mol Evol* [Internet] 41:54–66. Available from:  
728 <https://link.springer.com/article/10.1007/BF00174041>

- 729 Li H. 2013. Aligning sequence reads, clone sequences and assembly contigs with BWA-MEM.  
730 Available from: <http://arxiv.org/abs/1303.3997>
- 731 Meng G, Li Y, Yang C, Liu S. 2019. MitoZ: a toolkit for animal mitochondrial genome assembly,  
732 annotation and visualization. *Nucleic Acids Res* [Internet] 47:e63–e63. Available from:  
733 <https://doi.org/10.1093/nar/gkz173>
- 734 Minhas BF, Beck EA, Cheng C-HC, Catchen J. 2023. Novel mitochondrial genome rearrangements  
735 including duplications and extensive heteroplasmy could underlie temperature adaptations in  
736 Antarctic notothenioid fishes. *Sci Rep* 13:6939.
- 737 Montaña-Lozano P, Moreno-Carmona M, Ochoa-Capera M, Medina NS, Boore JL, Prada CF. 2022.  
738 Comparative genomic analysis of vertebrate mitochondrial reveals a differential of  
739 rearrangements rate between taxonomic class. *Scientific Reports* 2022 12:1 [Internet] 12:1–13.  
740 Available from: <https://www.nature.com/articles/s41598-022-09512-2>
- 741 Nelson JS. 2016. *Fishes of the World*. 5th ed. (JohnWiley and Sons, editor.). New York, NY
- 742 Nguyen LT, Schmidt HA, Von Haeseler A, Minh BQ. 2015. IQ-TREE: A fast and effective stochastic  
743 algorithm for estimating maximum-likelihood phylogenies. *Mol Biol Evol* [Internet] 32:268–274.  
744 Available from: <https://academic.oup.com/mbe/article-lookup/doi/10.1093/molbev/msu300>
- 745 Nurk S, Meleshko D, Korobeynikov A, Pevzner PA. 2017. metaSPAdes: a new versatile metagenomic  
746 assembler. *Genome Res* [Internet] 27:824–834. Available from:  
747 <https://genome.cshlp.org/content/27/5/824.full>
- 748 Papetti C, Babbucci M, Dettai A, Basso A, Lucassen M, Harms L, Bonillo C, Heindler FM, Patarnello T,  
749 Negrisolo E. 2021. Not Frozen in the Ice: Large and Dynamic Rearrangements in the  
750 Mitochondrial Genomes of the Antarctic Fish. *Genome Biol Evol* [Internet] 13. Available from:  
751 <https://academic.oup.com/gbe/article/13/3/evab017/6133229>



- 752 Parey E, Louis A, Montfort J, Guiguen Y, Crollius HR, Berthelot C. 2022. An atlas of fish genome  
753 evolution reveals delayed rediploidization following the teleost whole-genome duplication.  
754 *Genome Res* [Internet] 32:1685–1697. Available from:  
755 <https://genome.cshlp.org/content/32/9/1685.full>
- 756 Ranallo-Benavidez TR, Jaron KS, Schatz MC. 2020. GenomeScope 2.0 and Smudgeplot for reference-  
757 free profiling of polyploid genomes. *Nat Commun* [Internet] 11:1–10. Available from:  
758 <https://doi.org/10.1038/s41467-020-14998-3>
- 759 Saccone C, Gissi C, Reyes A, Larizza A, Sbisà E, Pesole G. 2002. Mitochondrial DNA in metazoa: degree  
760 of freedom in a frozen event. *Gene* 286:3–12.
- 761 Satoh TP, Miya M, Mabuchi K, Nishida M. 2016. Structure and variation of the mitochondrial genome  
762 of fishes. *BMC Genomics* [Internet] 17:719. Available from:  
763 <http://bmcbgenomics.biomedcentral.com/articles/10.1186/s12864-016-3054-y>
- 764 Sharbrough J, Bankers L, Cook E, Fields PD, Jalinsky J, Mcelroy KE, Neiman M, Logsdonjr JM, Boore JL.  
765 2023. Single-molecule Sequencing of an Animal Mitochondrial Genome Reveals Chloroplast-like  
766 Architecture and Repeat-mediated Recombination. *Mol Biol Evol* [Internet] 40. Available from:  
767 <https://academic.oup.com/mbe/article/40/1/msad007/6980790>
- 768 Shtolz N, Mishmar D. 2023. The metazoan landscape of mitochondrial DNA gene order and content is  
769 shaped by selection and affects mitochondrial transcription. *Communications Biology* 2023 6:1  
770 [Internet] 6:1–15. Available from: <https://www.nature.com/articles/s42003-023-04471-4>
- 771 Wick RR, Holt KE. 2022. Polypolish: Short-read polishing of long-read bacterial genome assemblies.  
772 *PLoS Comput Biol* [Internet] 18:e1009802. Available from:  
773 <https://journals.plos.org/ploscompbiol/article?id=10.1371/journal.pcbi.1009802>

774 Wick RR, Judd LM, Gorrie CL, Holt KE. 2017. Unicycler: Resolving bacterial genome assemblies from  
775 short and long sequencing reads. Phillippy AM, editor. *PLoS Comput Biol* [Internet] 13:e1005595.  
776 Available from: <https://dx.plos.org/10.1371/journal.pcbi.1005595>

777 Wick RR, Schultz MB, Zobel J, Holt KE. 2015. Bandage: interactive visualization of de novo genome  
778 assemblies. *Bioinformatics* [Internet] 31:3350–3352. Available from:  
779 <https://doi.org/10.1093/bioinformatics/btv383>

780 Zhang J, Kan X, Miao G, Hu S, Sun Q, Tian W. 2020. qMGR: A new approach for quantifying  
781 mitochondrial genome rearrangement. *Mitochondrion* 52:20–23.

782 Zimin A V., Salzberg SL. 2020. The genome polishing tool POLCA makes fast and accurate corrections  
783 in genome assemblies. *PLoS Comput Biol* [Internet] 16:e1007981. Available from:  
784 <https://journals.plos.org/ploscompbiol/article?id=10.1371/journal.pcbi.1007981>

785

786

787

788





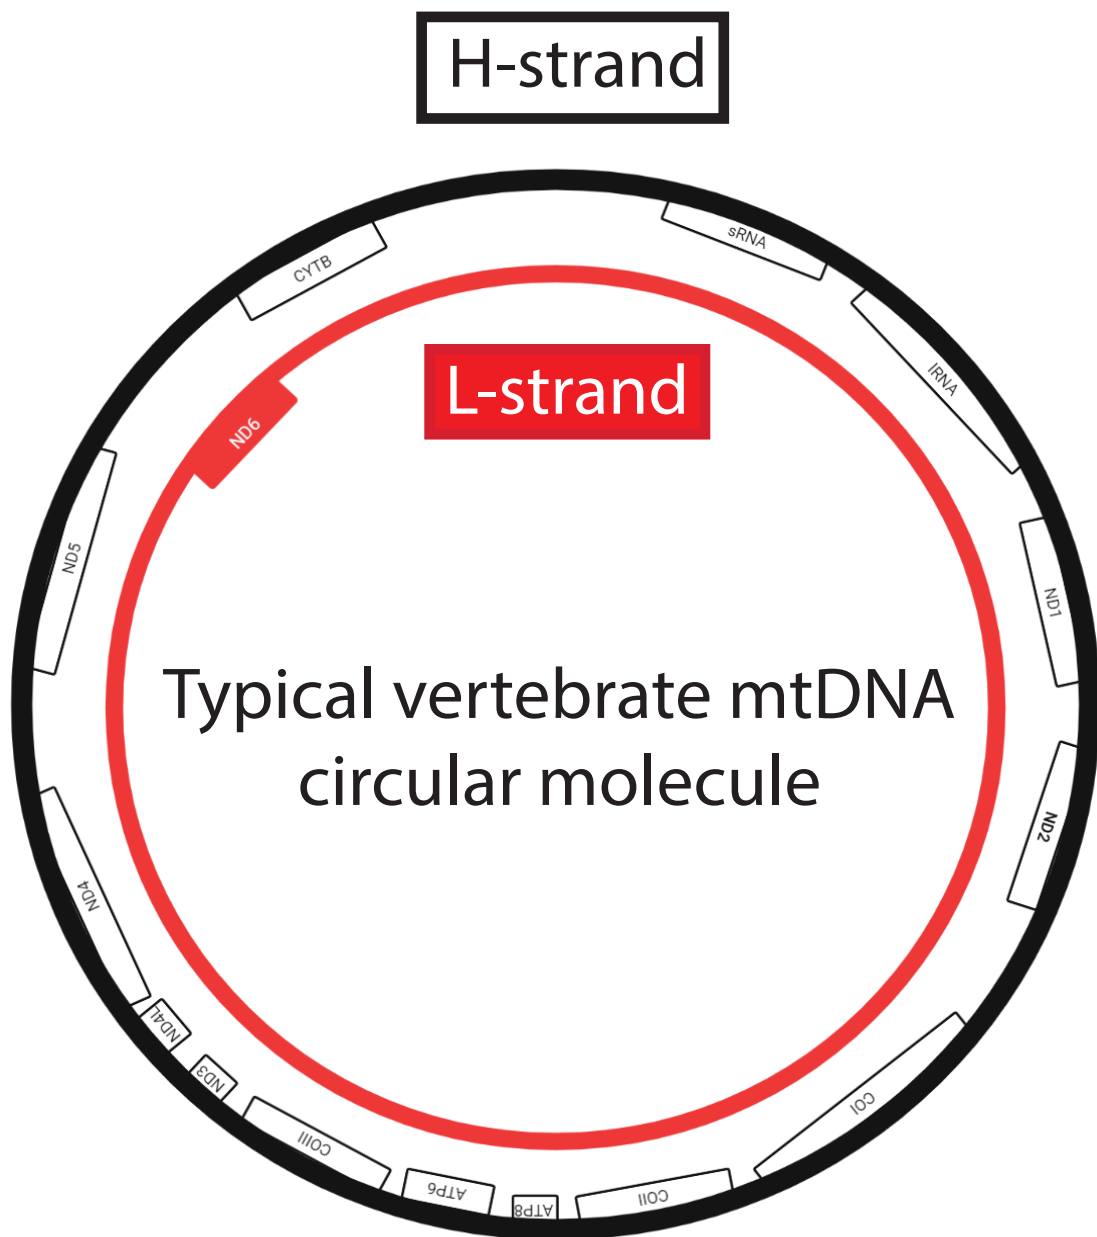

*Argyropelecus hemigymnus*

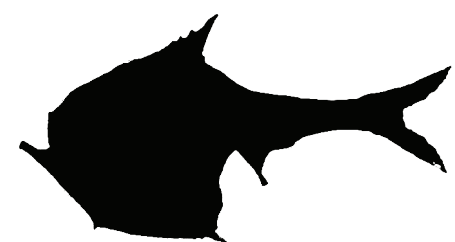

~20,747 kb

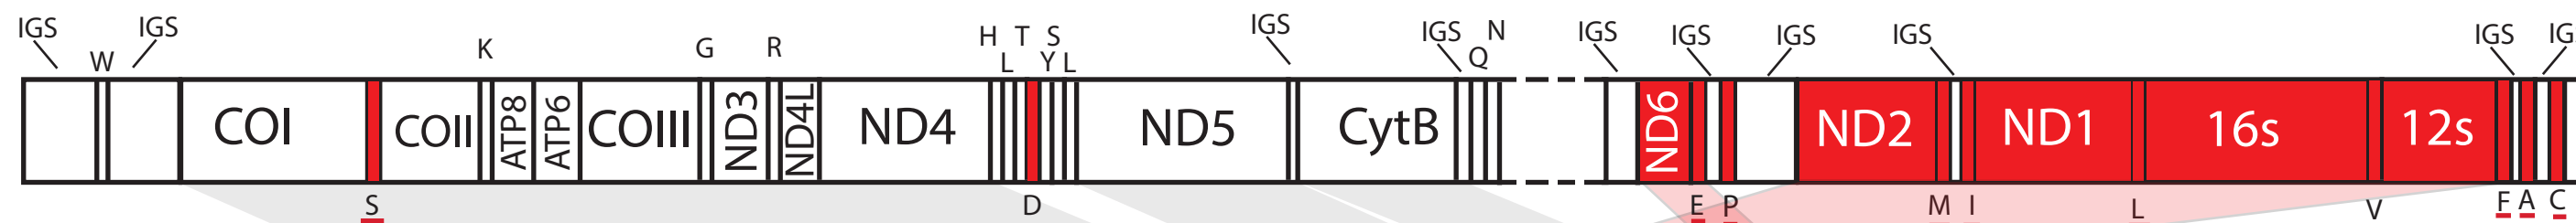

Typical vertebrate mtDNA

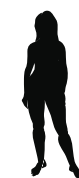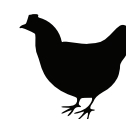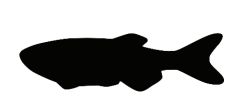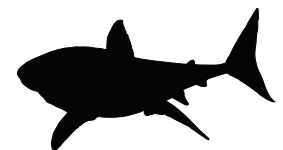

~16,000 kb

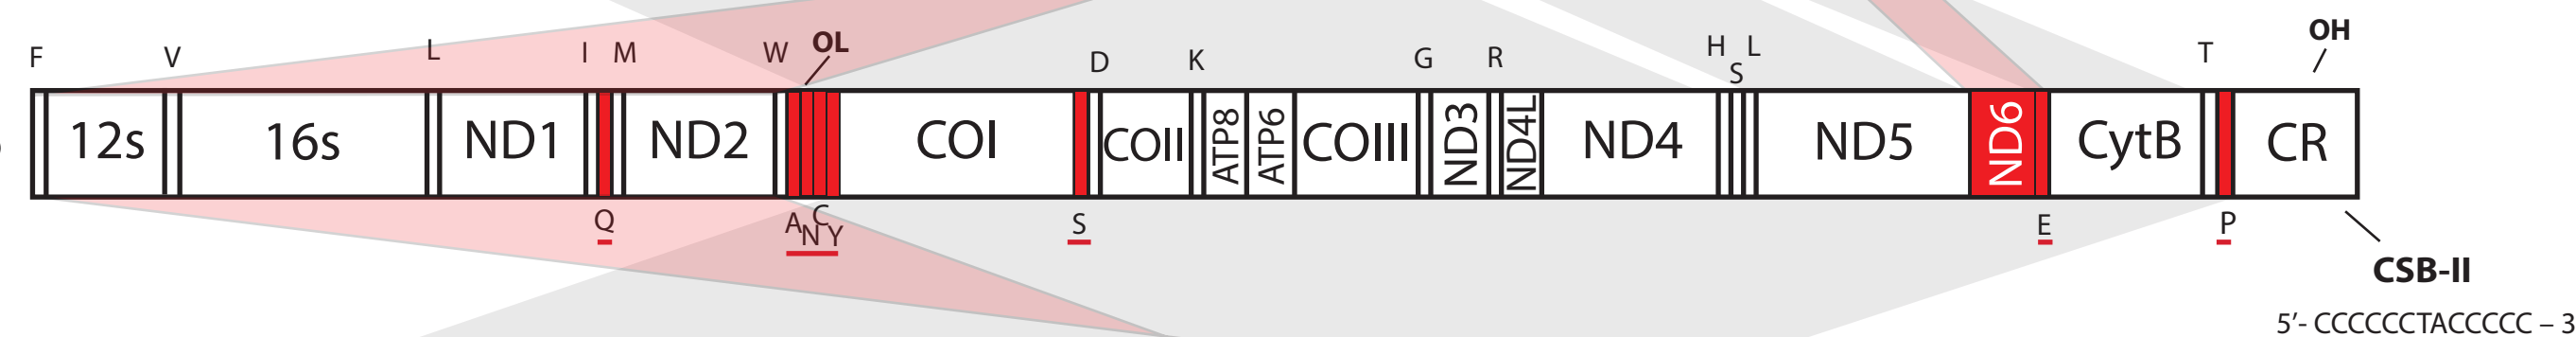

*Argyropelecus aculeatus*

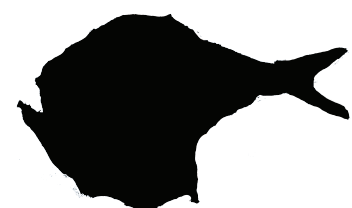

~23,291 kb

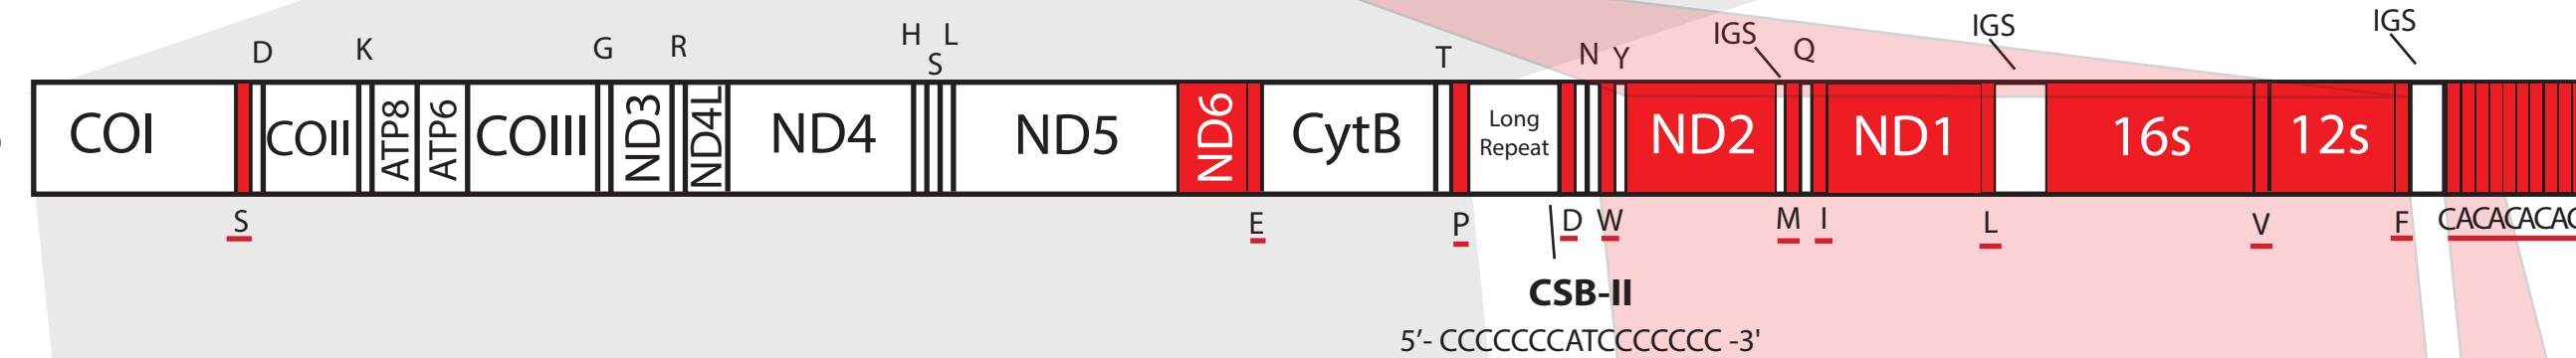

*Argyropelecus olfersii*

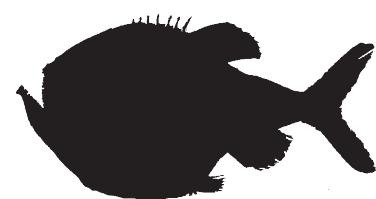

~16,414 kb

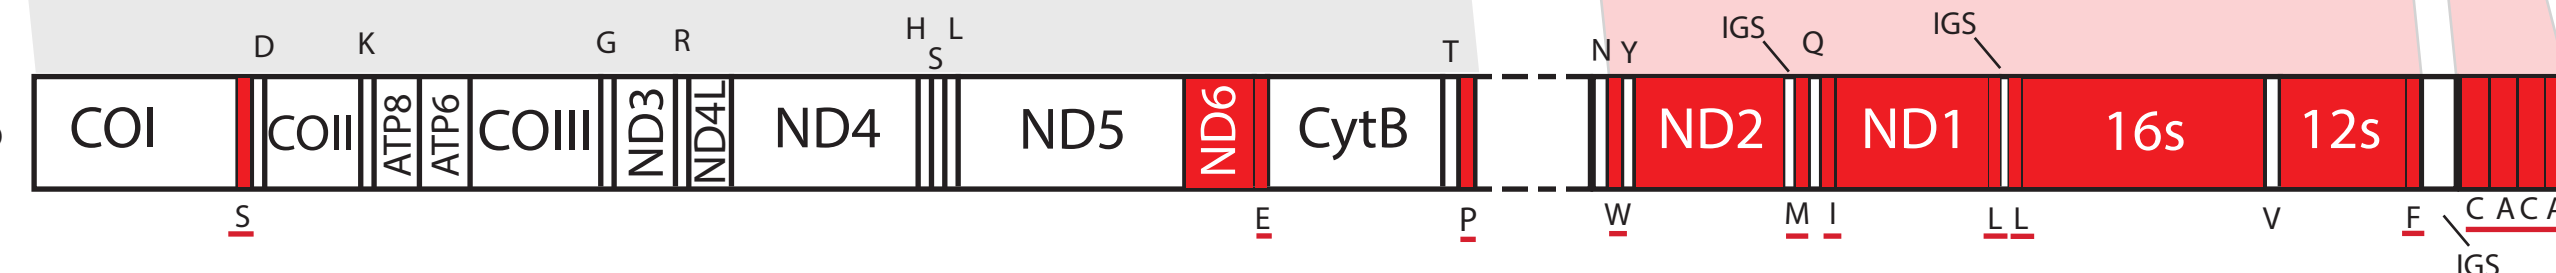

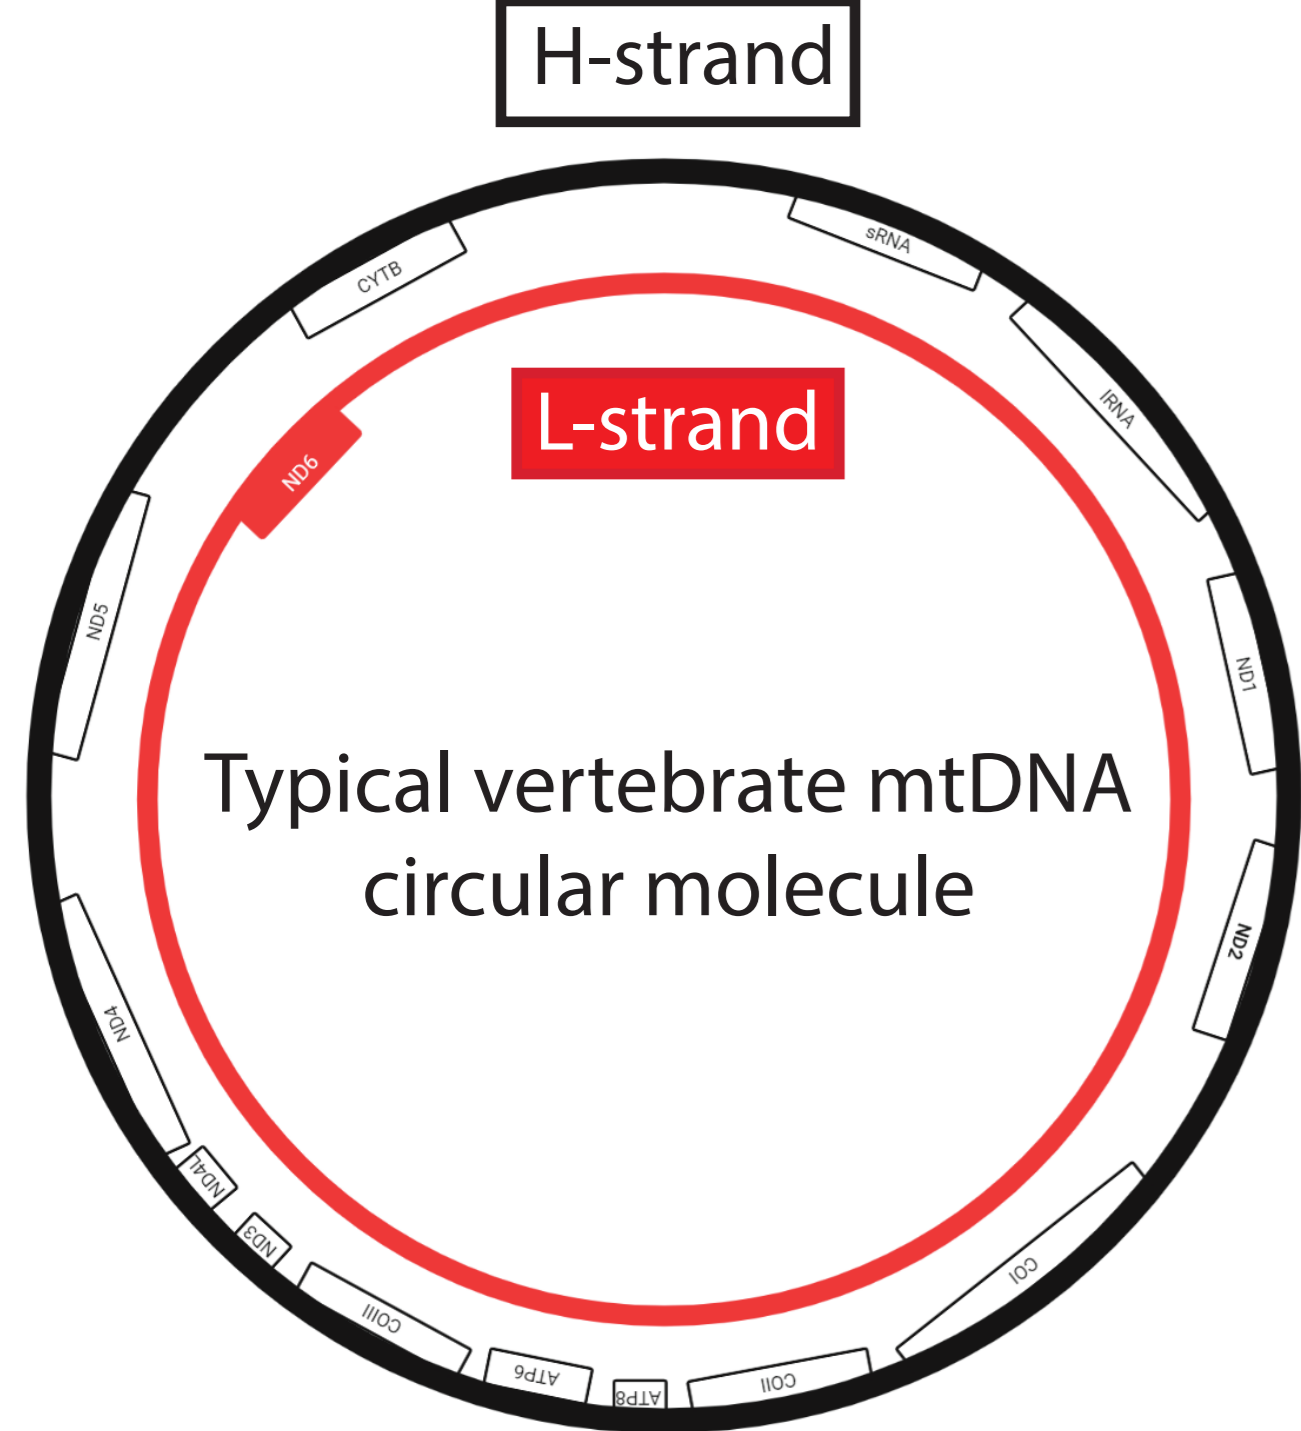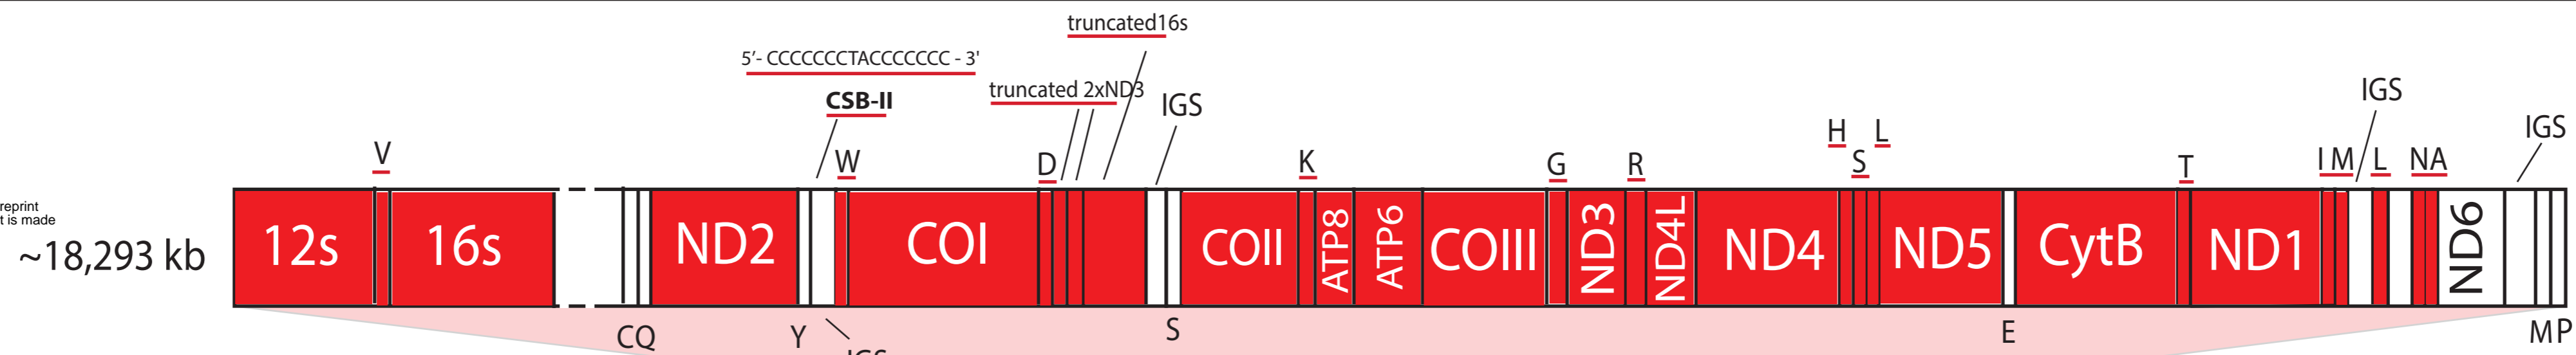

*Sternoptyx obscura*

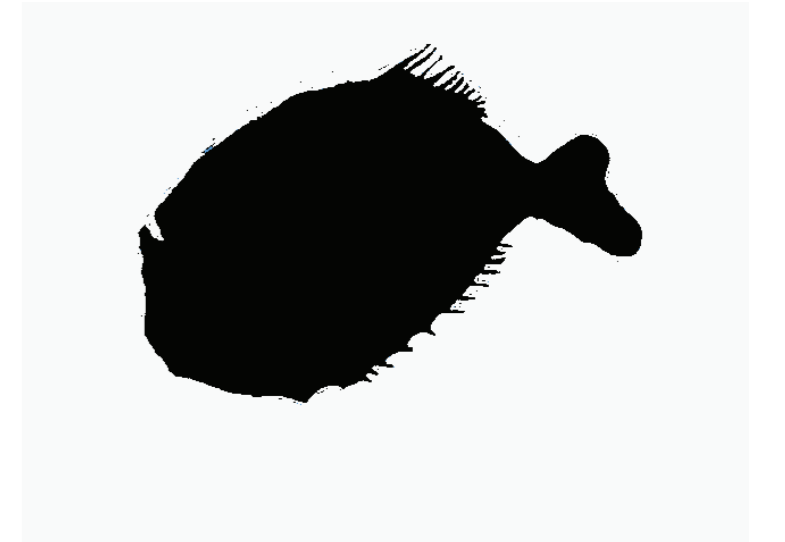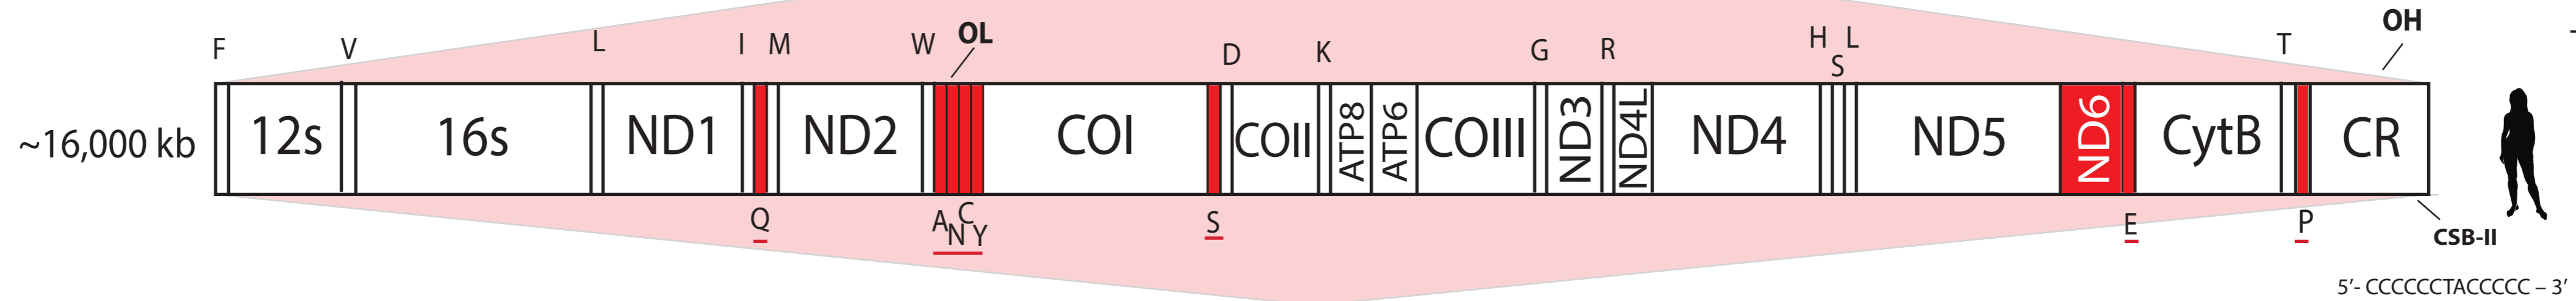

Typical vertebrate mtDNA

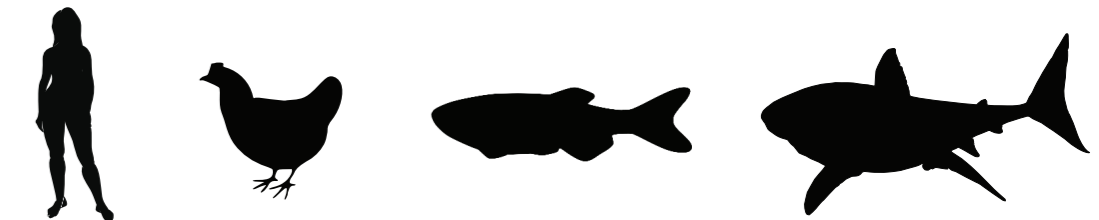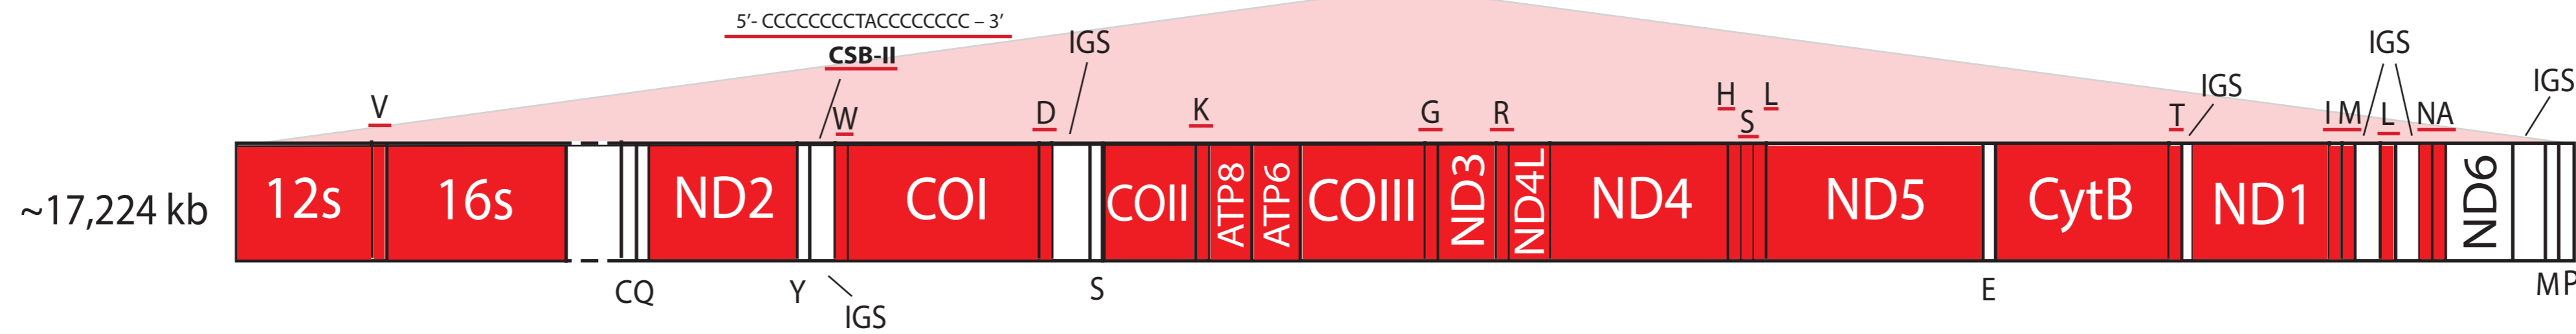

*Sternoptyx diaphana*

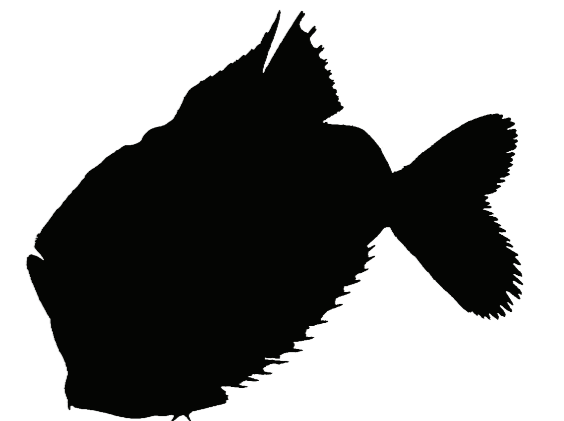

a)

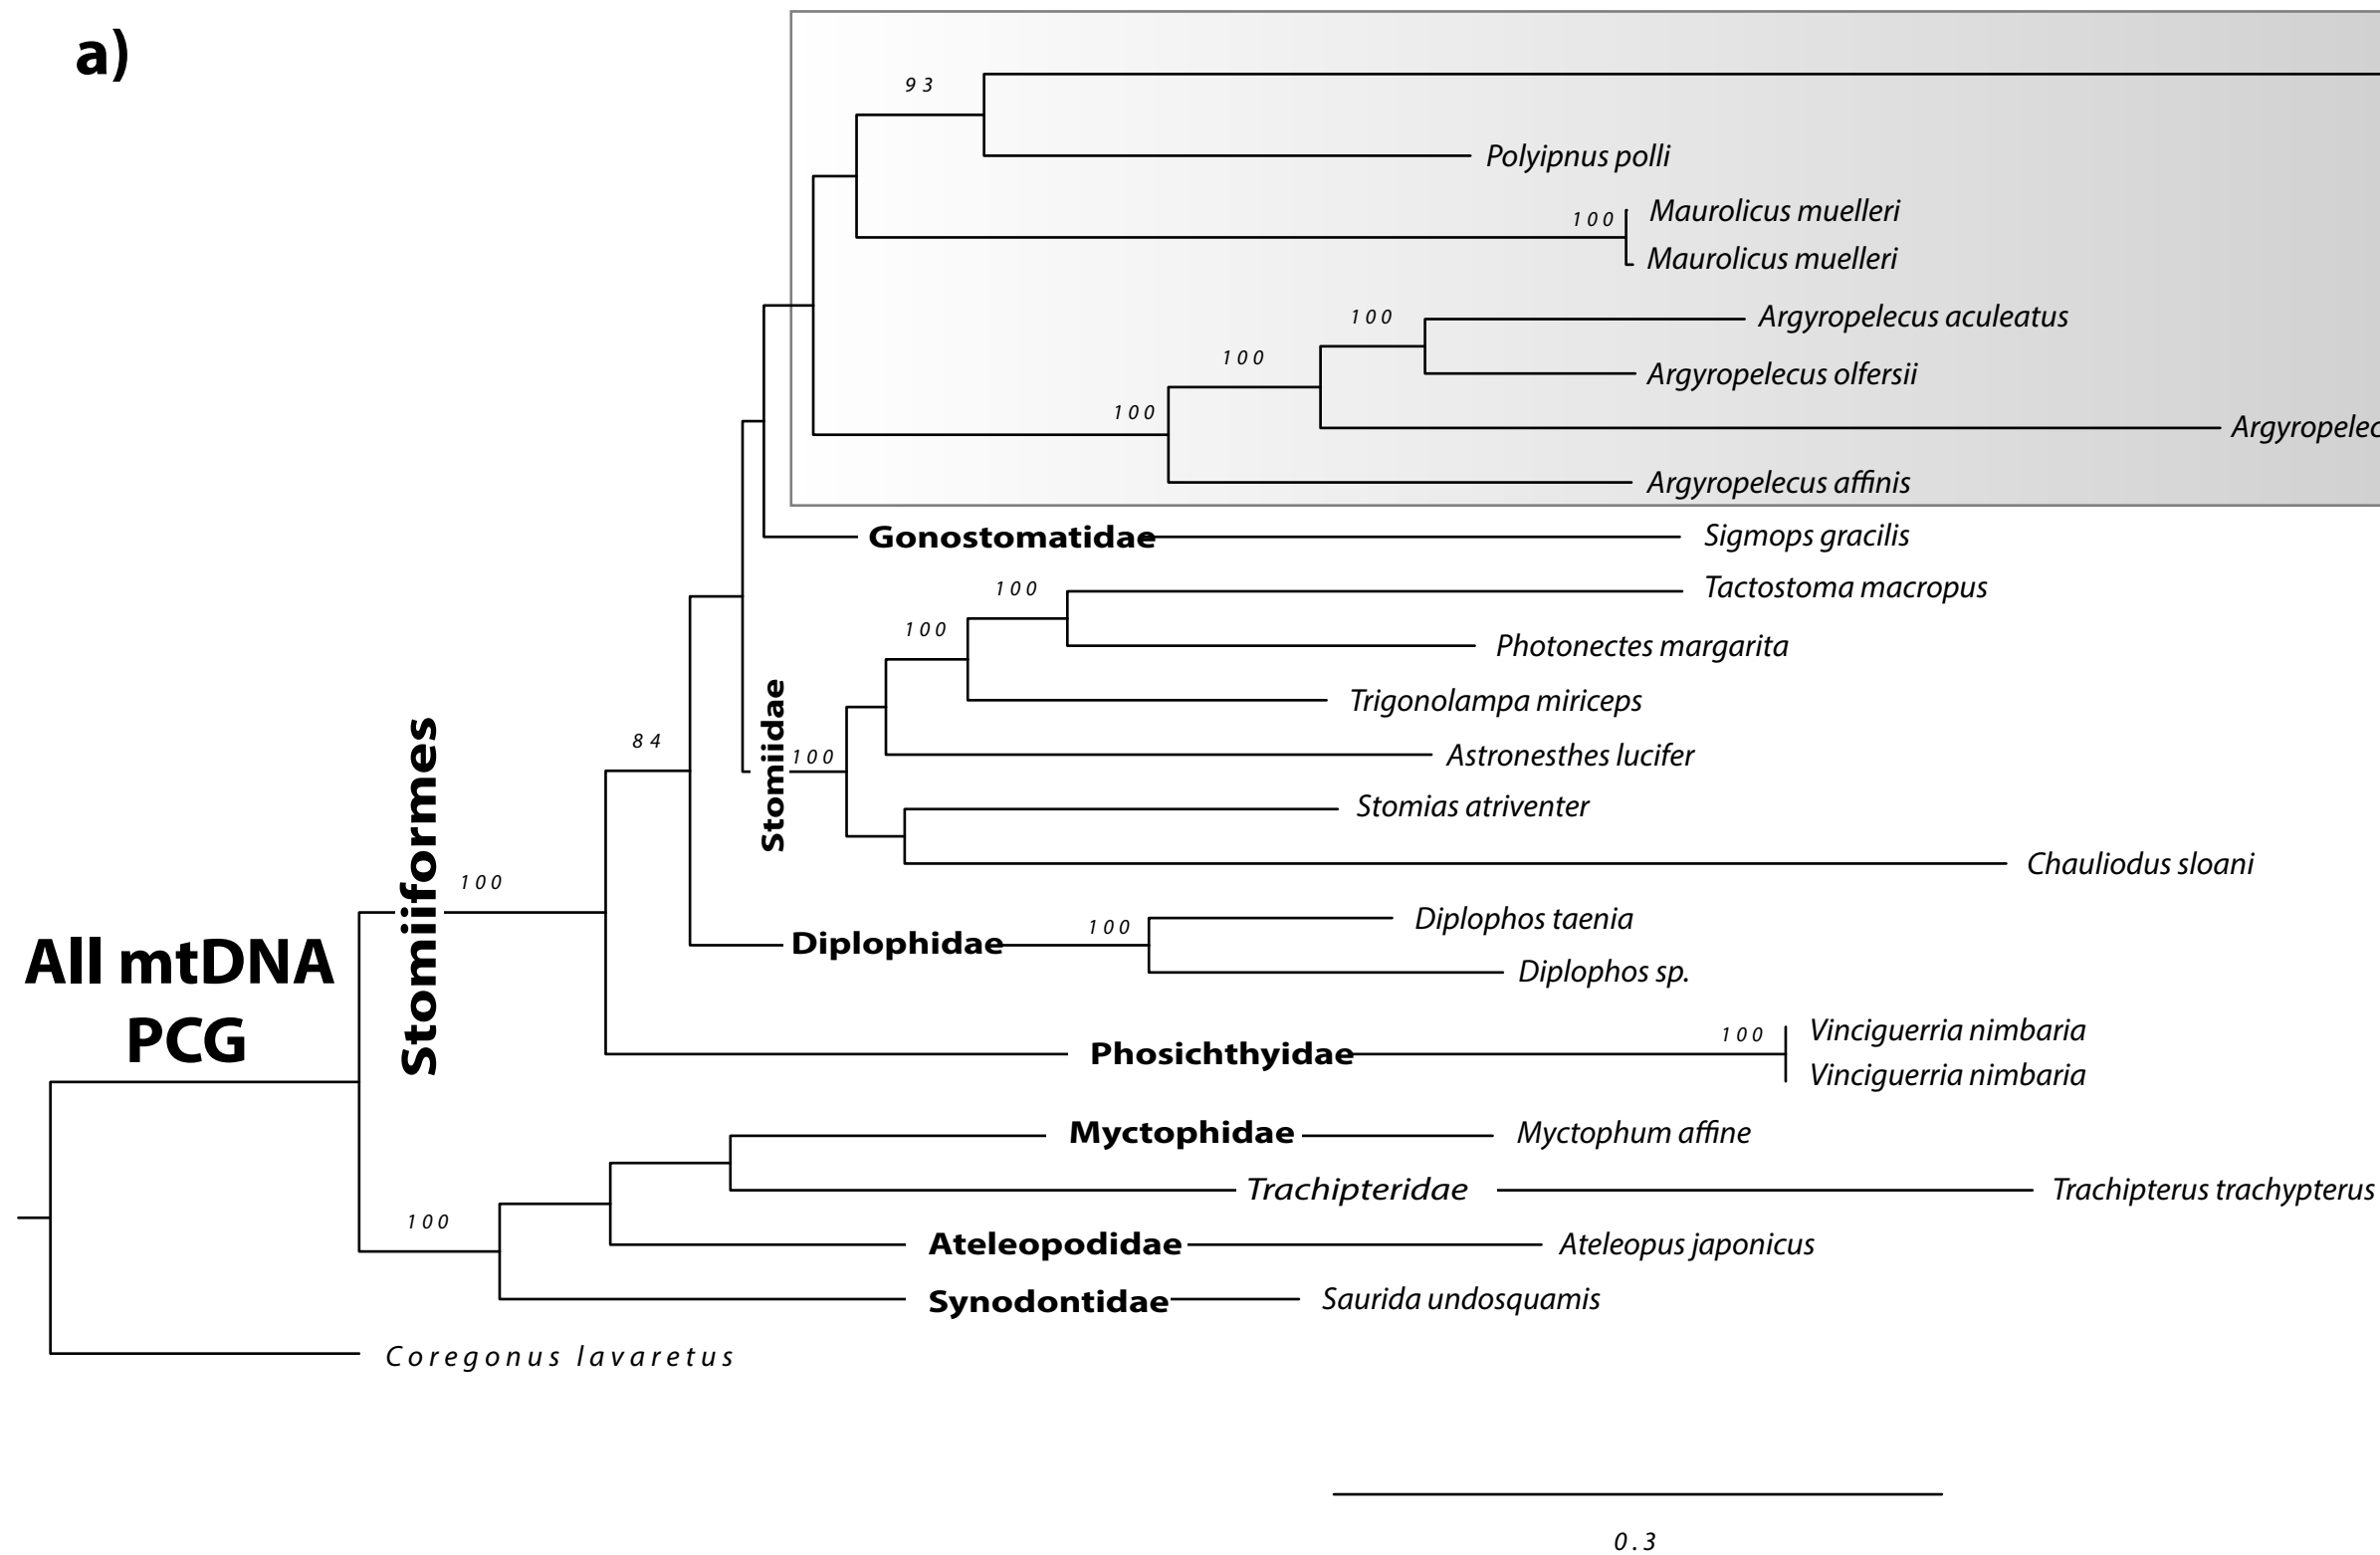

b)

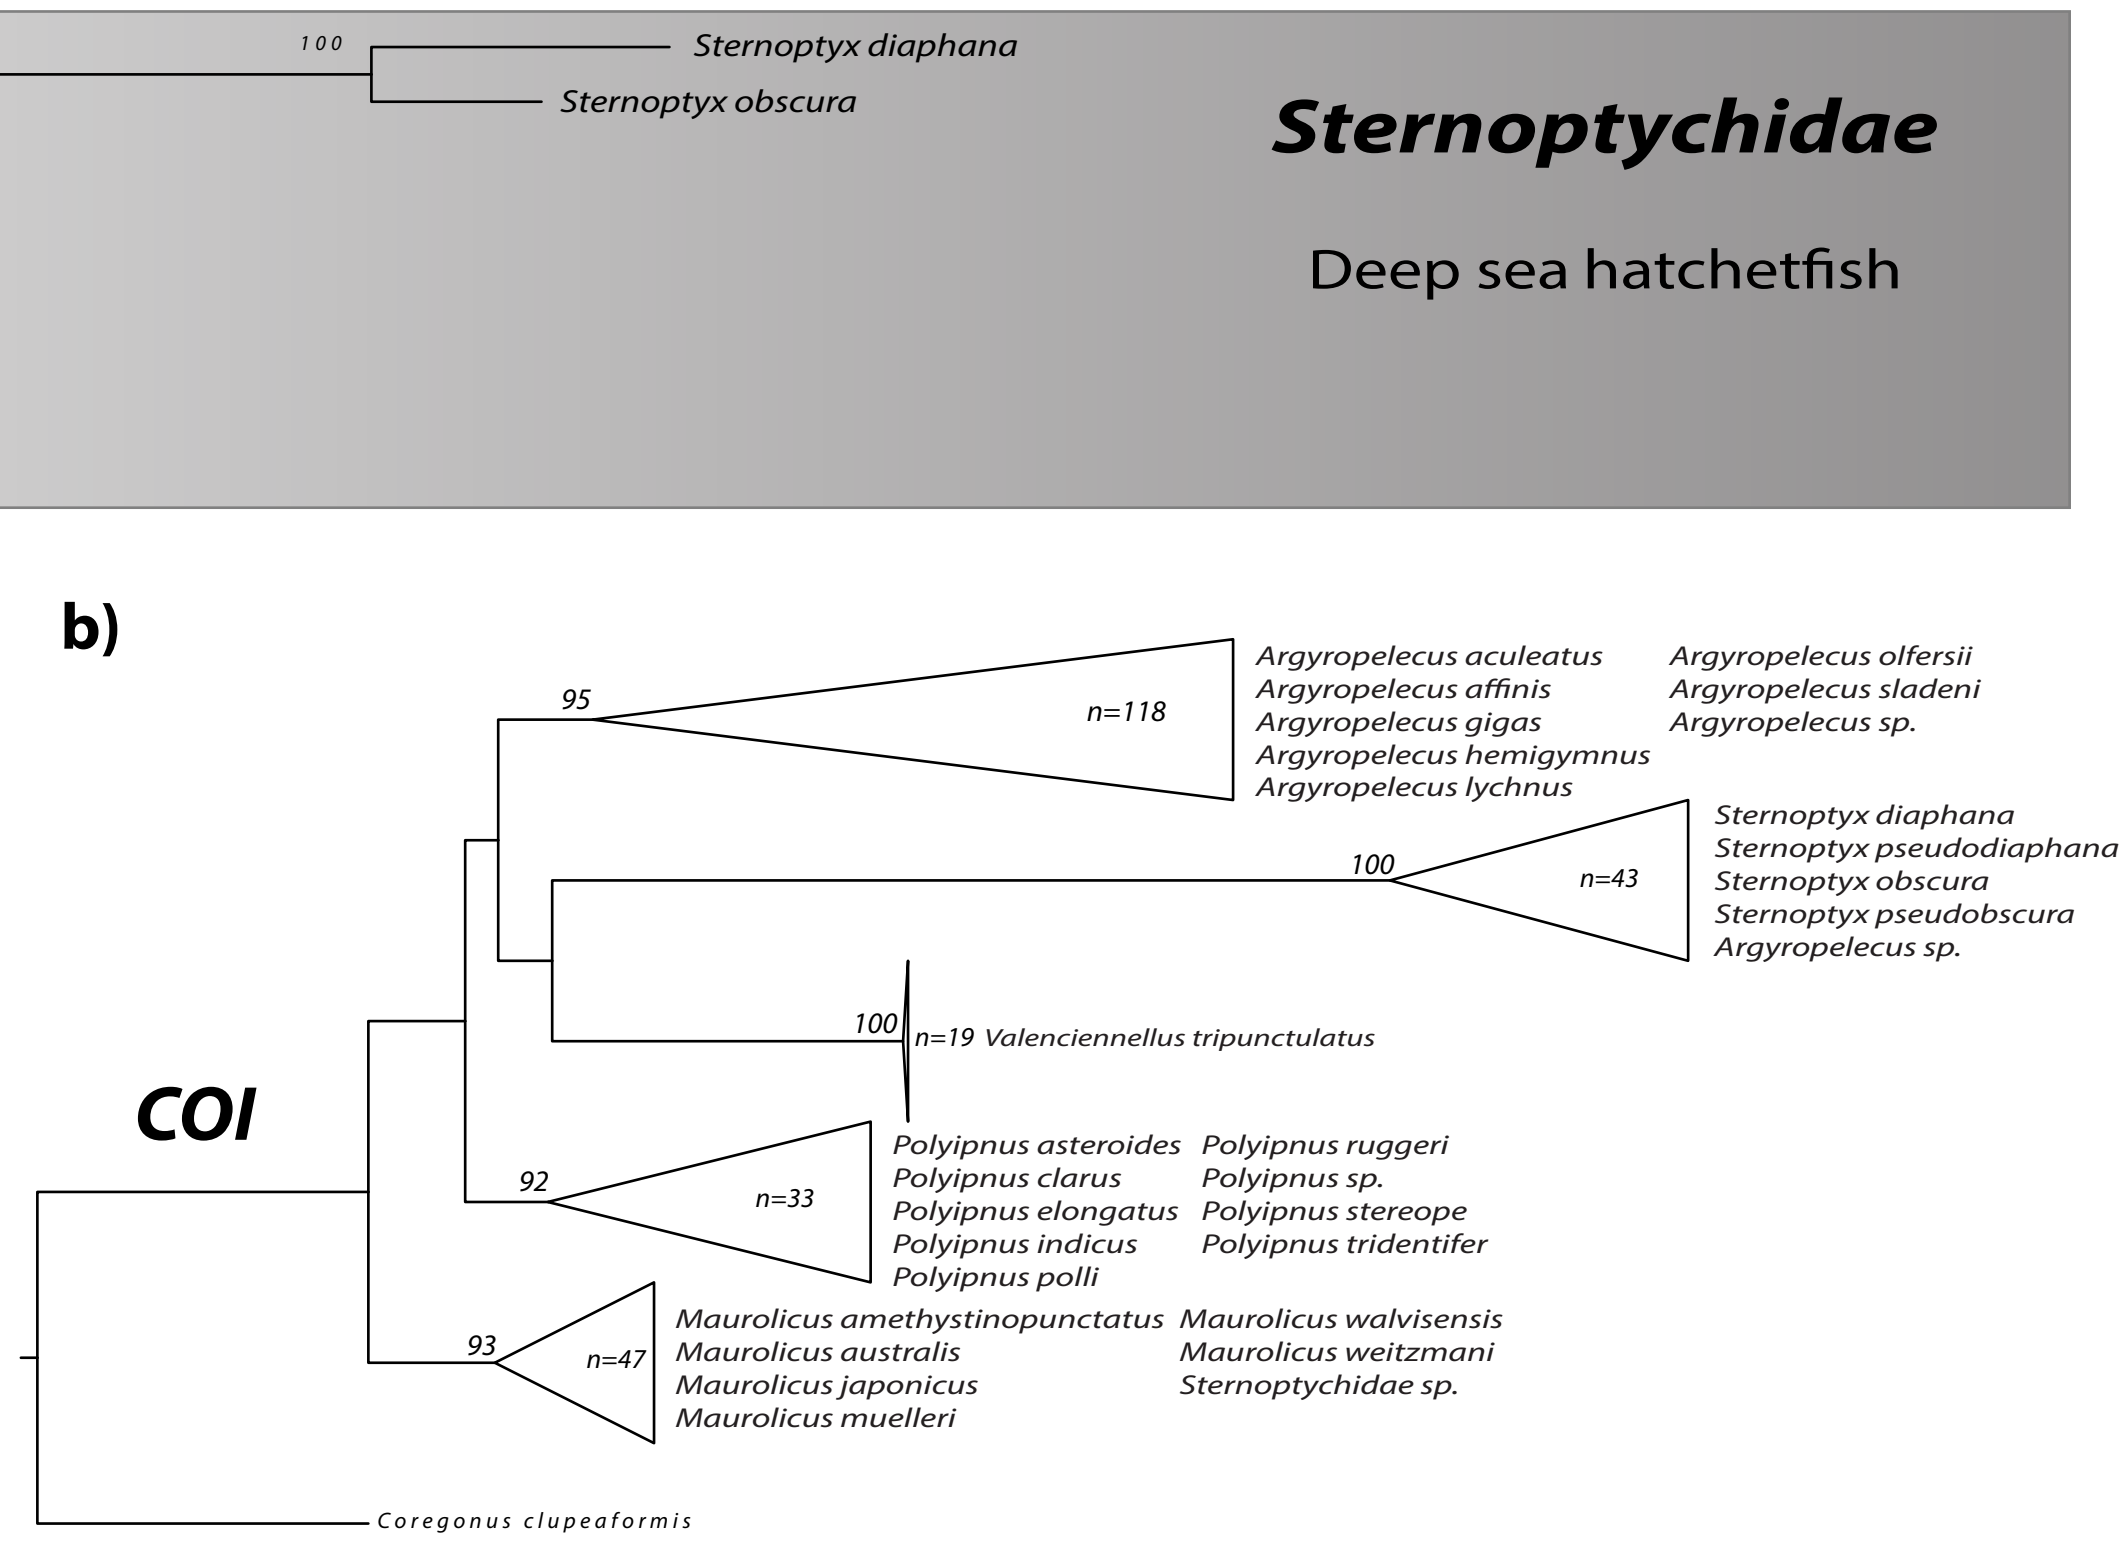

# ***Sternoptychidae***

Deep sea hatchetfish

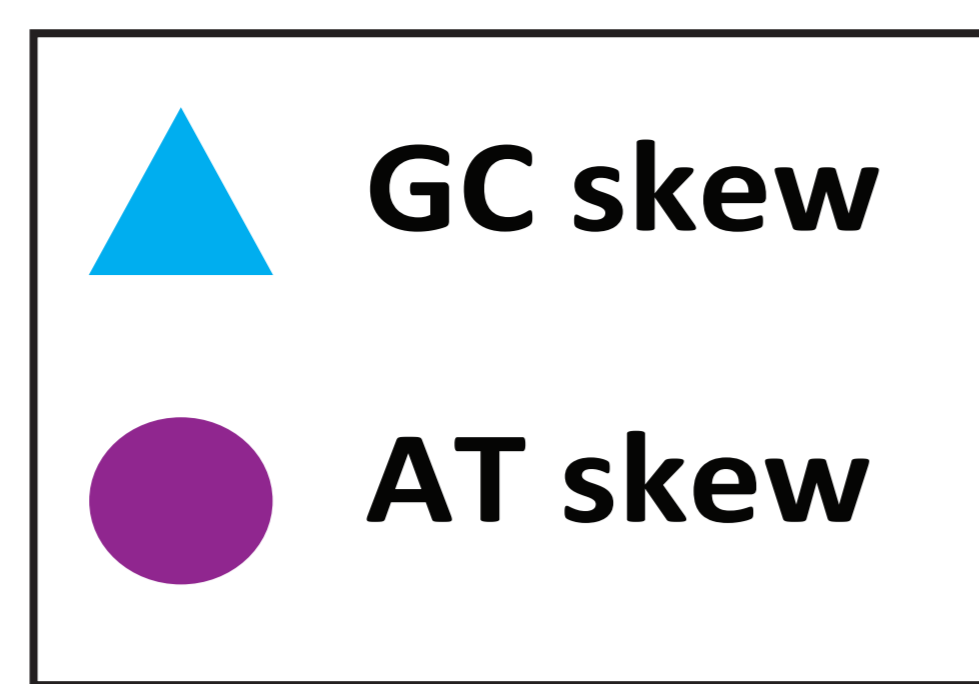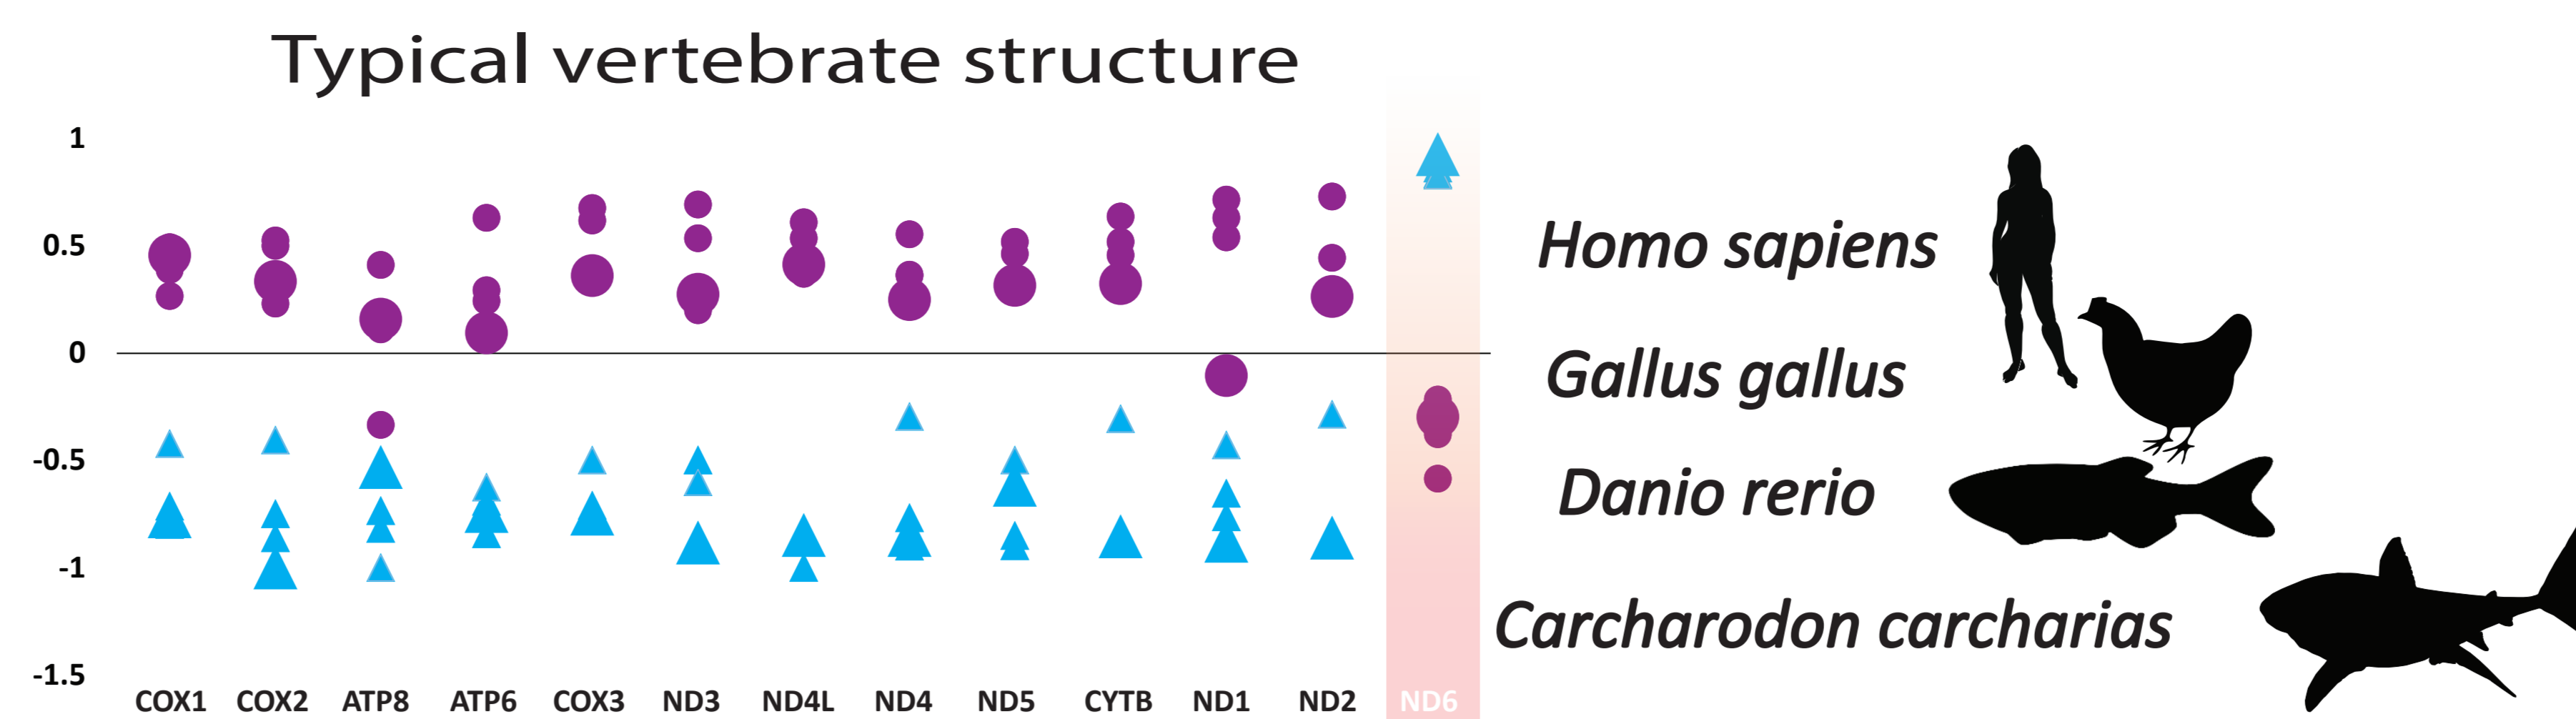

*Argyrolepecus aculeatus*

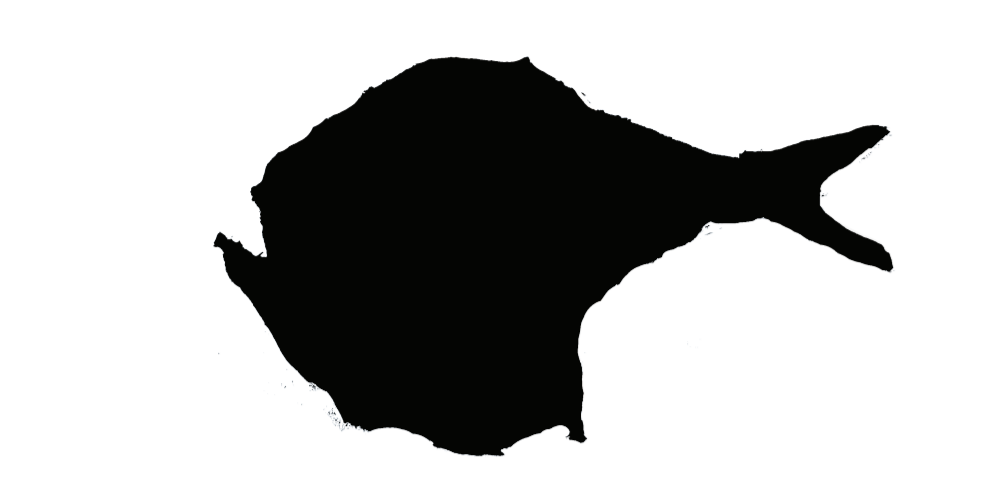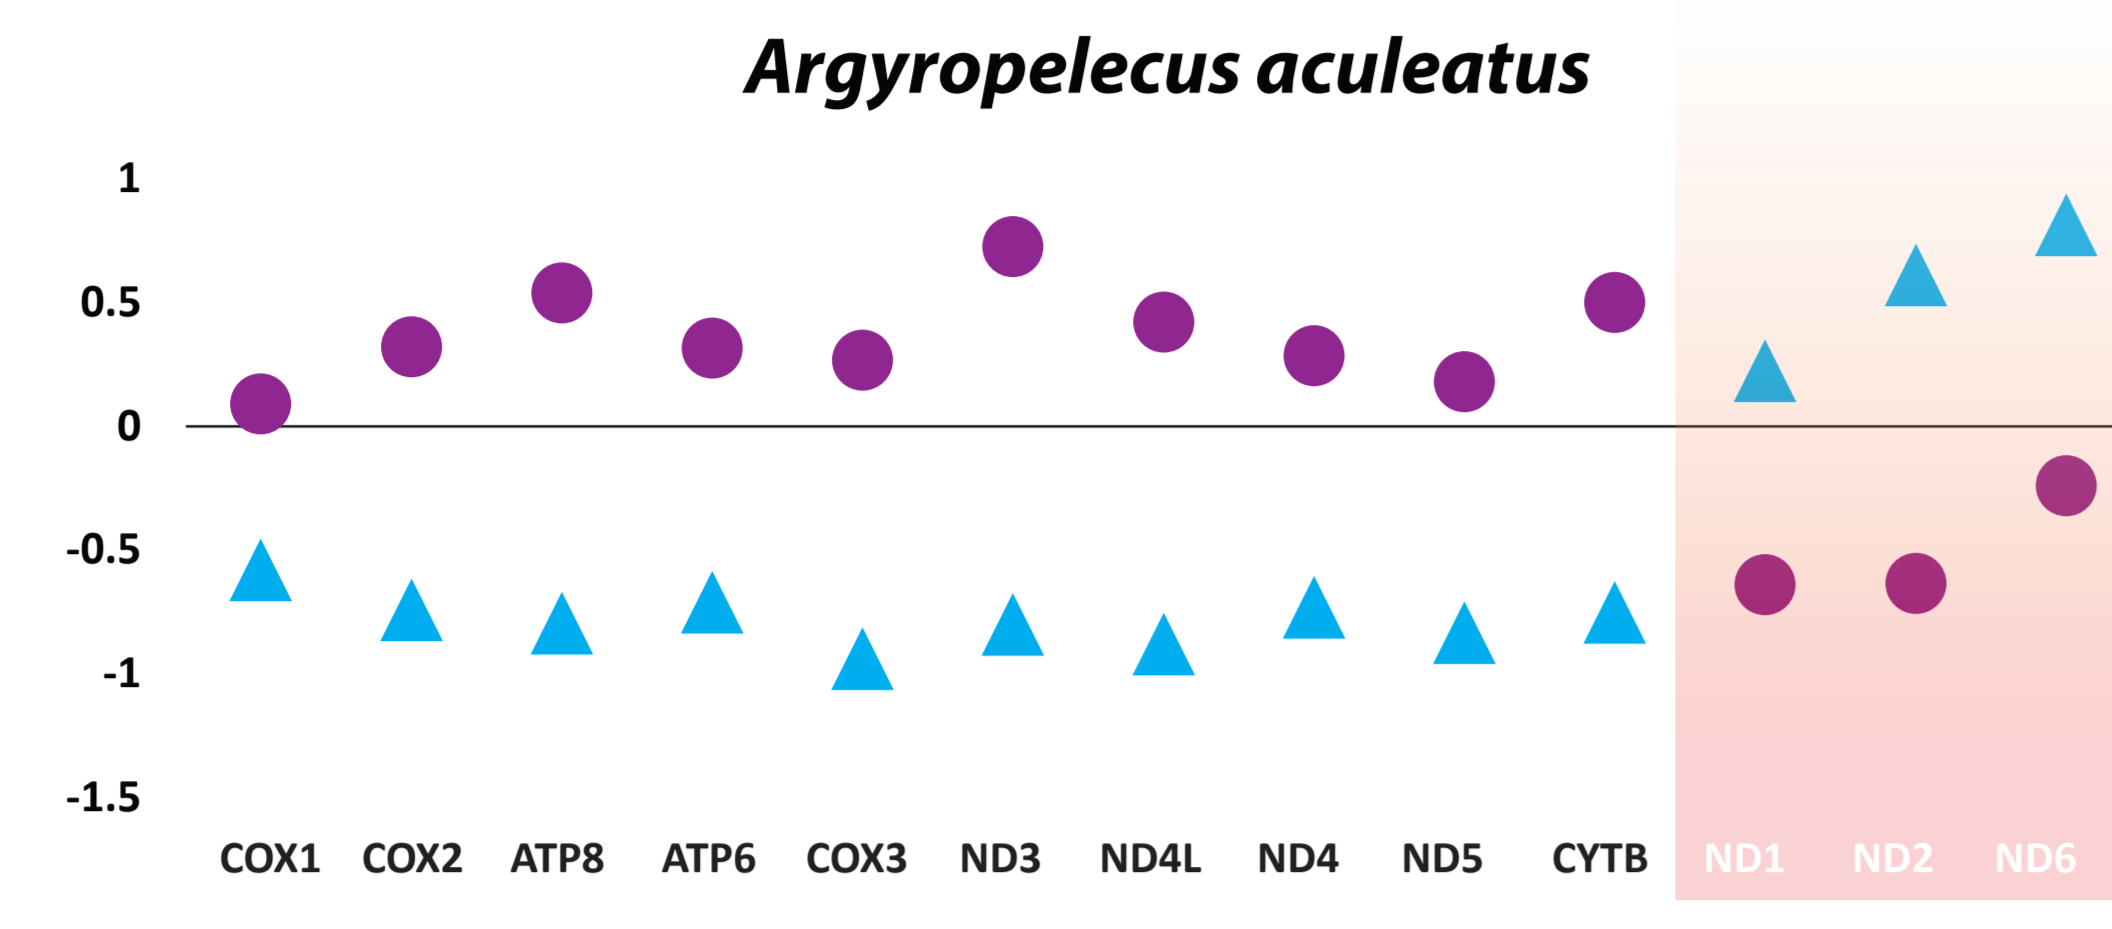

*Argyrolepecus olfersii*

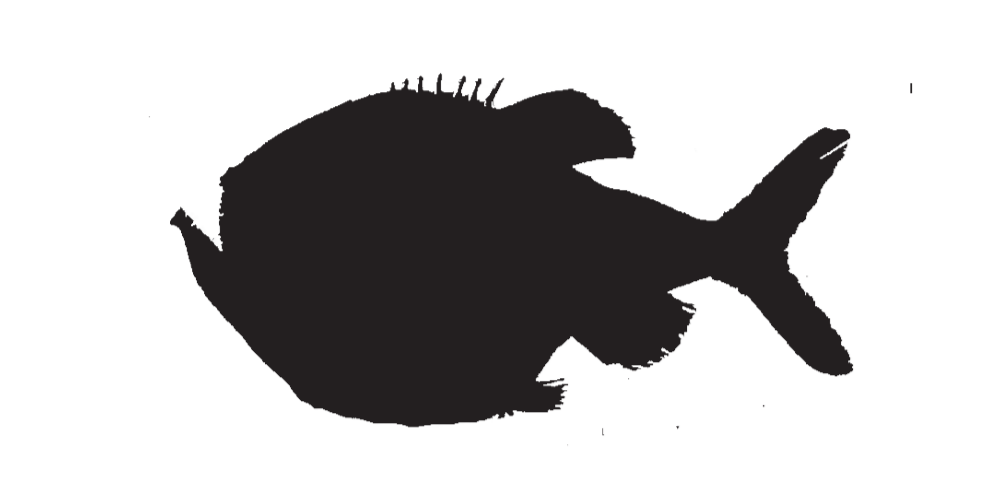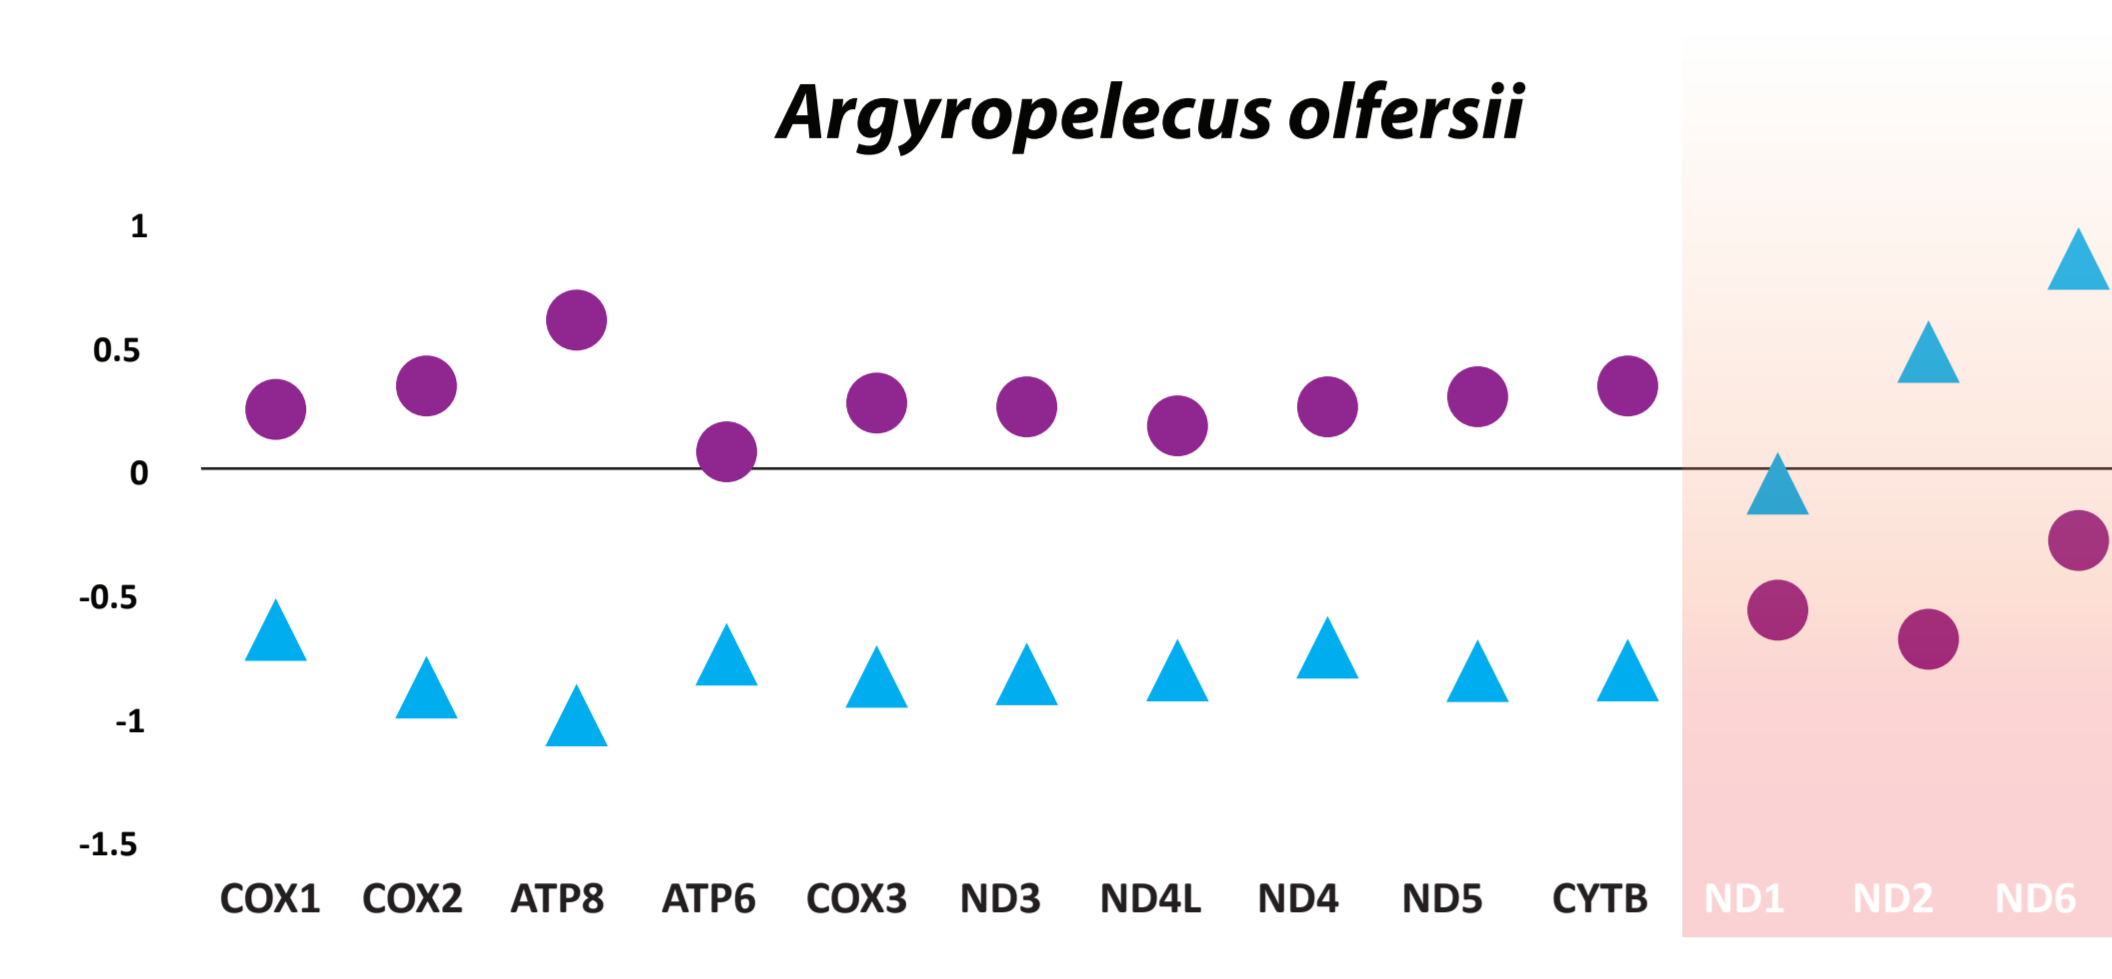

*Argyrolepecus hemigymnus*

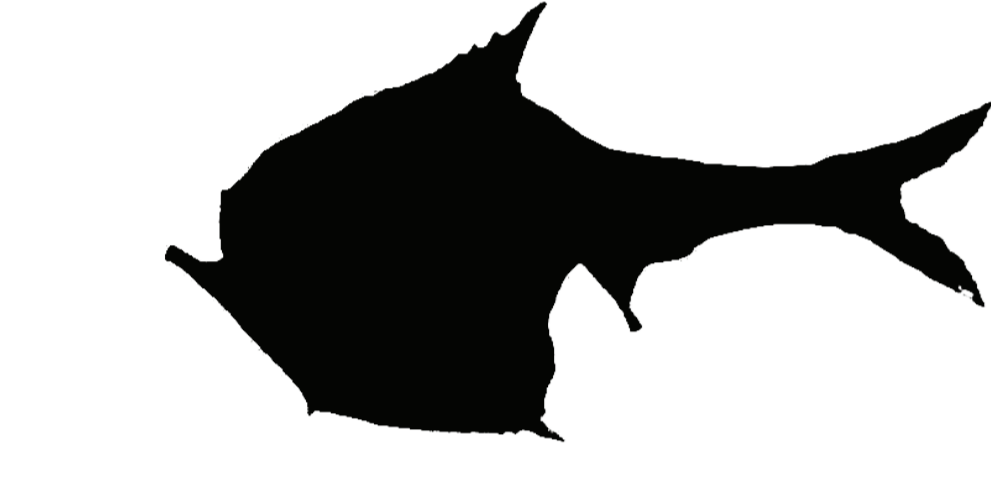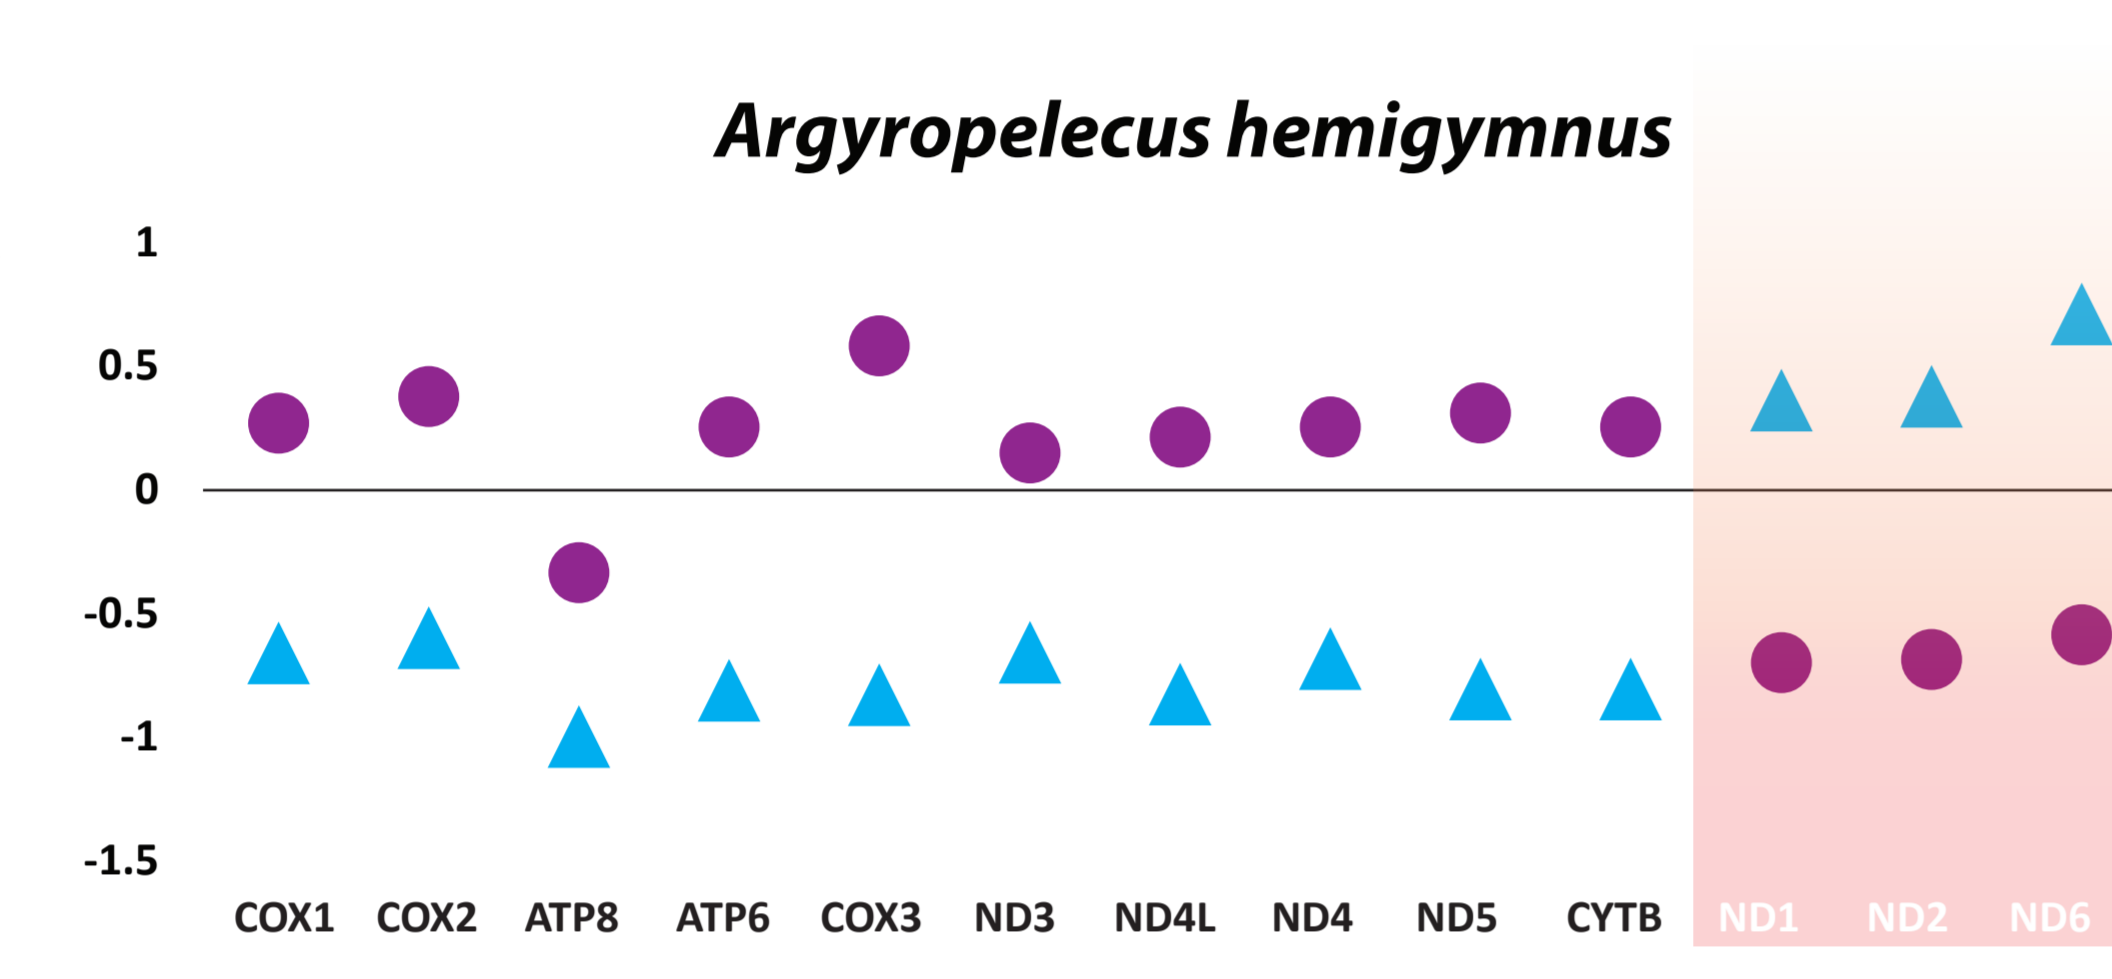

*Sternoptyx diaphana*  
(MT588184.1)

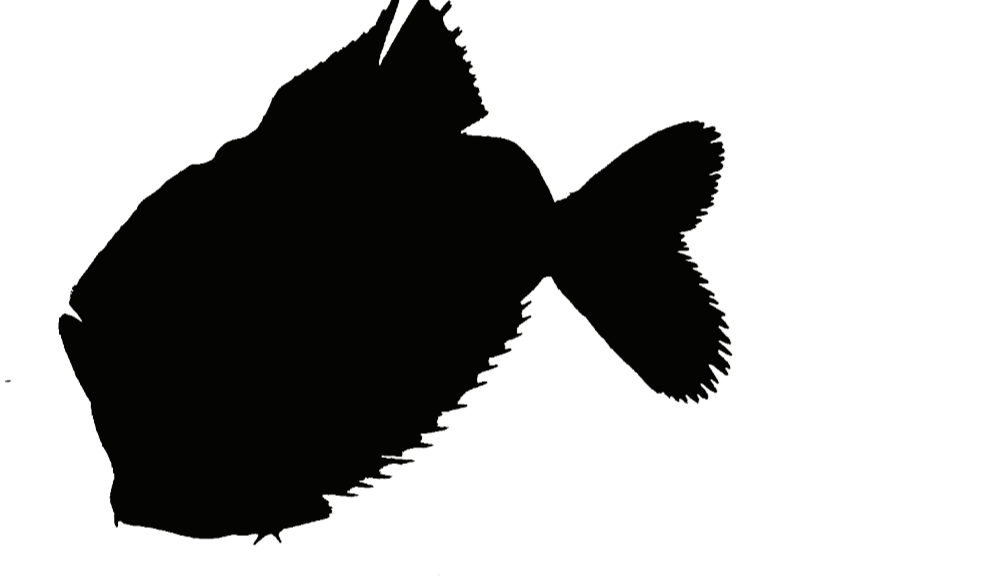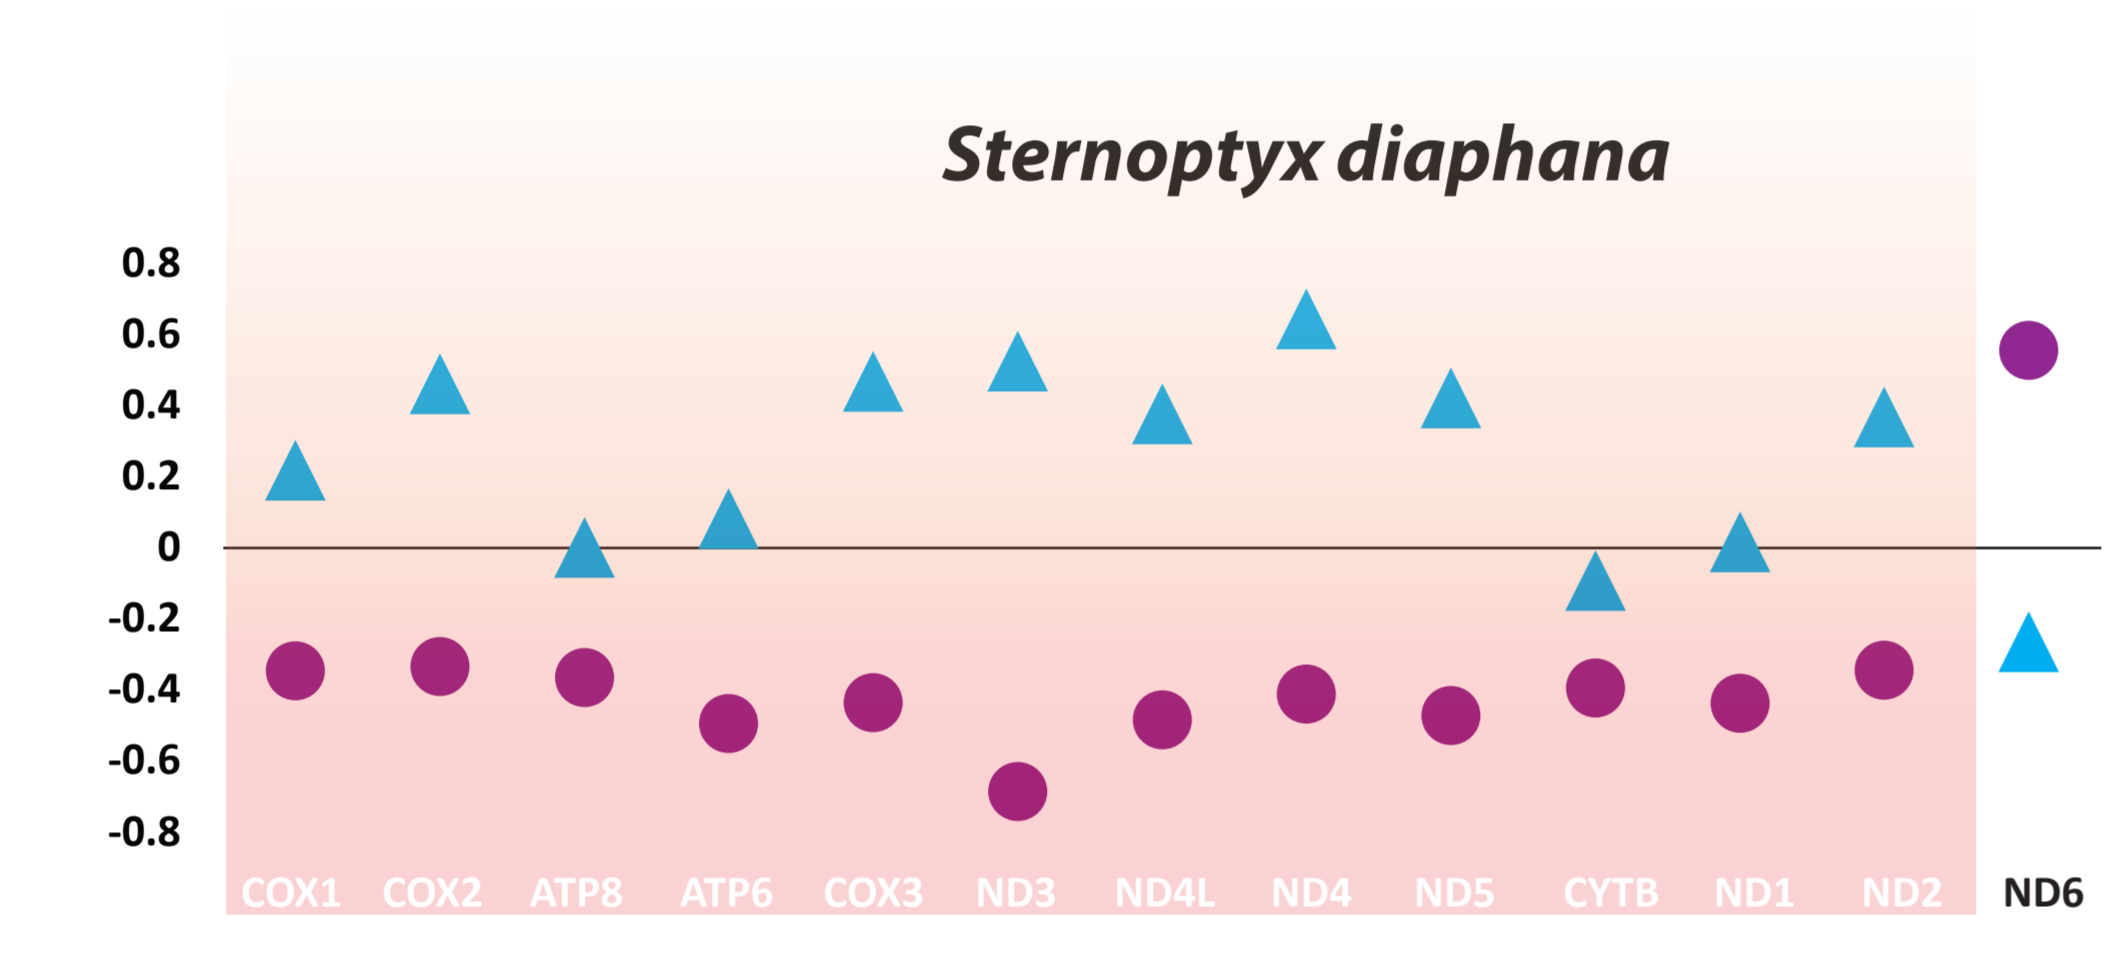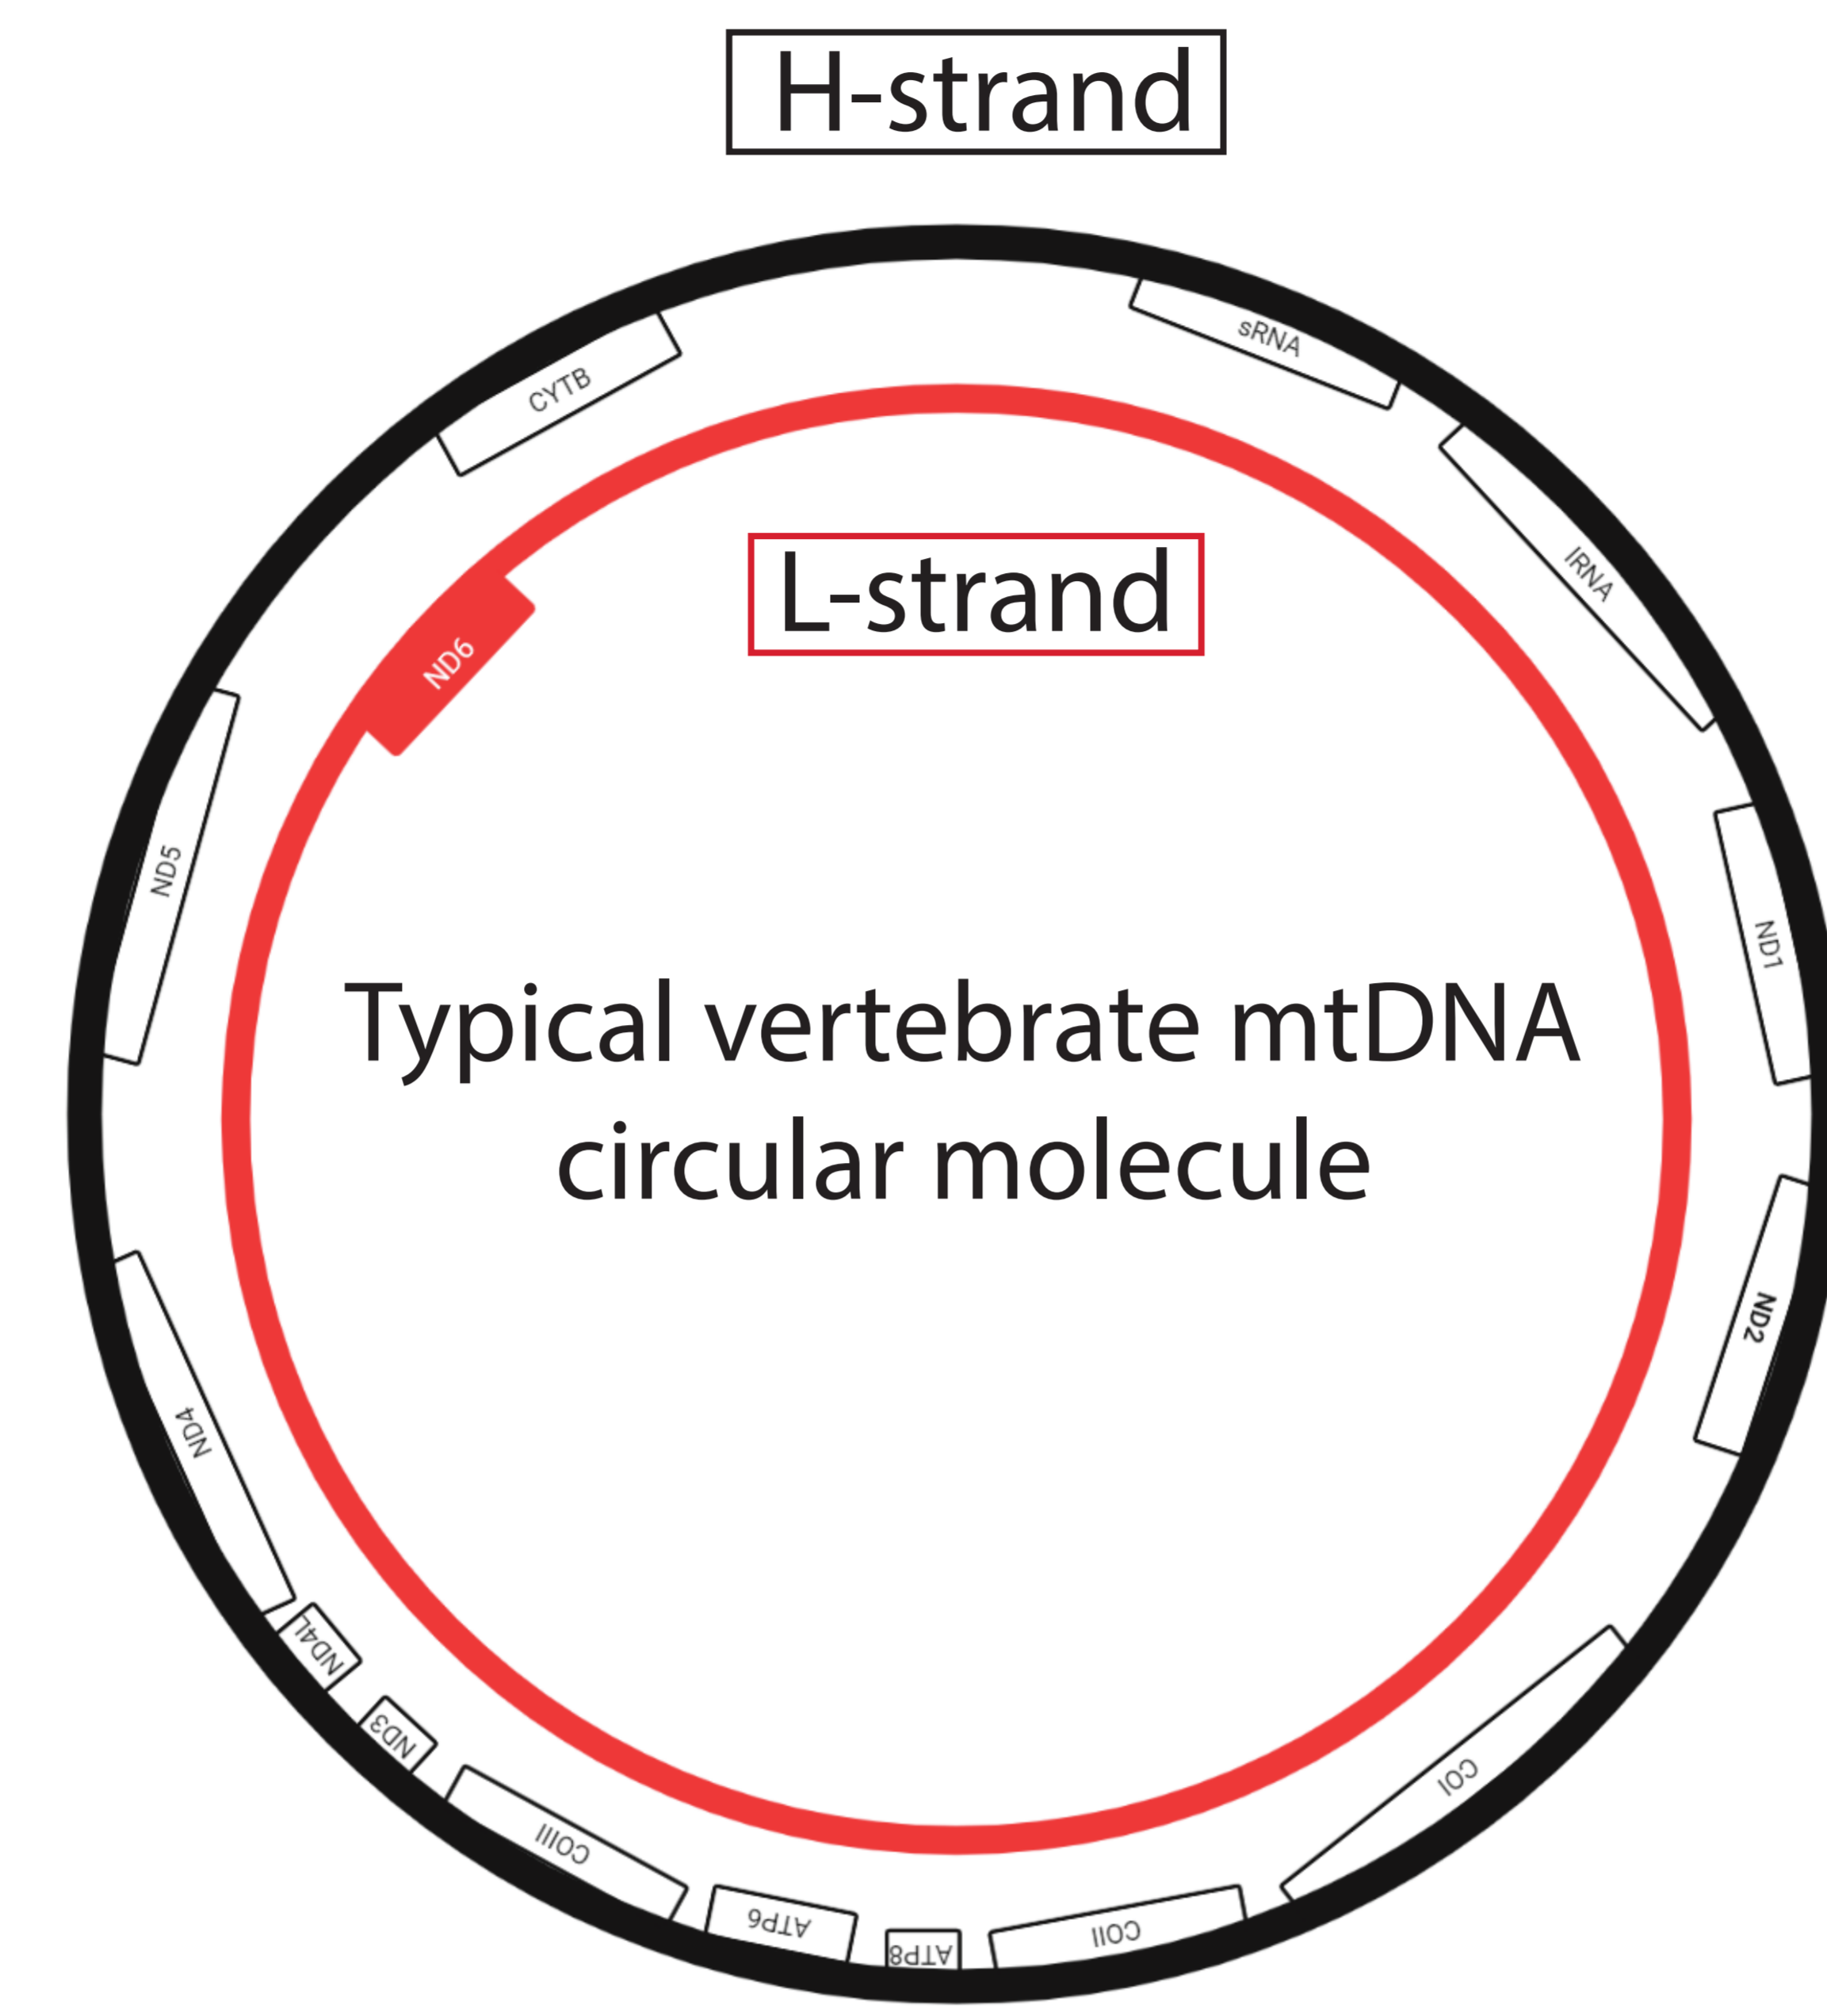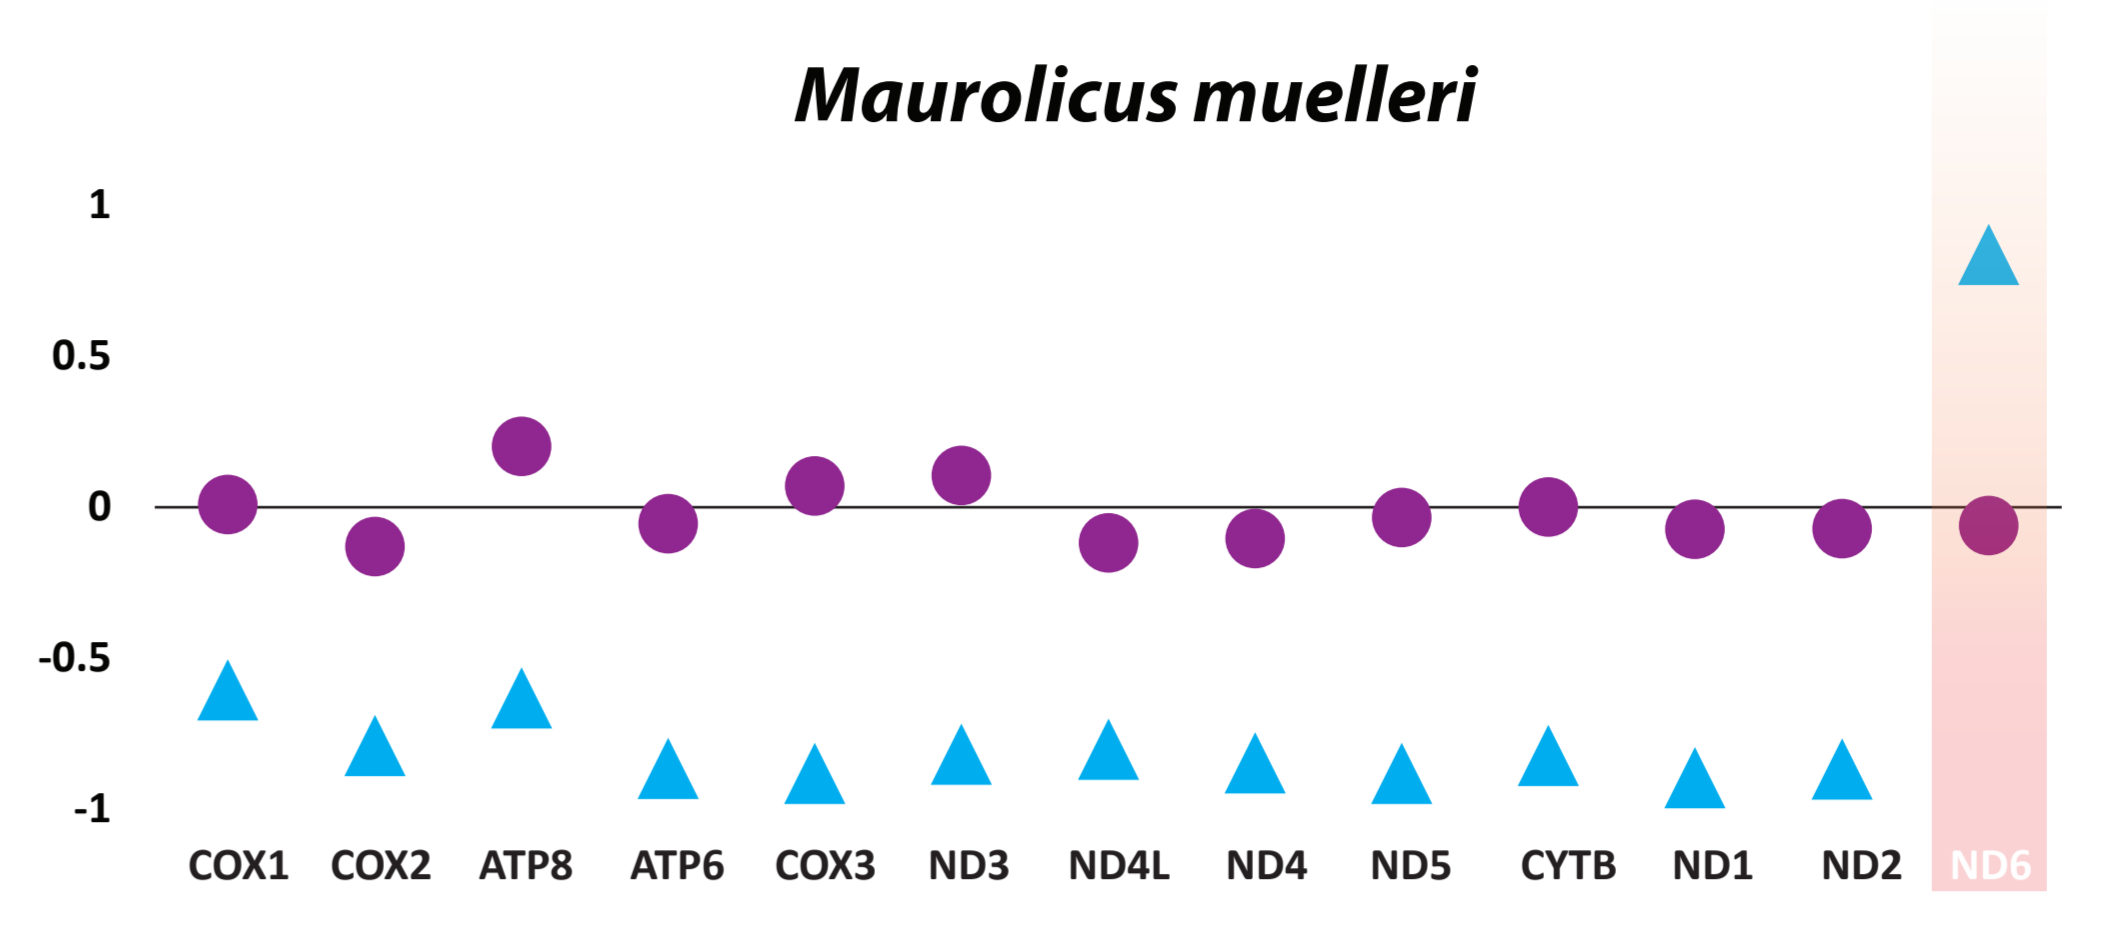

*Maurolicus muelleri*

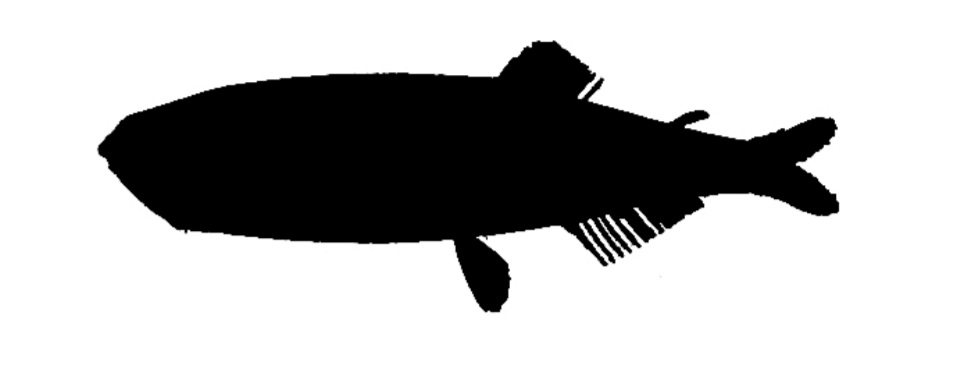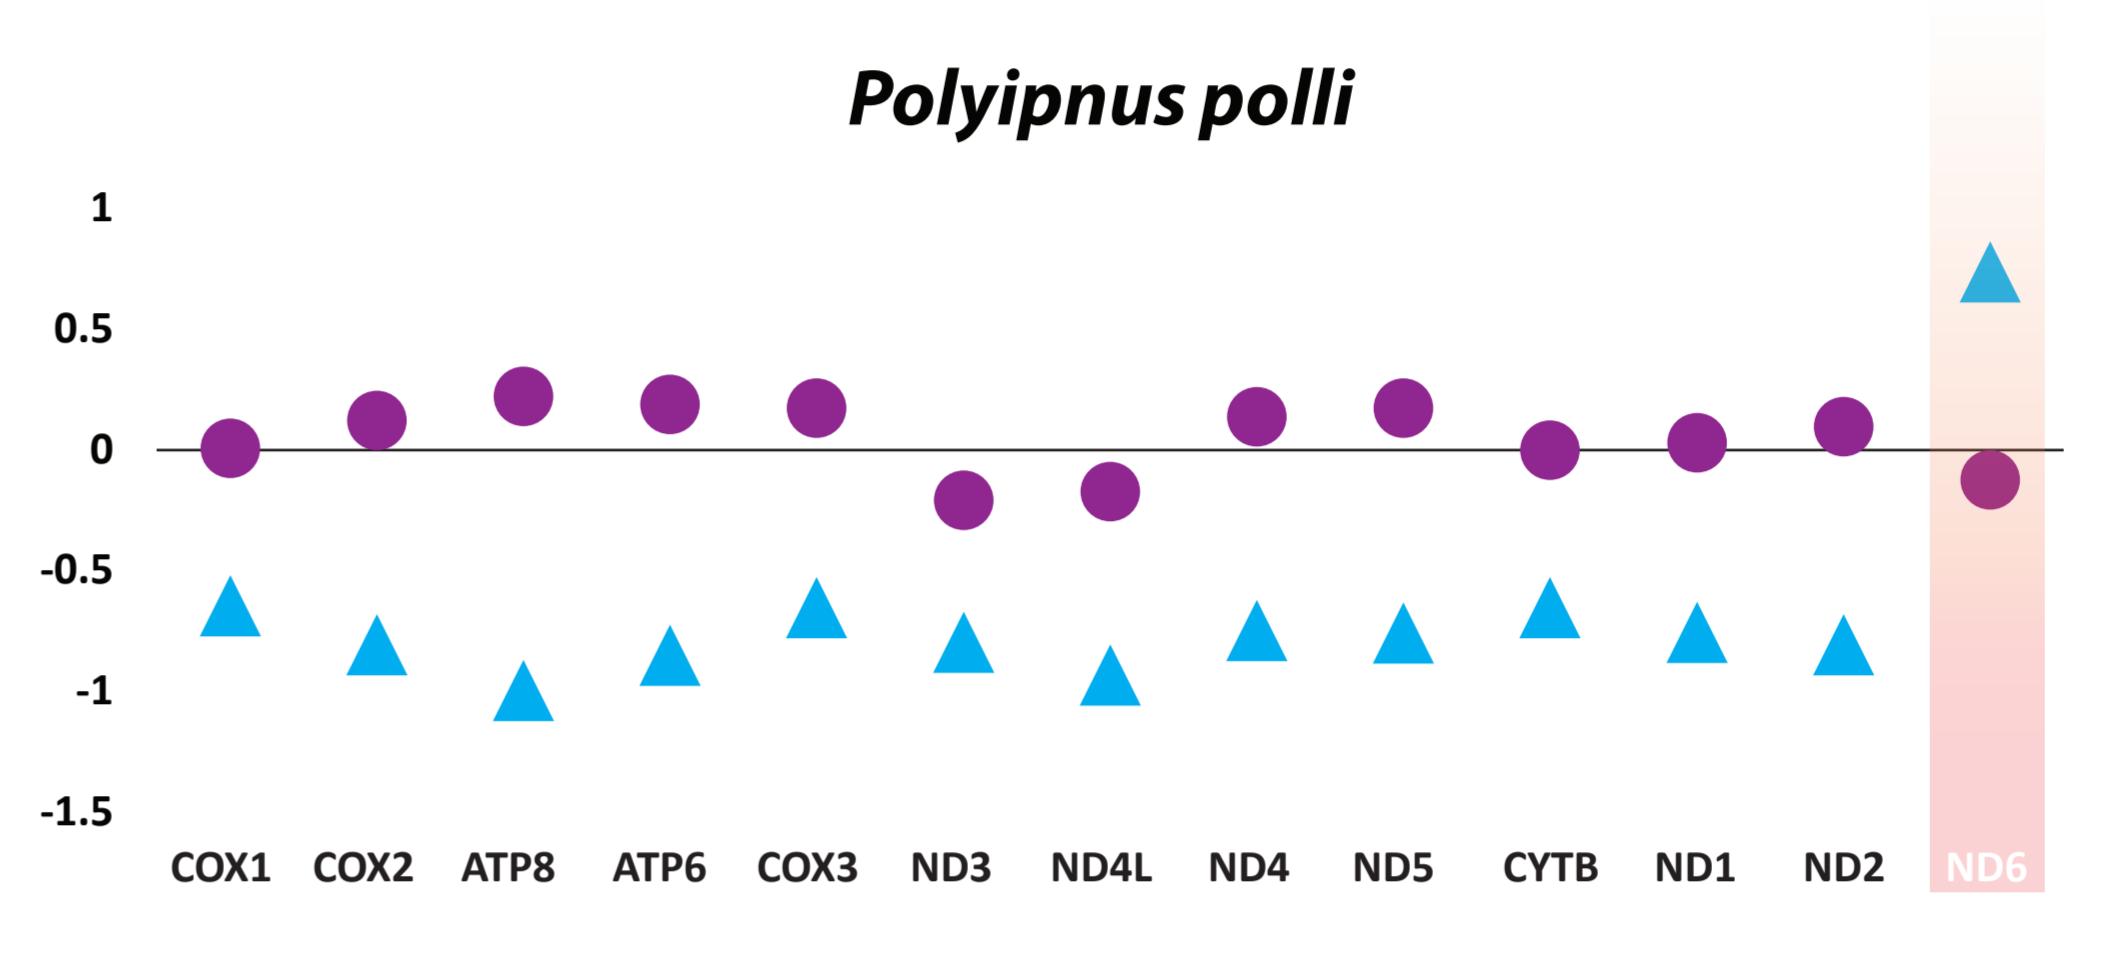

*Polyipnus polli* (AP012962)

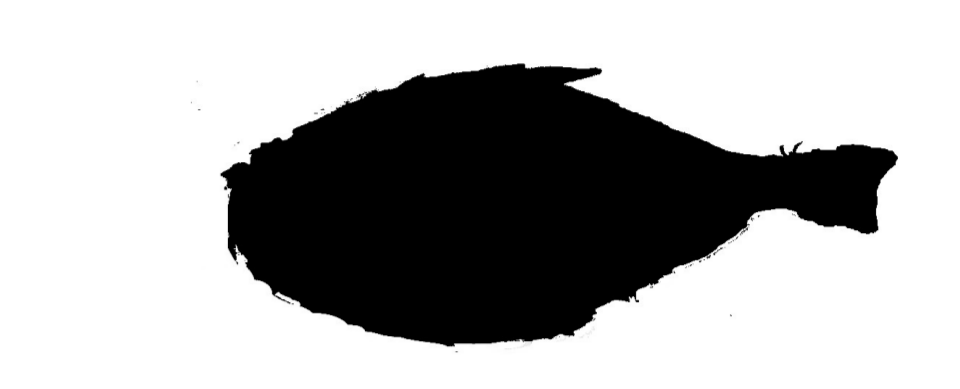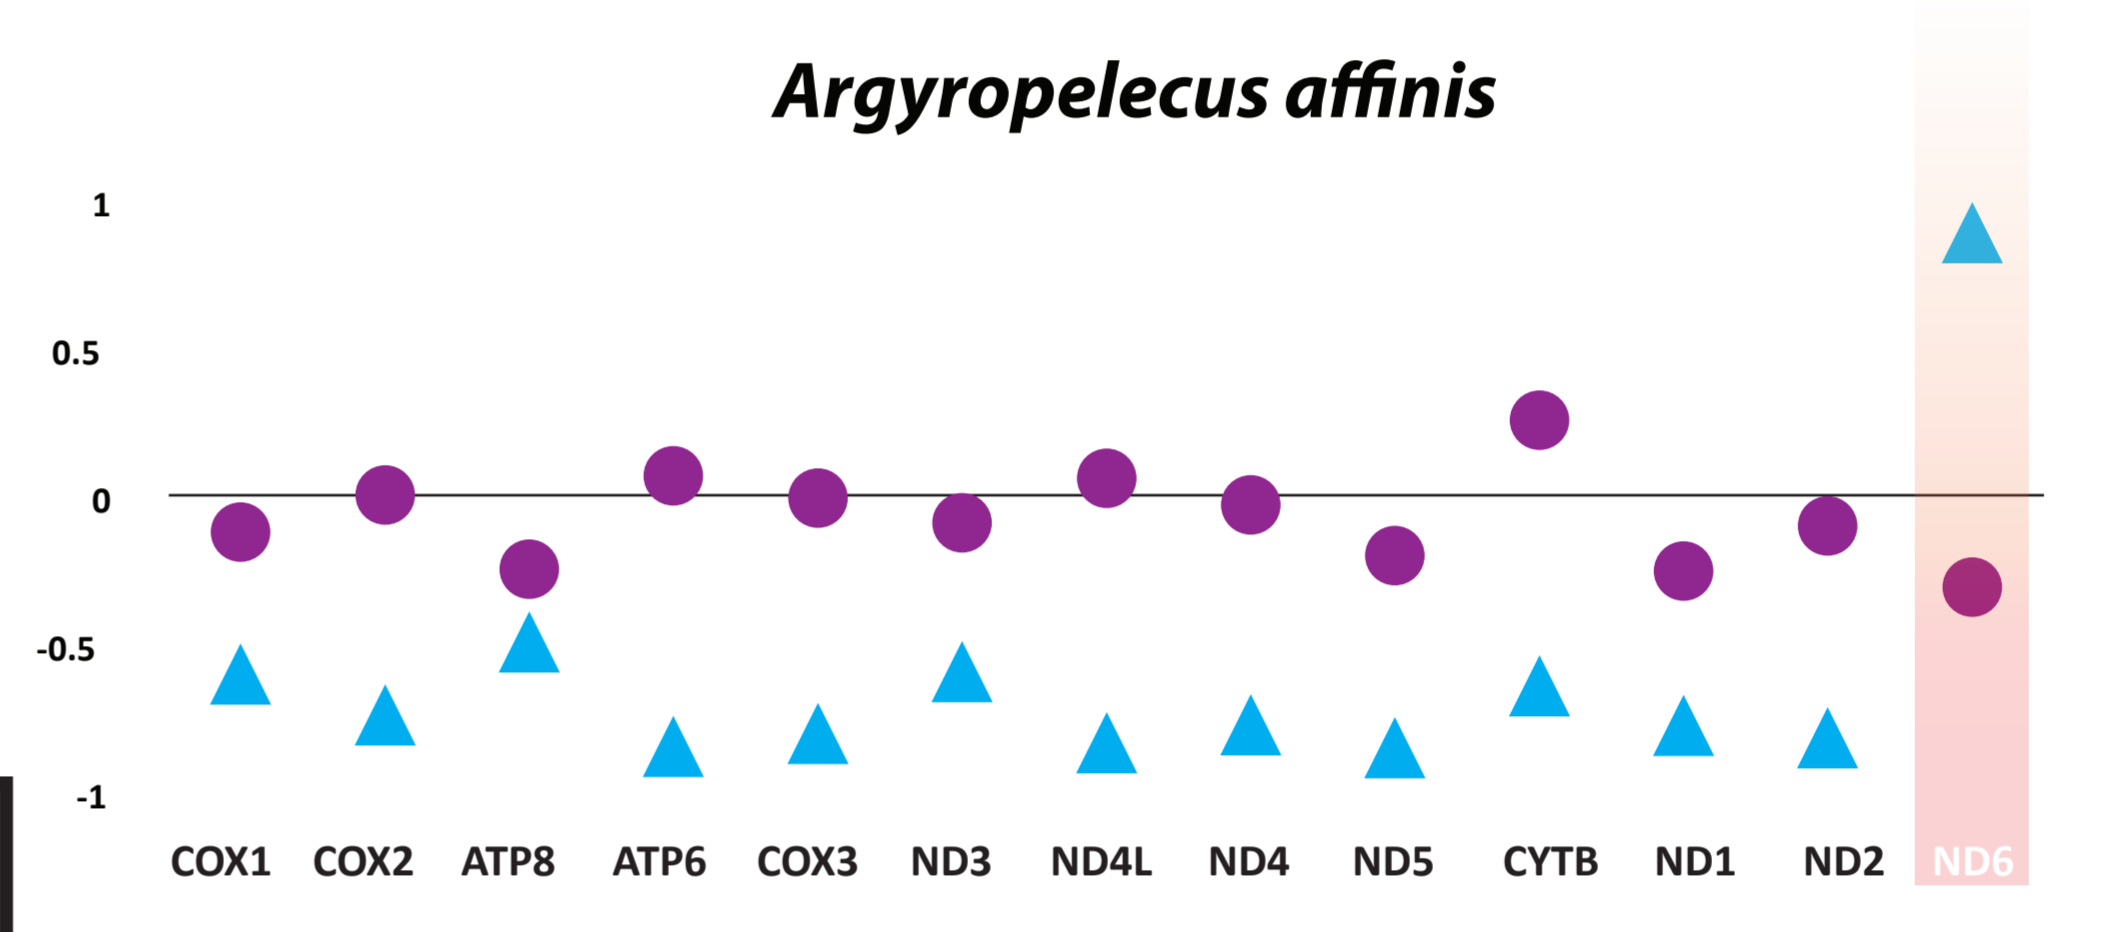

*Argyrolepecus affinis* (AP012964.1)

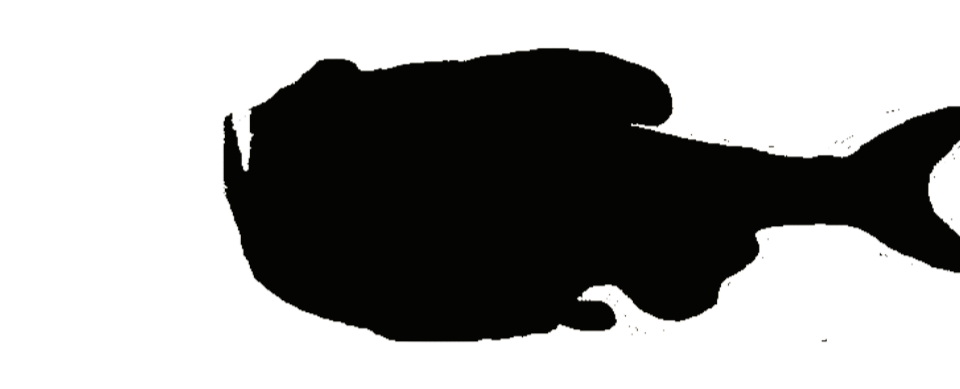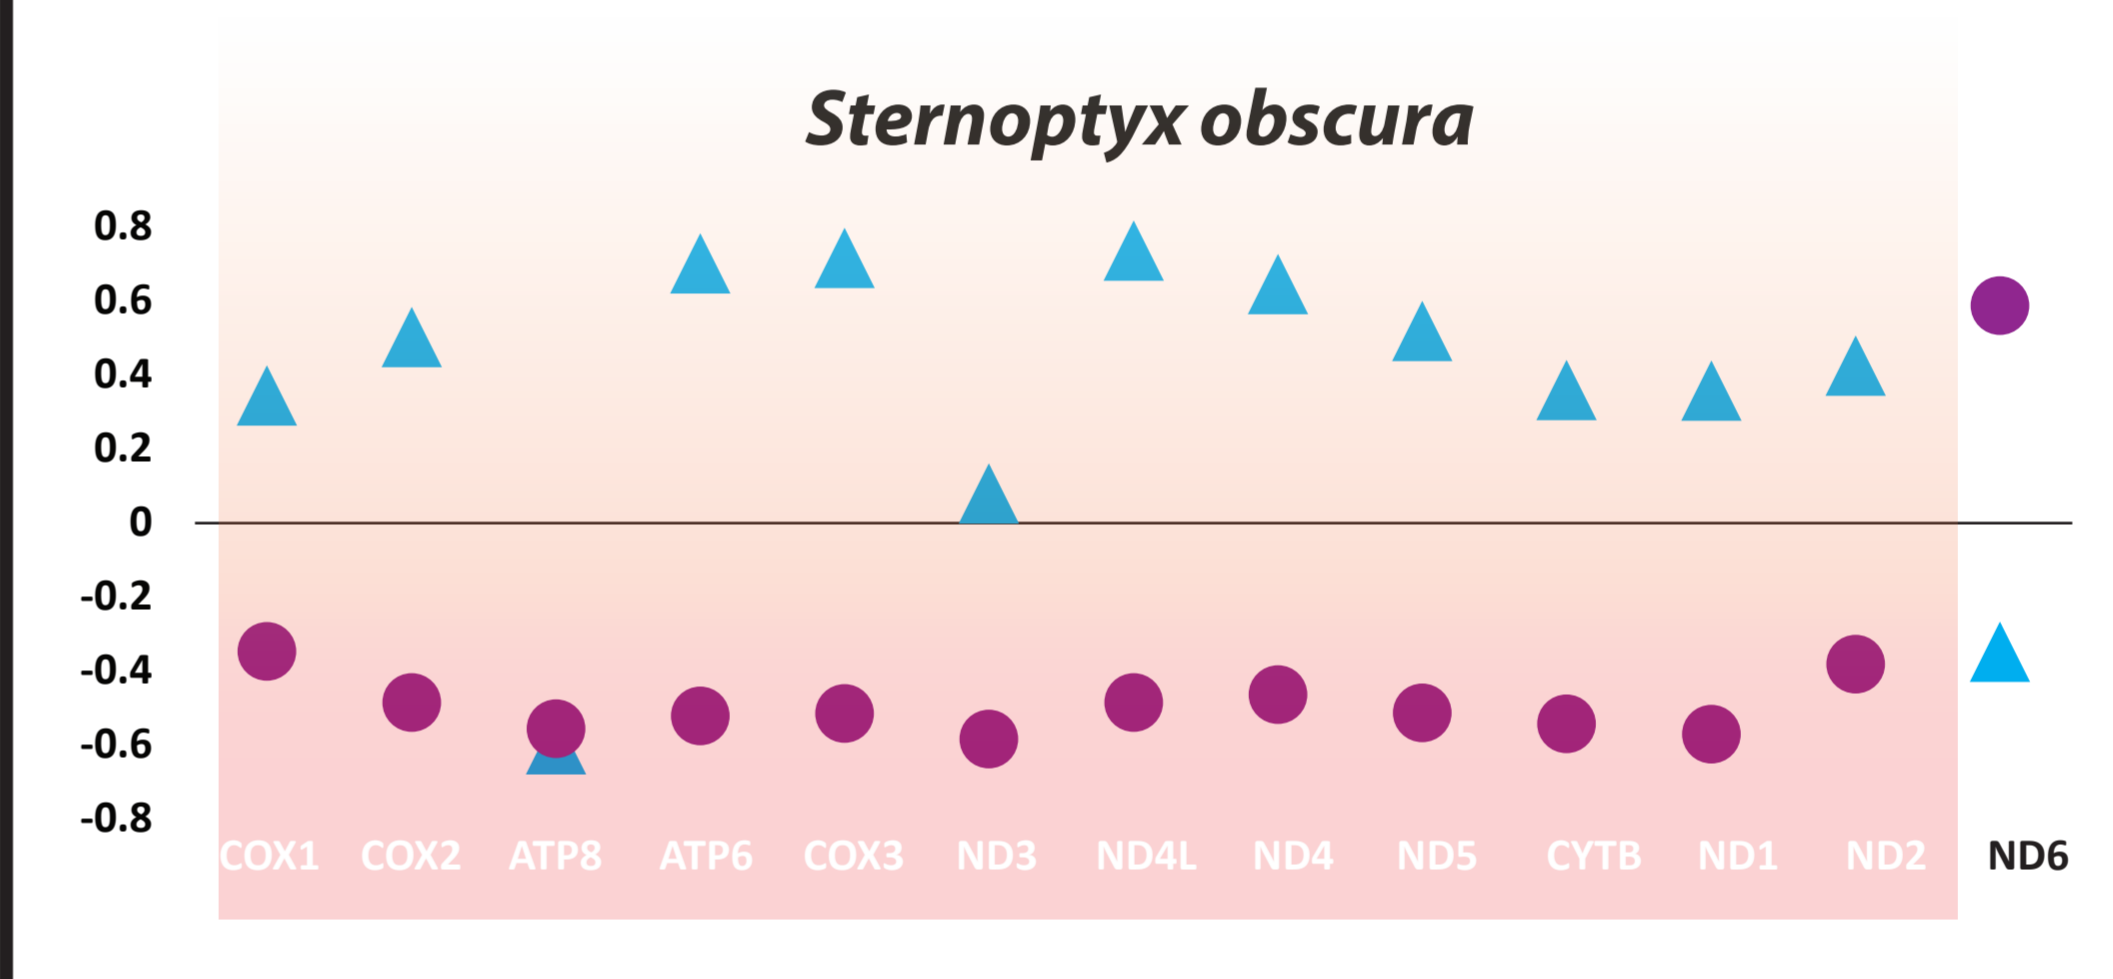

*Sternoptyx obscura*  
(OP057081.1)

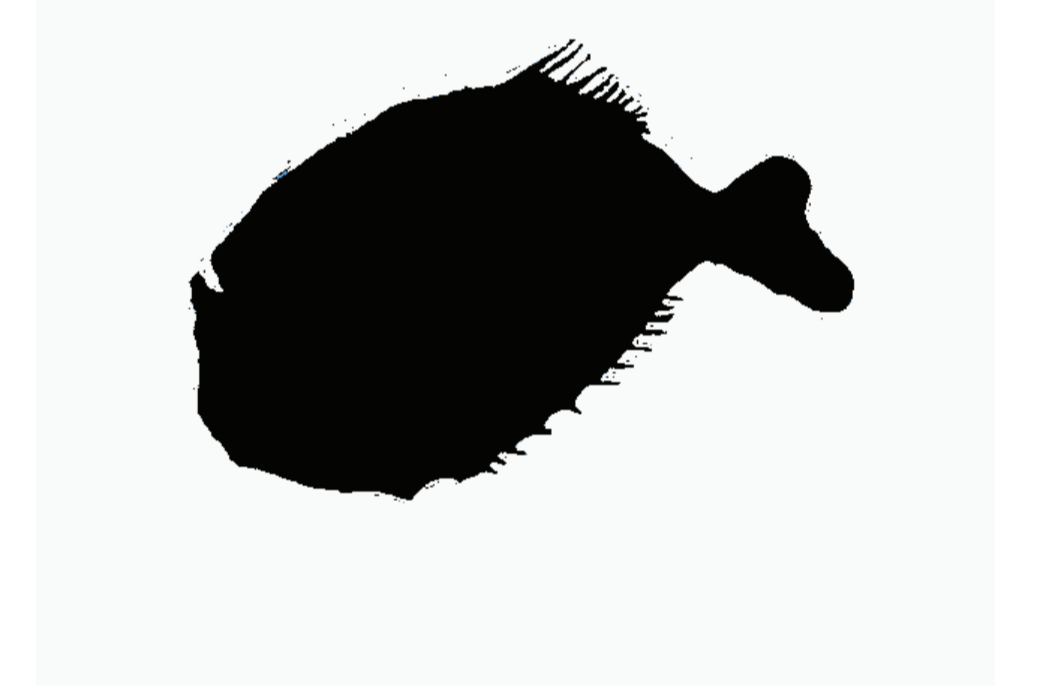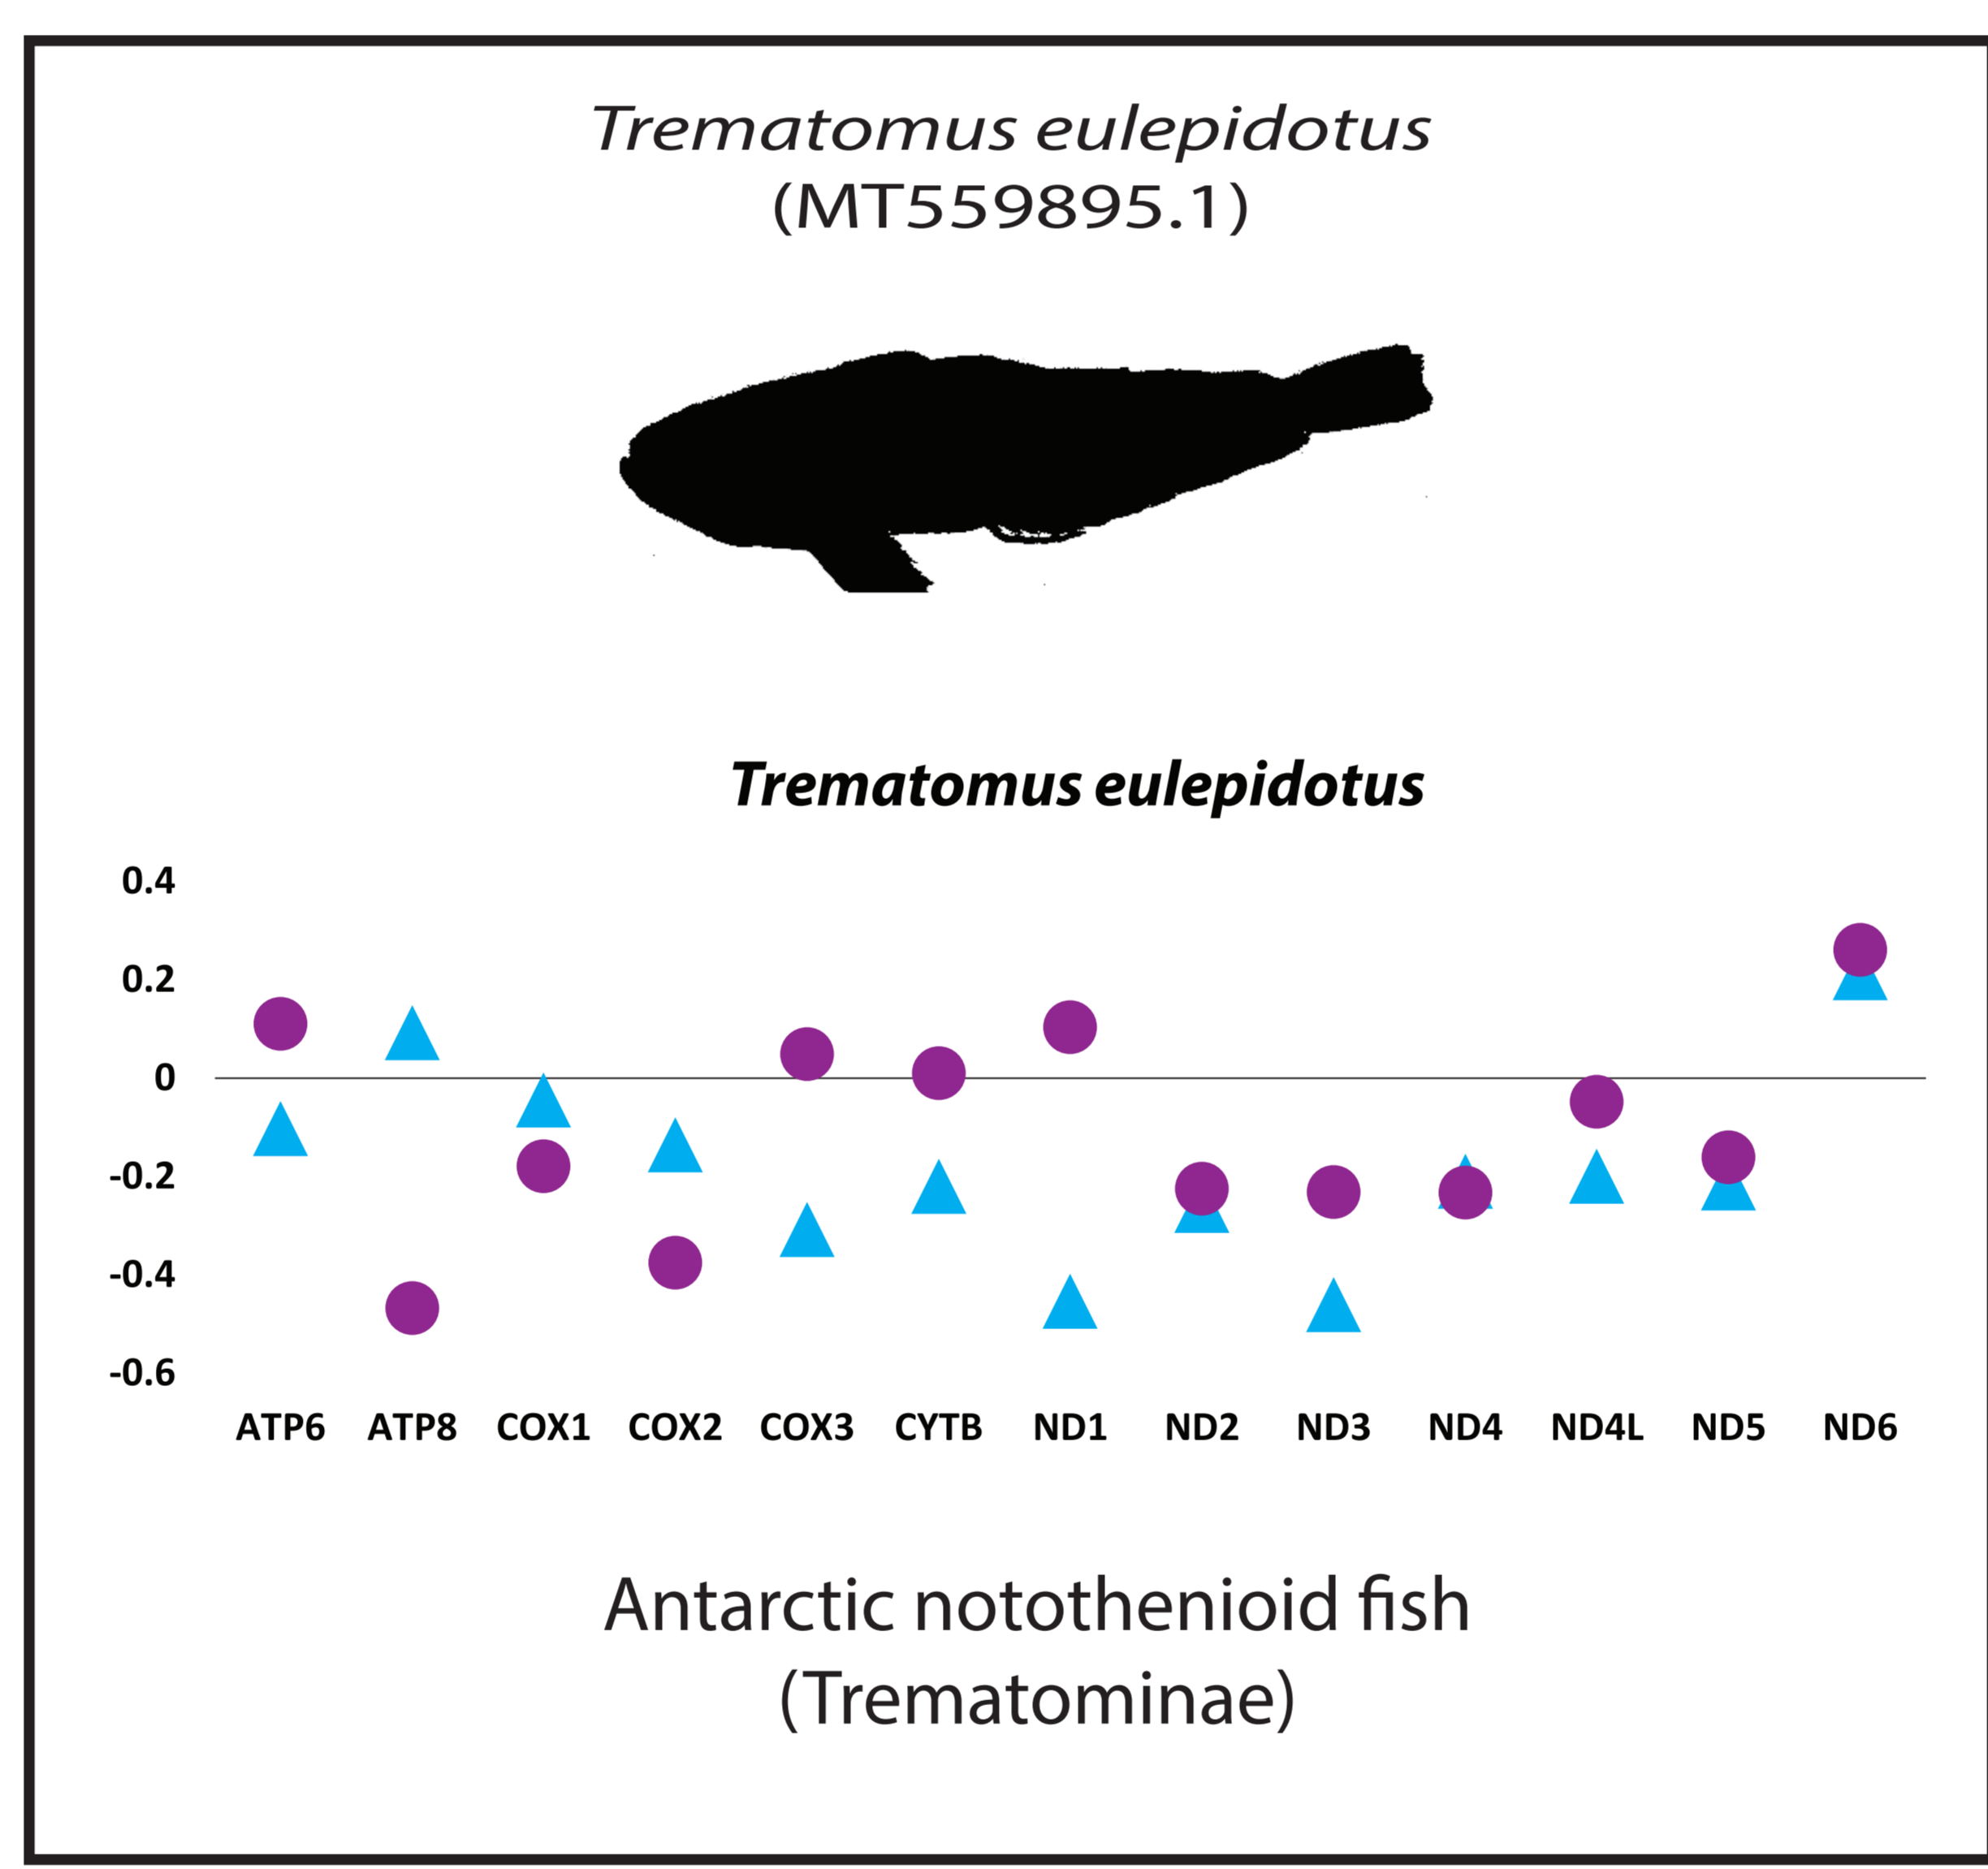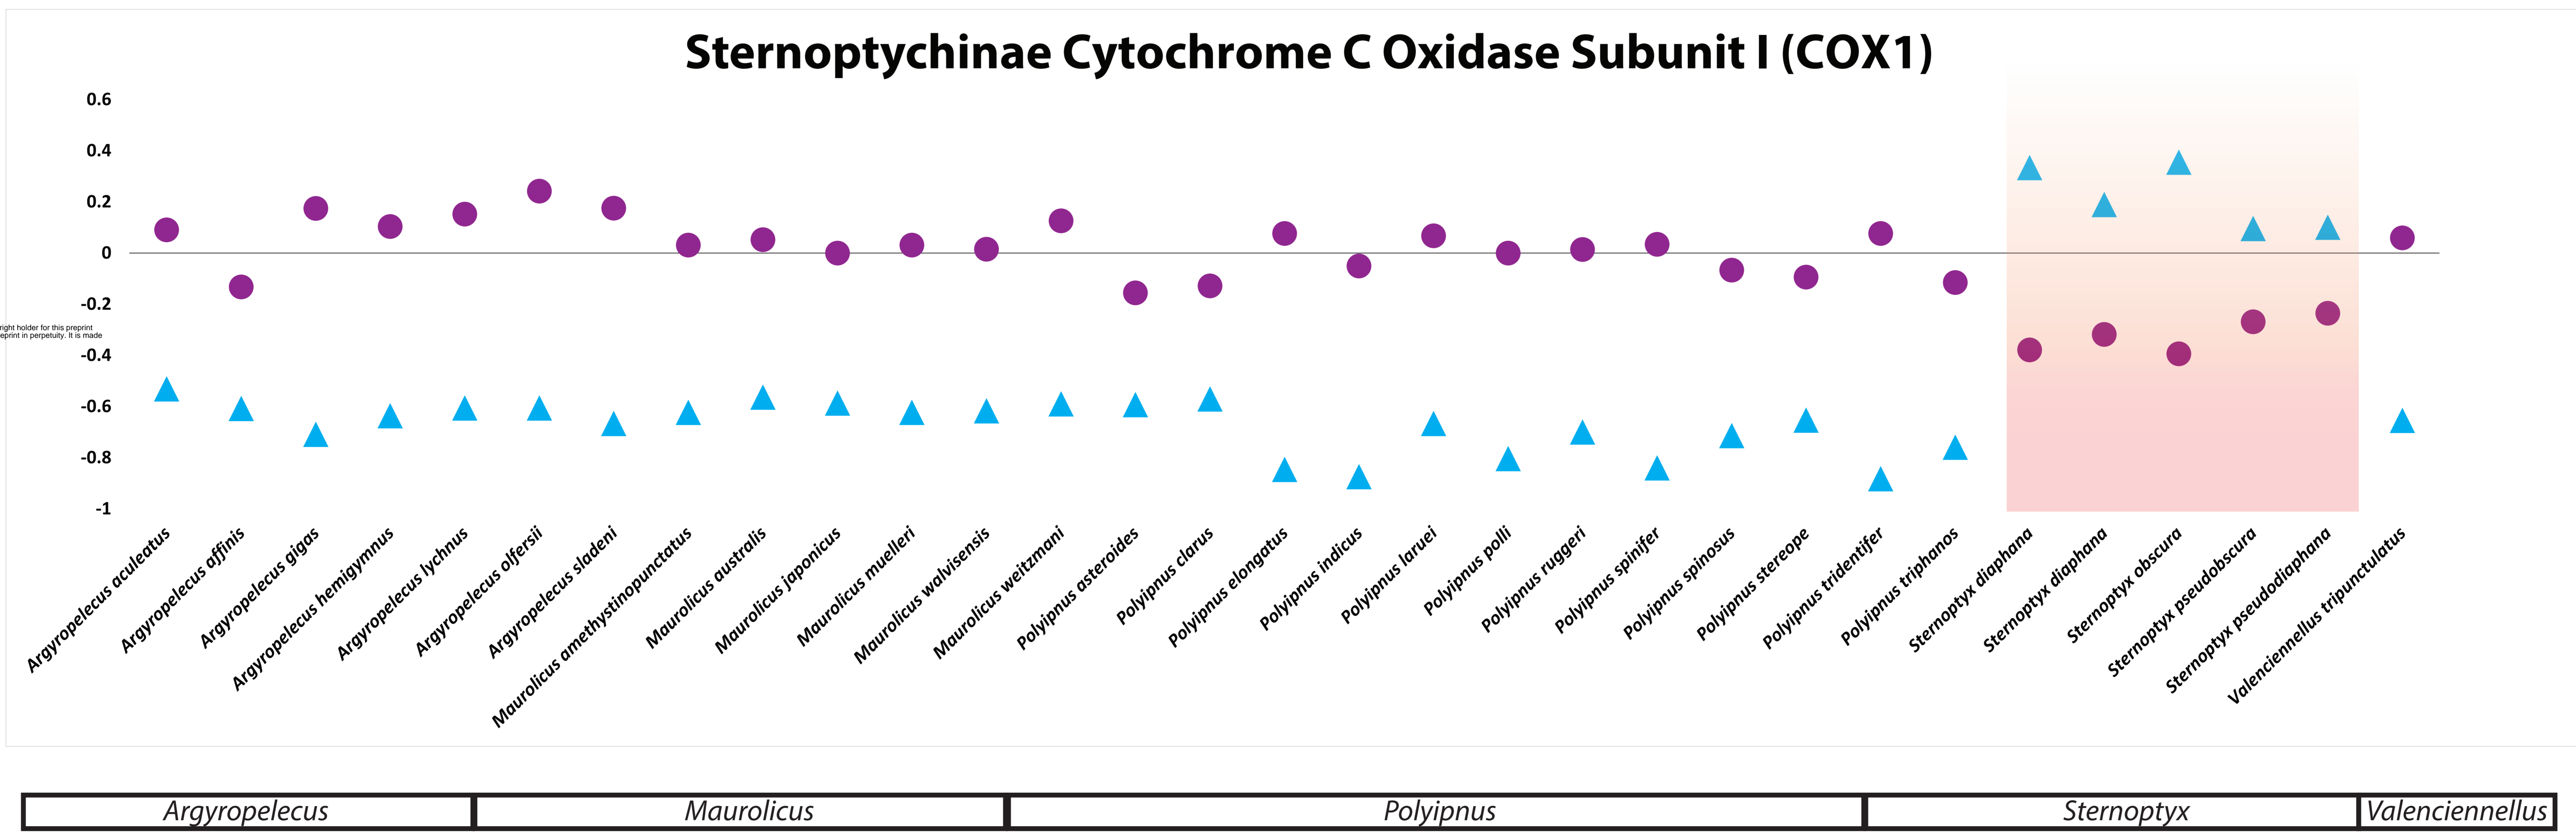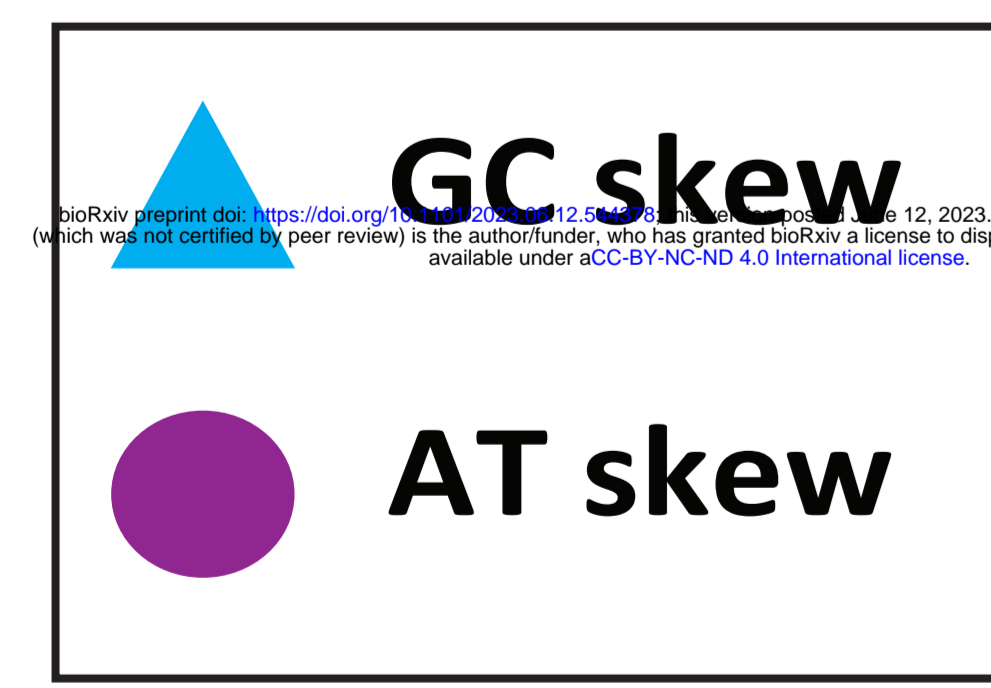

*Argyrolepecus* | *Maurolicus* | *Polyipnus* | *Sternoptyx* | *Valenciennellus*

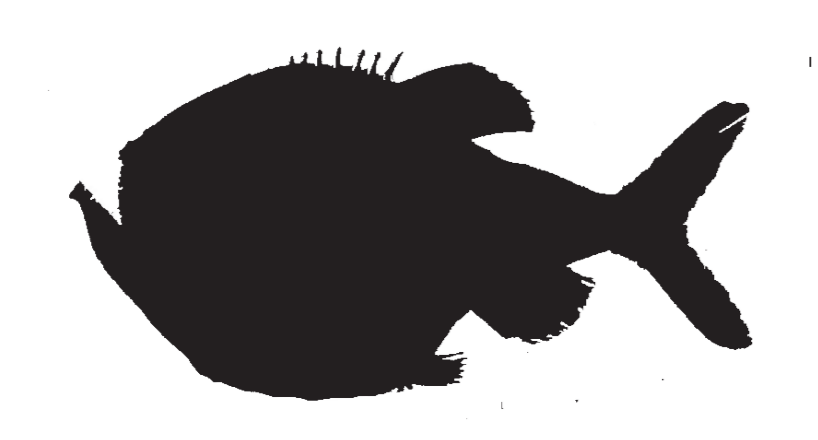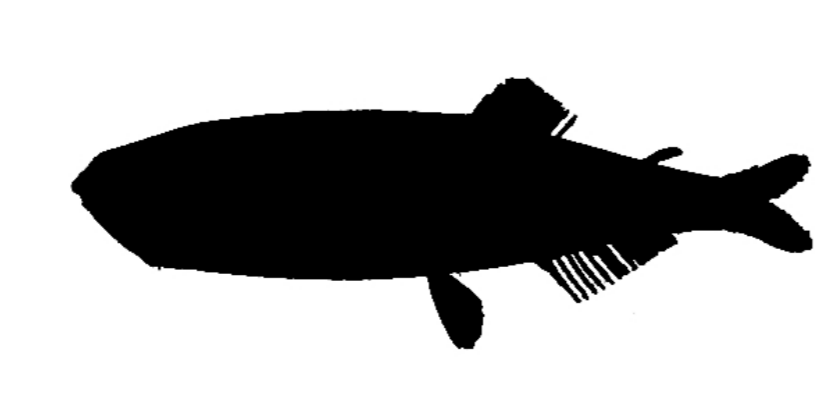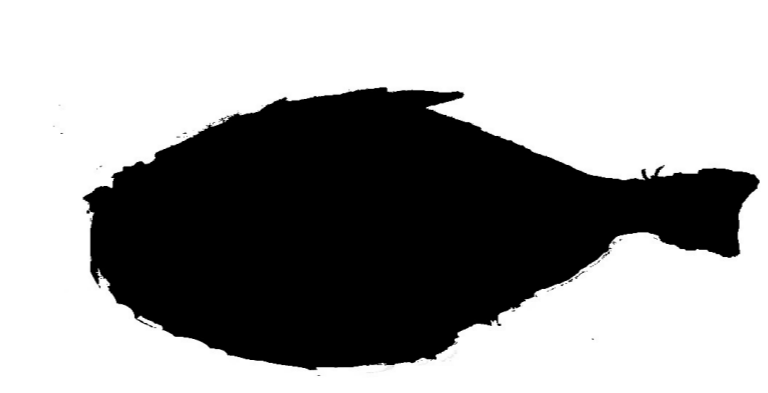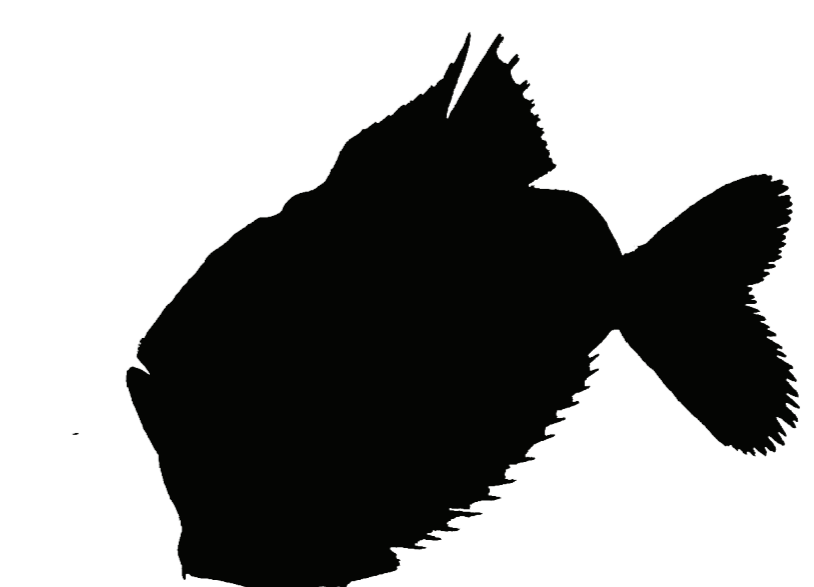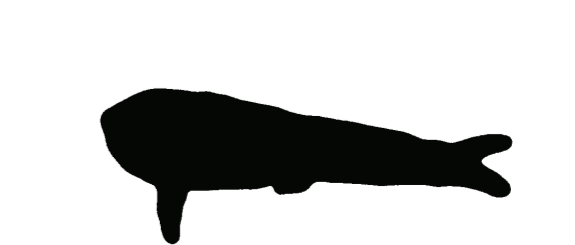



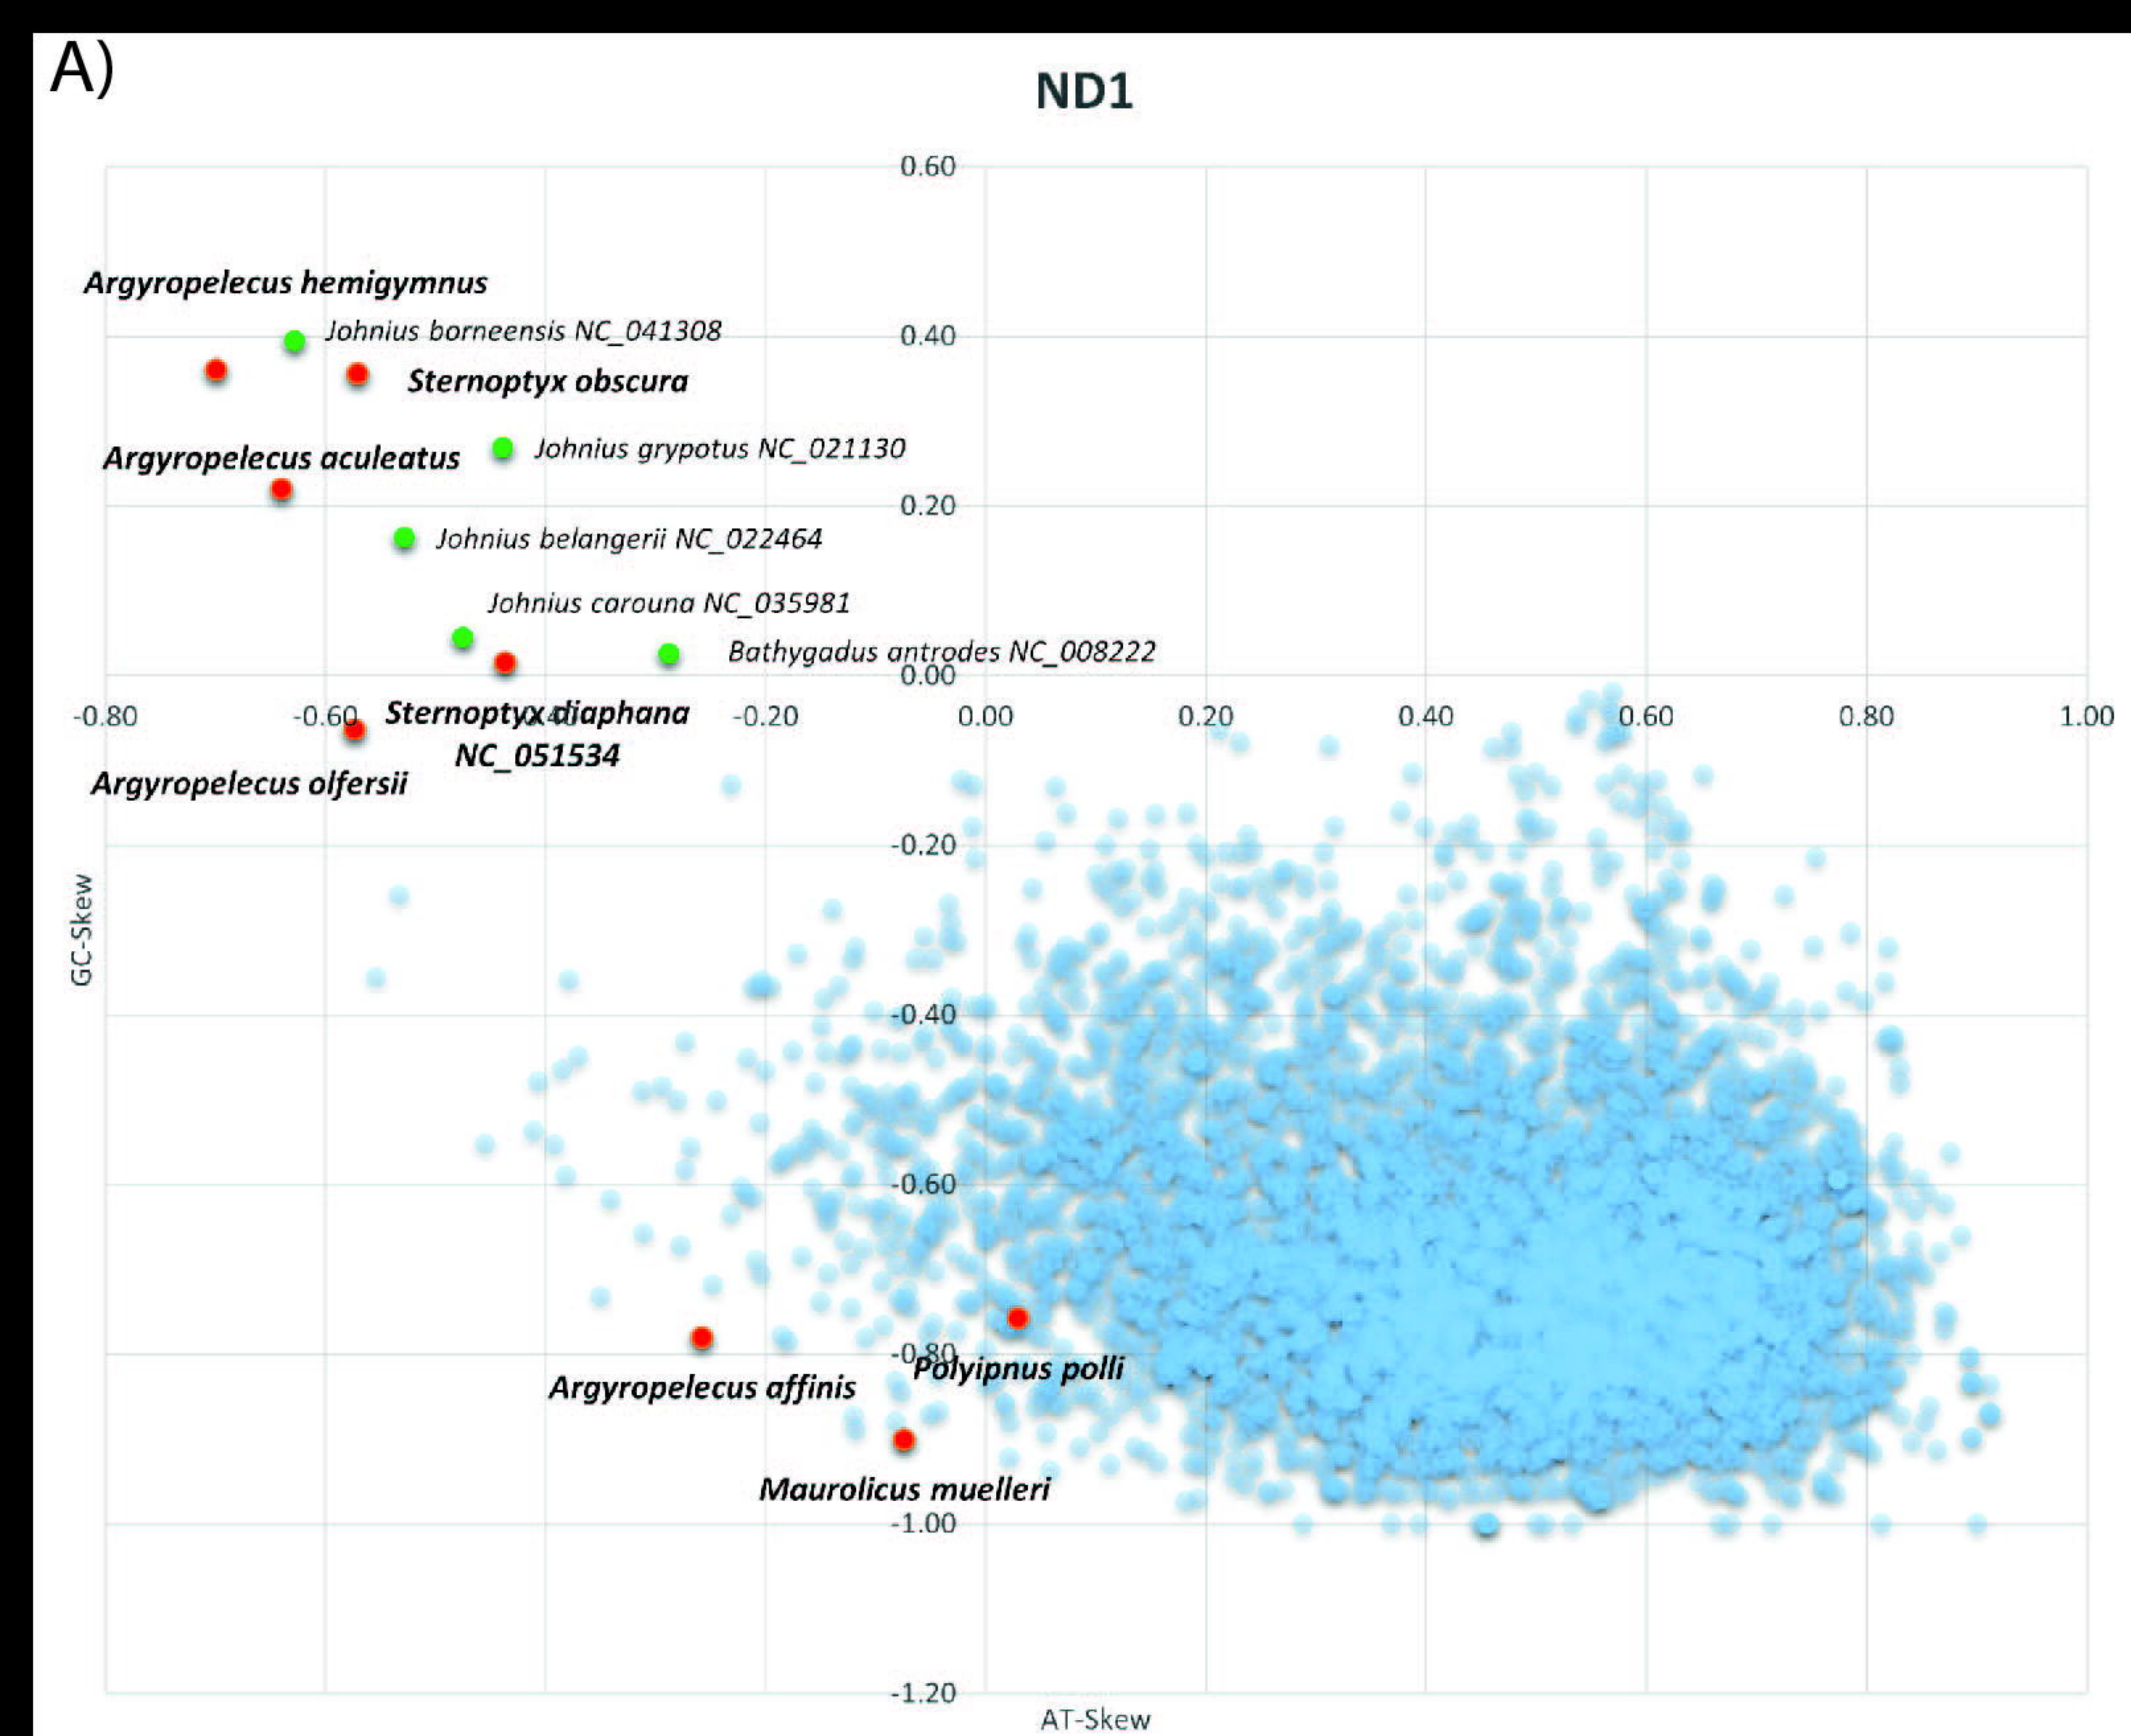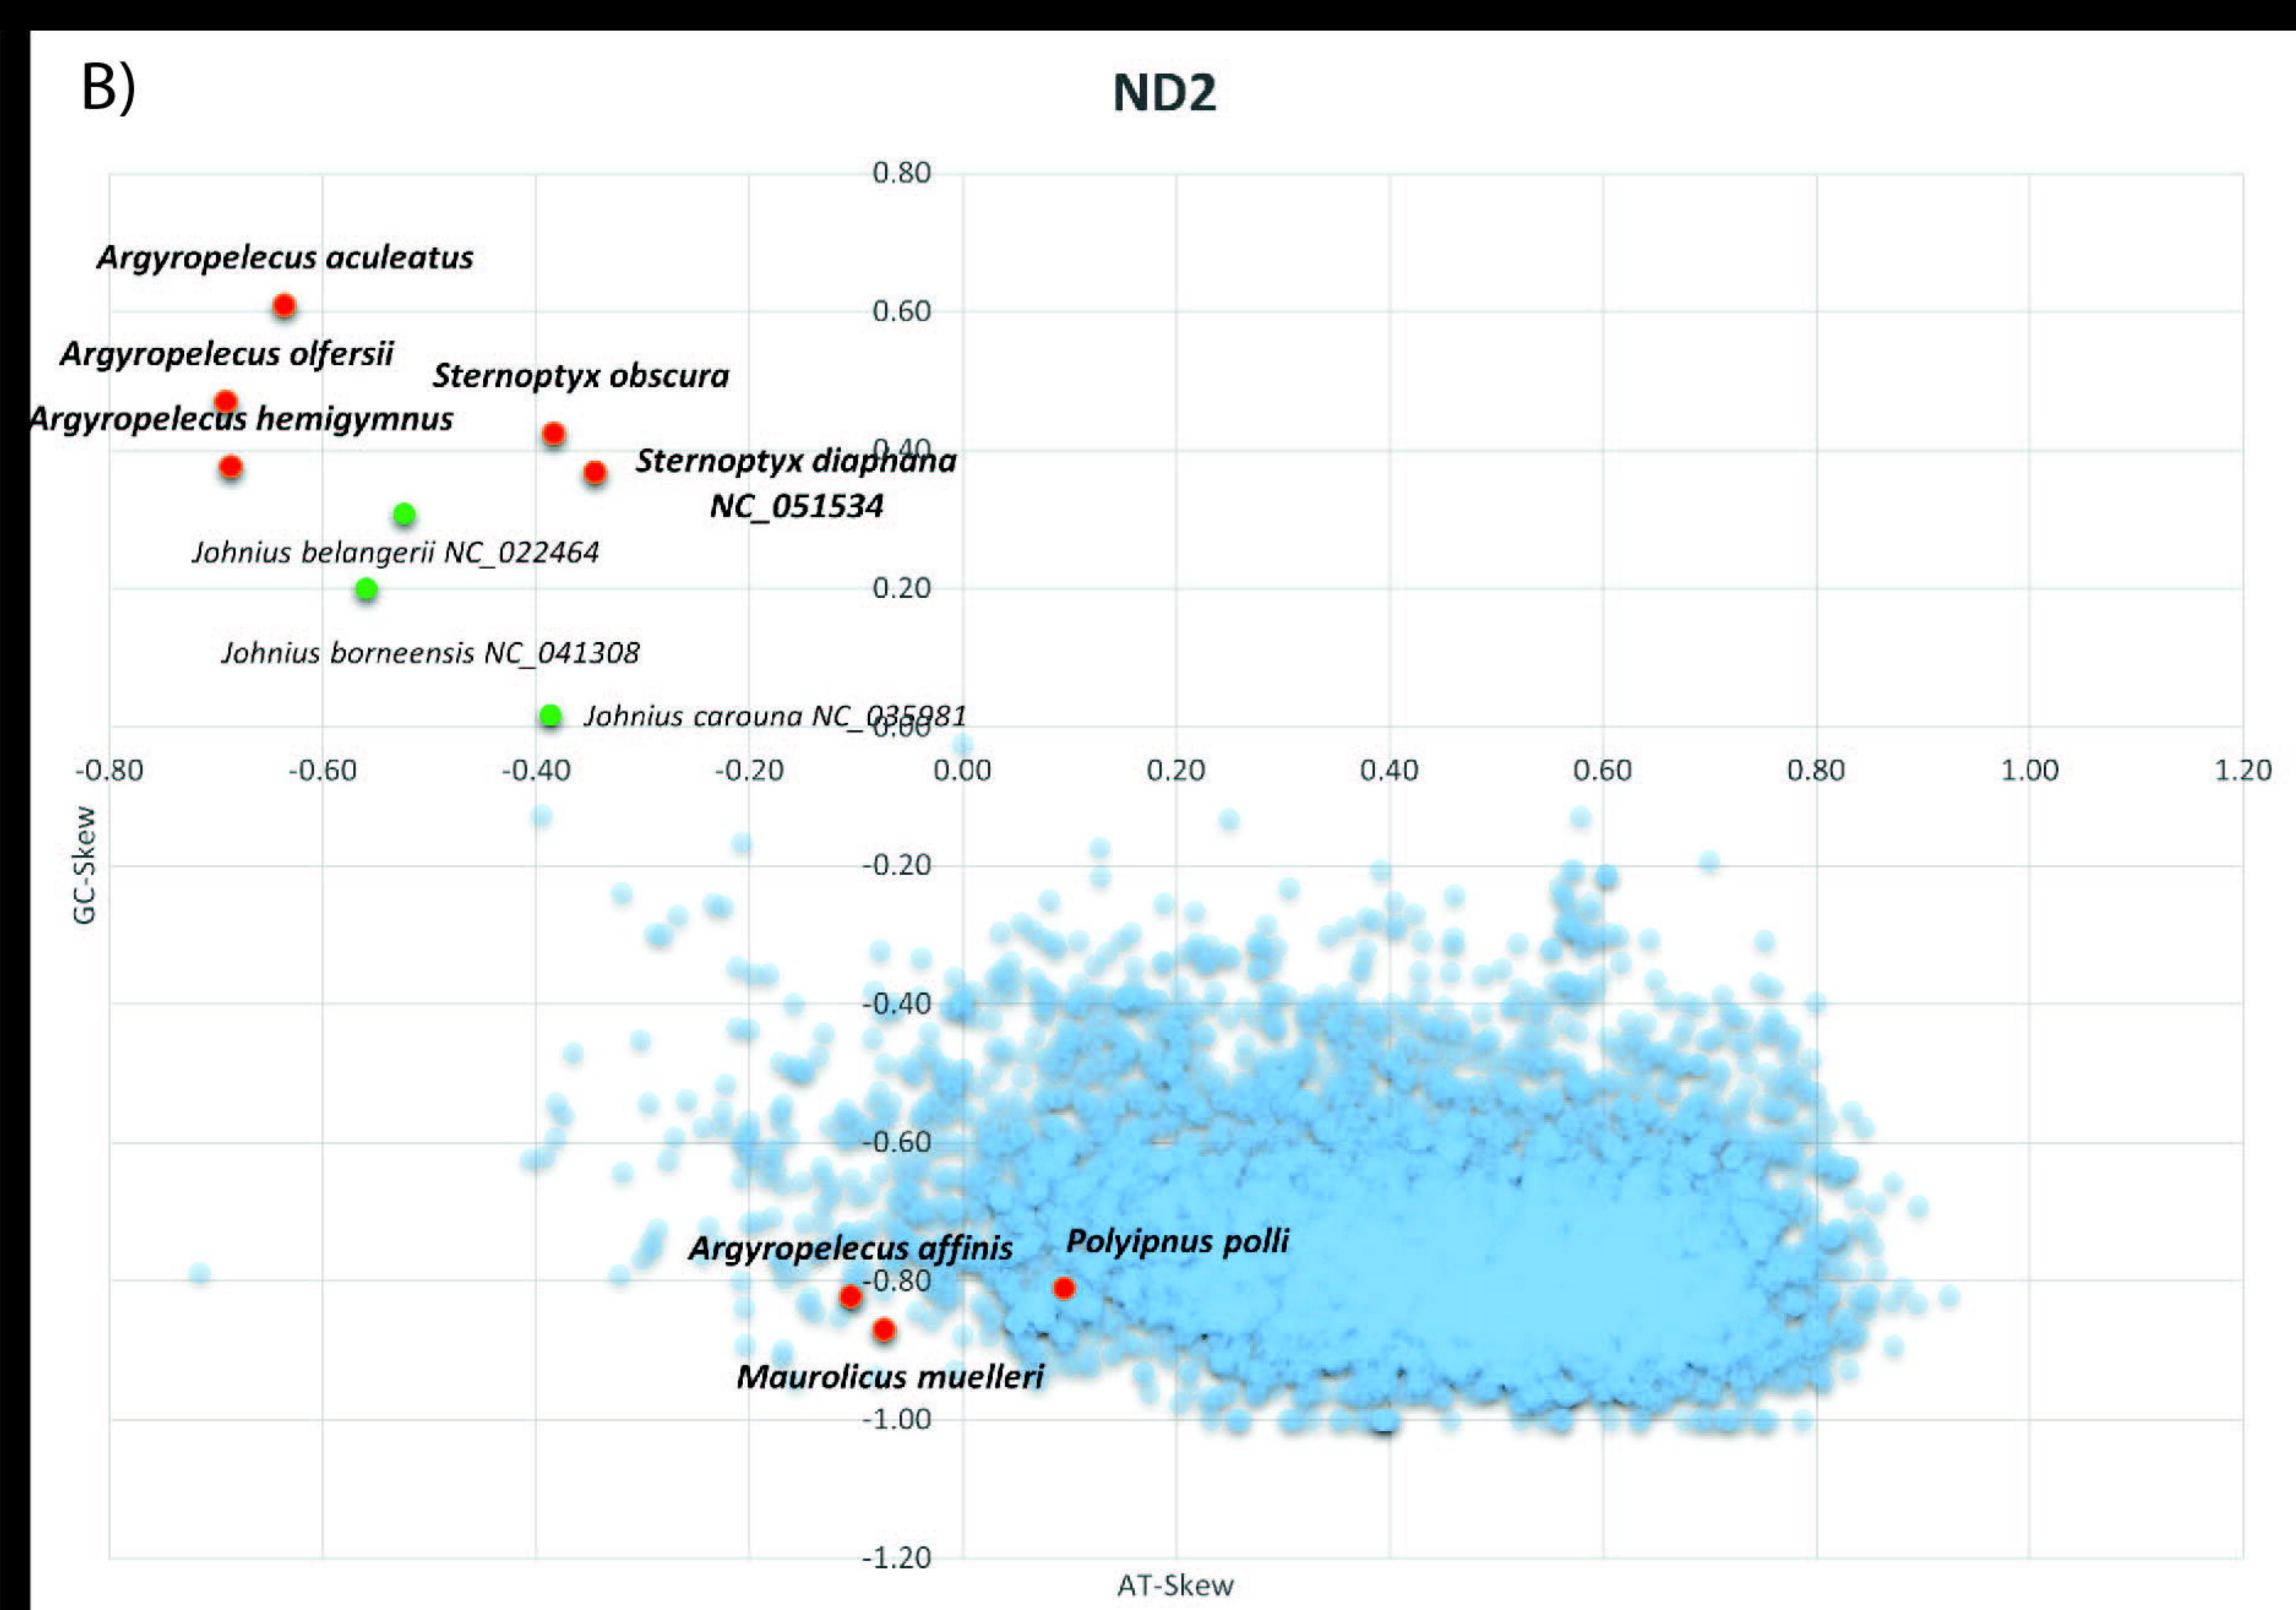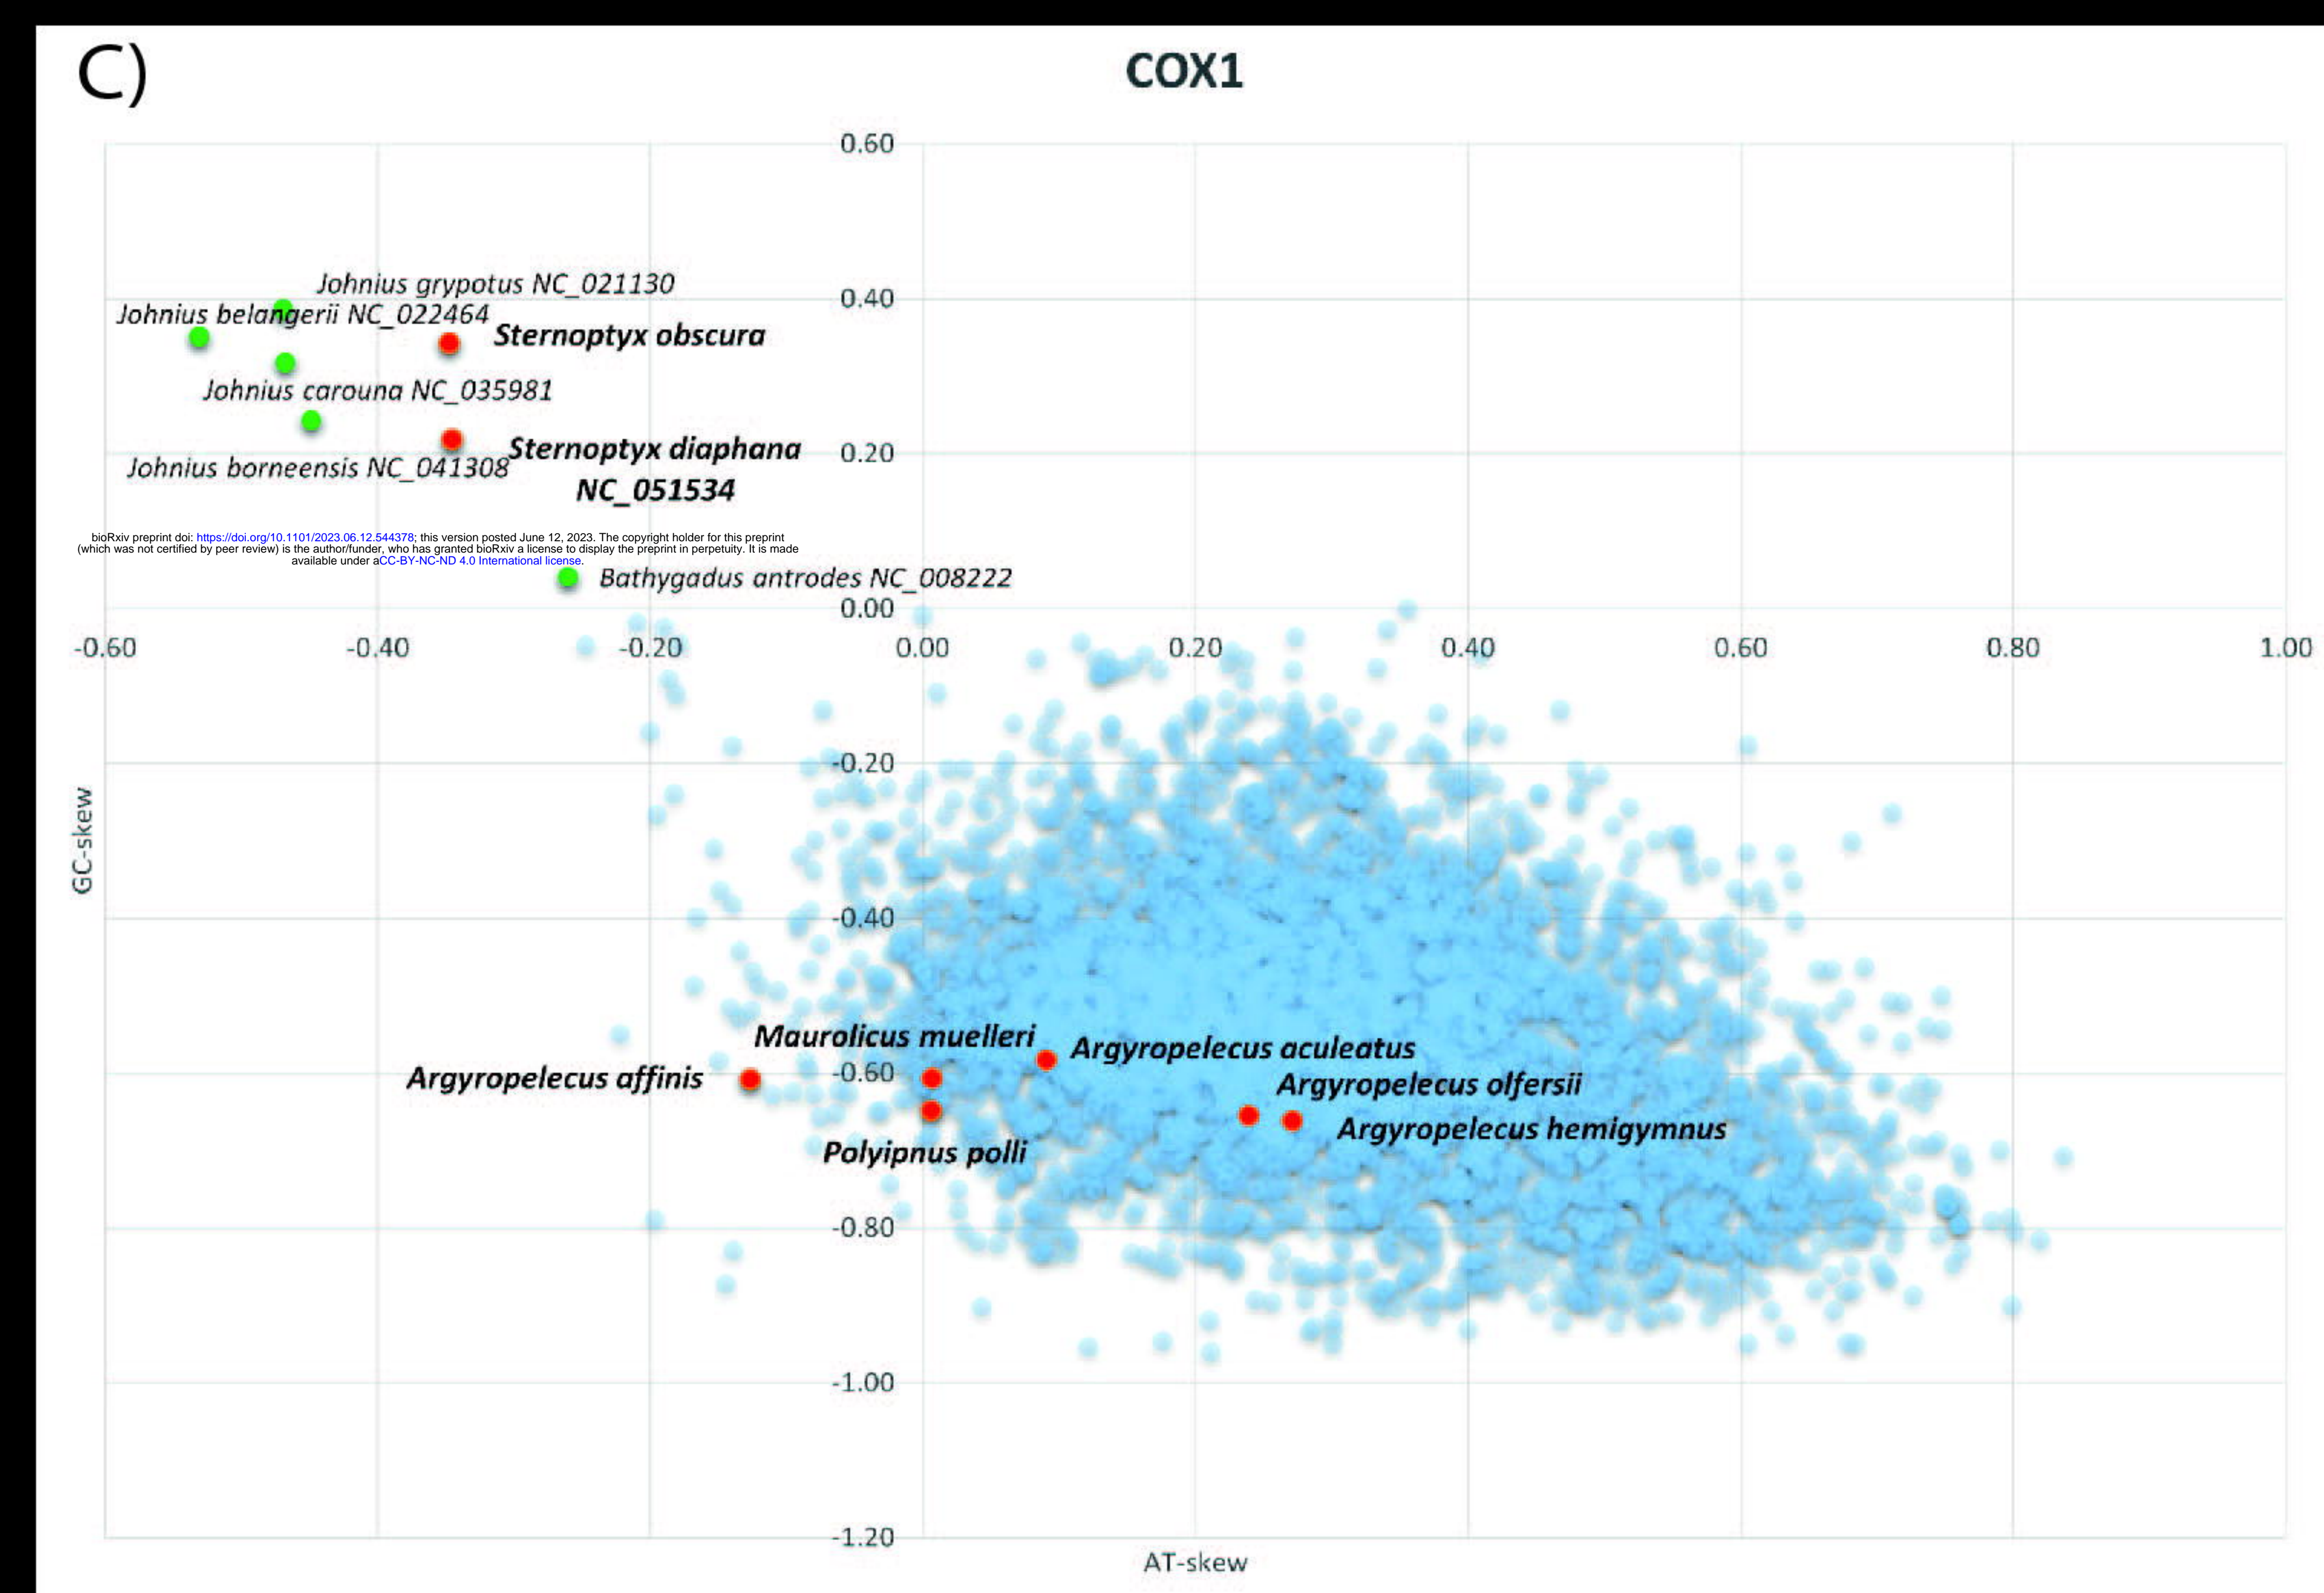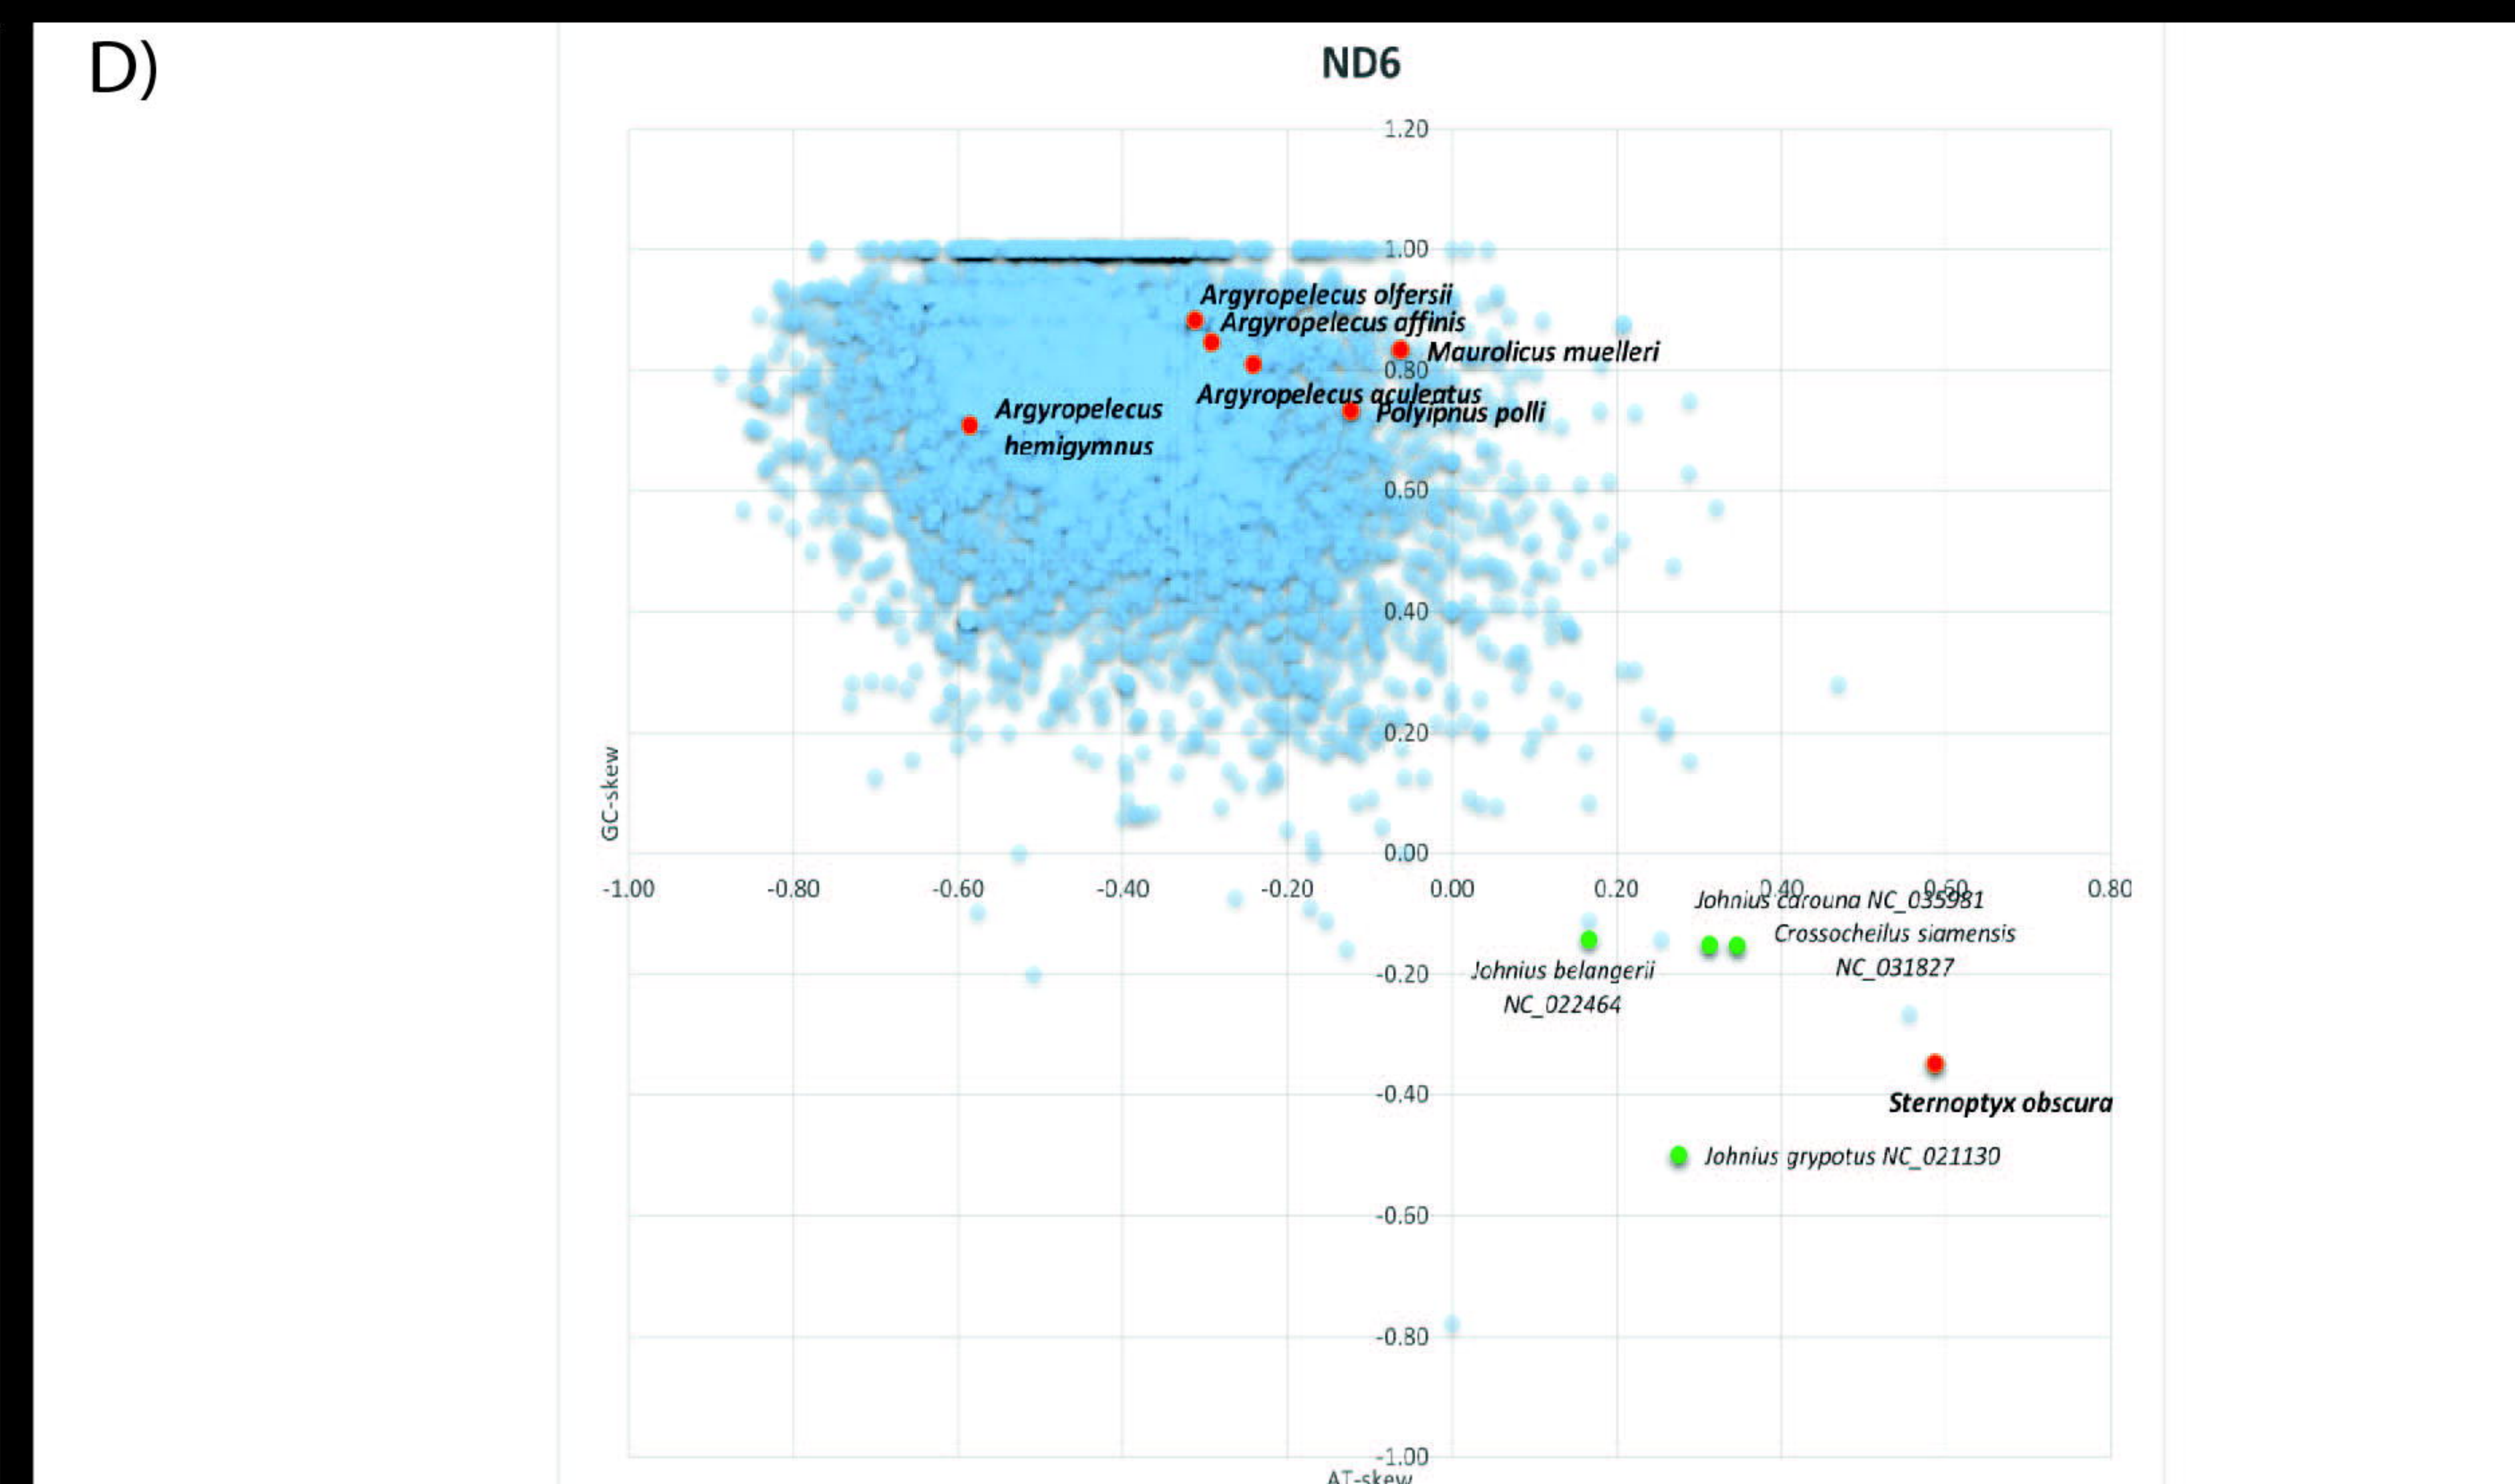

|                  |                                   |                       |              |                         |        |
|------------------|-----------------------------------|-----------------------|--------------|-------------------------|--------|
| Sternoptychidae  | <i>Argyropelecus affinis</i>      | AP012964.1            | -            | -                       | 15,489 |
| Sternoptychidae  | <i>Argyropelecus hemigymnus</i> * | OR062952              | SAMN35453526 | SRR24764802             | 20,747 |
| Sternoptychidae  | <i>Argyropelecus olfersii</i> *   | OR062953 and OR062954 | SAMN35453527 | SRR24764803             | 16,414 |
| Sternoptychidae  | <i>Maurolicus muelleri</i>        | AP012963.1            | -            | -                       | 15,230 |
| Sternoptychidae  | <i>Maurolicus muelleri</i> *      | OR062955              | SAMN35453528 | SAMN35453528            | 16,604 |
| Sternoptychidae  | <i>Polyipnus polli</i>            | AP012962.1            | -            | SRR24764801             | 16,773 |
| Sternoptychidae  | <i>Sternoptyx diaphana</i>        | MT588184.1            | SAMN35453678 | SRR24764797-SRR24764800 | 17,224 |
| Sternoptychidae  | <i>Sternoptyx obscura</i>         | OP057081.1            | -            | -                       | 18,293 |
| Gonostomatidae   | <i>Sigmops gracilis</i>           | AB016274.1            | -            | -                       | 16,436 |
| Stomiidae        | <i>Tactostoma macropus</i>        | LC377784.2            | -            | -                       | 17,563 |
| Stomiidae        | <i>Photonectes margarita</i>      | AP018417.1            | -            | -                       | 18,592 |
| Stomiidae        | <i>Trigonolampa miriceps</i>      | AP012961.1            | -            | -                       | 15,709 |
| Stomiidae        | <i>Astronesthes lucifer</i>       | AP012959.1            | -            | -                       | 15,491 |
| Stomiidae        | <i>Stomias atriventer</i>         | MG321595.1            | -            | -                       | 17,596 |
| Stomiidae        | <i>Chauliodus sloani</i>          | AP002915.1            | -            | -                       | 17,814 |
| Diplophidae      | <i>Diplophos taenia</i>           | AP012960.1            | -            | -                       | 16,427 |
| Diplophidae      | <i>Diplophos sp.</i>              | AB034825.1            | -            | -                       | 16,418 |
| Phosichthyidae   | <i>Vinciguerria nimbaria</i>      | AP006769.1            | -            | -                       | 16,741 |
| Phosichthyidae   | <i>Vinciguerria nimbaria</i>      | AP012958.1            | -            | -                       | 16,741 |
| Myctophum affine | <i>Myctophum affine</i>           | AP002922.1            | -            | -                       | 16,239 |
| Trachipteridae   | <i>Trachipterus trachipterus</i>  | AP002925.1            | -            | -                       | 16,162 |
| Ateleopodidae    | <i>Ateleopus japonicus</i>        | AP002916.1            | -            | -                       | 16,650 |
| Synodontidae     | <i>Saurida undosquamis</i>        | AP002920.1            | -            | -                       | 15,737 |
| Salmonidae       | <i>Coregonus lavaretus</i>        | AB034824.1            | -            | -                       | 16,737 |
